1 **The plant mobile domain proteins MAIN and MAIL1 interact with the**  
2 **phosphatase PP7L to regulate gene expression and silence transposable**  
3 **elements in *Arabidopsis thaliana*.**

4

5 Short title: The PMD MAIN/MAIL1 and PP7L complex regulates gene expression and TE silencing.

6

7 Melody Nicolau<sup>1,2</sup>, Nathalie Picault<sup>1,2</sup>, Julie Descombin<sup>1,2</sup>, Yasaman Jami-Alahmadi<sup>3</sup>, Suhua Feng<sup>4</sup>,

8 Etienne Bucher<sup>5</sup>, Steven E. Jacobsen<sup>4,6</sup>, Jean-Marc Deragon<sup>1,2</sup>, James Wohlschlegel<sup>3</sup> and Guillaume

9 Moissiard<sup>1,2\*</sup>.

10

11 1 LGDP-UMR5096, CNRS, Perpignan, France.

12 2 LGDP-UMR5096, Université de Perpignan Via Domitia, France.

13 3 Department of Biological Chemistry, University of California at Los Angeles, Los Angeles, CA, USA.

14 4 Department of Molecular, Cell and Developmental Biology, University of California at Los Angeles,  
15 Los Angeles, CA, USA.

16 5 Plant Breeding and Genetic Resources, Agroscope, Nyon, Switzerland.

17 6 Howard Hughes Medical Institute, University of California at Los Angeles, Los Angeles, CA, USA.

18

19 \* Corresponding author

20 E-mail: [guillaume.moissiard@univ-perp.fr](mailto:guillaume.moissiard@univ-perp.fr)

21

## 22 **ABSTRACT**

23 Transposable elements (TEs) are DNA repeats that must remain silenced to ensure cell  
24 integrity. Several epigenetic pathways including DNA methylation and histone modifications are  
25 involved in the silencing of TEs, and in the regulation of gene expression. In *Arabidopsis thaliana*, the  
26 TE-derived plant mobile domain (PMD) proteins have been involved in TE silencing, genome stability,  
27 and control of developmental processes. Using a forward genetic screen, we found that the PMD  
28 protein MAINTENANCE OF MERISTEMS (MAIN) acts synergistically and redundantly with DNA  
29 methylation to silence TEs. We found that MAIN and its close homolog MAIN-LIKE 1 (MAIL1) interact  
30 together, as well as with the phosphoprotein phosphatase (PPP) PP7-like (PP7L). Remarkably, *main*,  
31 *mail1*, *pp7l* single and *mail1 pp7l* double mutants display similar developmental phenotypes, and  
32 share common subsets of upregulated TEs and misregulated genes. Finally, phylogenetic analyses of  
33 PMD and PP7-type PPP domains among the Eudicot lineage suggest neo-association processes  
34 between the two protein domains to potentially generate new protein function. We propose that,  
35 through this interaction, the PMD and PPP domains may constitute a functional protein module  
36 required for the proper expression of a common set of genes, and for silencing of TEs.

37

## 38 **AUTHOR SUMMARY**

39 The plant mobile domain (PMD) is a protein domain of unknown function that is widely spread  
40 in the angiosperm plants. Although most PMDs are associated with repeated DNA sequences called  
41 transposable elements (TEs), plants have domesticated the PMD to produce genic versions that play  
42 important roles within the cell. In *Arabidopsis thaliana*, MAINTENANCE OF MERISTEMS (MAIN) and  
43 MAIN-LIKE 1 (MAIL1) are genic PMDs that are involved in genome stability, developmental processes,  
44 and silencing of TEs. The mechanisms involving MAIN and MAIL1 in these cellular processes remain  
45 elusive. Here, we show that MAIN, MAIL1 and the phosphoprotein phosphatase (PPP) named PP7-like  
46 (PP7L) interact to form a protein complex that is required for the proper expression of genes, and the

47 silencing of TEs. Phylogenetic analyses revealed that PMD and PP7-type PPP domains are evolutionary  
48 connected, and several plant species express proteins carrying both PMD and PPP domains. We  
49 propose that interaction of PMD and PPP domains would create a functional protein module involved  
50 in mechanisms regulating gene expression and repressing TEs.

51

## 52 INTRODUCTION

53 In eukaryotes, DNA methylation and post-translational modifications of histones are  
54 epigenetic marks involved in chromatin organization, regulation of gene expression and silencing of  
55 DNA repeats such as transposable elements (TEs) [1-3]. Constitutive heterochromatin is highly  
56 condensed and enriched in silenced TEs that are targeted by DNA methylation and histone H3 lysine  
57 9 dimethylation (H3K9me<sub>2</sub>). Euchromatin is more relaxed and composed of genes that are more  
58 permissive to transcription, depending on the recruitment of transcription factors (TFs), cofactors and  
59 RNA polymerases [1, 4]. In plants, DNA methylation occurs in three different cytosine contexts: CG,  
60 CHG and CHH (where H = A, T or C), involving specialized DNA methyltransferases [5]. In *Arabidopsis*  
61 *thaliana*, DOMAINS REARRANGED METHYLTRANSFERASE 2 (DRM2) and DRM1 mediate de novo DNA  
62 methylation in all sequence contexts through the RNA-directed DNA methylation (RdDM) pathway,  
63 which involves among other components, RNA-DEPENDENT RNA POLYMERASE 2 (RDR2) and DICER-  
64 LIKE 3 (DCL3) for the production of short interfering (si)RNAs [6, 7]. The maintenance of CG  
65 methylation is specifically performed by METHYLTRANSFERASE 1 (MET1), while CHROMOMETHYLASE  
66 2 (CMT2) and CMT3 are involved in the maintenance at CHG sites [8, 9]. CMT2 can also be involved in  
67 the deposition of CHH methylation at specific genomic location [10, 11]. Finally, DRM2 is mostly  
68 required for the maintenance of CHH methylation through the RdDM pathway [6, 7, 9]. Together with  
69 DNA methylation, additional pathways play important roles in TE silencing. The MICRORCHIDIA 1  
70 (MORC1) and MORC6 ATPases interact together, and are required for heterochromatin condensation  
71 and repression of TEs, acting mostly downstream of DNA methylation and RdDM pathway [12-14].

72 More recently, the *A. thaliana* plant mobile domain (PMD) proteins MAINTENANCE OF

73 MERISTEM (MAIN) and MAIN-LIKE 1 (MAIL1) were identified as new factors required for TE silencing  
74 [15]. In addition, these two proteins have been involved in genome stability, and regulation of  
75 developmental processes such as cell division and differentiation [16, 17]. The PMD is a large protein  
76 domain of unknown function that is widely represented among the angiosperms, predominantly  
77 associated with TEs [15, 18]. It has been proposed that genic PMD versions, such as the MAIN and  
78 MAIL1 proteins derived from TEs after gene domestication [15, 18, 19]. Previous studies suggested  
79 that genic PMDs could act as cellular factors related to transcription, possibly acting as transcription  
80 factor (TF)-like, co-factor or repressor proteins regulating this cellular process [16, 18]. Nevertheless,  
81 the role of PMD proteins in the regulation of transcription remains elusive. Most of genic PMD  
82 proteins are standalone versions, however, in some cases, the PMD is fused to another protein  
83 domain, such as protease, kinase or metallo-phosphatase (MPP) domains. For instance in *A. thaliana*,  
84 the MAIL3 protein carries a PMD, which is fused to a putative serine/threonine-specific  
85 phosphoprotein phosphatase (PPP) domain phylogenetically related to the plant-specific protein  
86 phosphatase 7 (PP7) [20]. PP7 is a calmodulin-binding PPP that has been related to cryptochrome  
87 (CRY)-mediated blue-light signaling, and to the control of stomatal aperture [20-22]. PP7 is also  
88 involved in the perception of red/far red light by controlling the phytochrome pathway [23, 24]. In  
89 addition to PP7 and MAIL3 (also known as “long PP7”), the protein PP7-like (PP7L) belongs to the same  
90 phylogenetic clade [20]. PP7L was recently identified as a nuclear protein involved in chloroplast  
91 development and abiotic stress tolerance [25]. The *pp7l* mutant plants showed photosynthetic defects  
92 and strong developmental phenotype associated with misregulation of several genes [25].

93 In this study, we described a forward genetic screen based on a GFP reporter gene that  
94 allowed us to identify a mutant population in which *MAIN* is mutated, leading to GFP overexpression.  
95 We then deciphered the genetic interaction between the DRM2, CMT3 and MAIN, showing that these  
96 proteins are part of different epigenetic pathways that act redundantly or synergistically to repress  
97 TEs. Biochemical analyses indicated that MAIN and MAIL1 physically interact together. These analyses  
98 also identified PP7L as a robust interactor of the two PMD proteins. In addition, the characterization

99 of developmental and molecular phenotypes of *pmd* and *pp7l* single and double mutant plants  
100 strongly suggest that these proteins interact together to silence TEs, and regulate the expression of a  
101 common set of genes. Finally, phylogenetic analyses allowed us to determine the distribution of PMD  
102 and PP7/PP7L domains among the Eudicots. Based on these analyses, we have evidences of co-  
103 evolution linked to the neo-association of the PMD and PP7-type PPP domains on single proteins in  
104 several Eudicot species, suggesting a convergent evolution between these two protein domains.

105

## 106 **RESULTS**

### 107 **Mutation in *MAIN* is responsible for TE silencing defects.**

108 The *ATCOPIA28* retrotransposon *AT3TE51900* (hereafter called *ATCOPIA28*) is targeted by  
109 several epigenetic pathways such as DNA methylation and the MORC1/6 complex, which altogether  
110 contribute to its repression. We engineered a construct in which the 5' long terminal repeat (LTR)  
111 promoter region of *ATCOPIA28* controls GFP transcription (Fig 1A). While the *ATCOPIA28::GFP*  
112 transgene is fully silenced in wild type (WT) plants, it is weakly expressed in the DNA methylation-  
113 deficient *drm1 drm2 cmt3 (ddc)* triple mutant background (Fig 1B) [26]. We performed an ethyl  
114 methane sulfonate (EMS) mutagenesis using the *ATCOPIA28::GFP ddc* plants as sensitized genetic  
115 material, and screened for mutant populations showing GFP overexpression. Among, the selected  
116 populations, we retrieved two new mutant alleles of *MORC6* carrying missense mutations in either  
117 the GHKL or S5 domains of the protein (S1A-C Fig). We also identified the population *ddc #16* showing  
118 strong overexpression of GFP and misregulation of several endogenous TEs, including *ATCOPIA28* (Fig  
119 1B-D). Mapping experiments based on whole genome resequencing and bulk segregant analysis  
120 indicated that *ddc #16* carries a missense point mutation (C230Y) in the gene *AT1G17930*, previously  
121 named *MAIN* (S1D and S1E Fig). Genetic complementation analyses by crossing the *ddc #16* EMS  
122 mutant with the knock-out (KO) transferred DNA (T-DNA) insertion line *main-2* generated F1 *ddc #16*  
123 x *main-2* plants that did not express the GFP (S1F Fig). Transcriptional profiling analyses showed,

124 however, that endogenous TEs, including *ATCOPIA28*, were upregulated in F1 *ddc #16* x *main-2* plants,  
125 but not in F1 control plants generated from the backcross of *ddc #16* with WT Columbia (Col) plants  
126 (S1G Fig). Self-fertilization of F1 *ddc #16* x *main-2* plants allowed us to retrieve several F2 *ddc #16* x  
127 *main-2* plants overexpressing the GFP (S1F Fig). Among these GFP positive F2 plants, we identified  
128 individuals that were either homozygote for the EMS mutation in the *MAIN* gene, or plants carrying  
129 both the EMS and T-DNA *main-2* mutant alleles (S1F Fig). Moreover, while all these plants were  
130 homozygote for the *drm2* mutation, half of them segregated the *cmt3* mutation. Thus, altogether,  
131 these analyses suggested that *ATCOPIA28::GFP* silencing is more DRM2- than CMT3-dependent. More  
132 importantly, they confirmed that *MAIN* was the mutated gene causing the upregulation of  
133 *ATCOPIA28::GFP* and several endogenous TEs. Therefore, *ddc #16* was renamed *ddc main-3*.

134

135 **MAIN, DRM2 and CMT3 act redundantly or synergistically to repress TEs and DNA-methylated**  
136 **genes.**

137 To determine the genetic interaction of *ddc* and *main-3* mutations on TE silencing, we carried  
138 out two independent RNA sequencing (RNA-seq) analyses in the hypomorphic *main-3* single, *ddc* triple  
139 and *ddc main-3* quadruple mutant plants (Fig 2A). We observed some variations among the  
140 misregulated loci between the two RNA-seq analyses (S2A-B Fig and S1 Table). Therefore, we decided  
141 to focus our analyses on loci that were reproducibly misregulated in each mutant background (S2C Fig  
142 and S2 Table). As previously described, the *ddc* mutant showed upregulation of several TEs spread  
143 over the five chromosomes (Fig 2B-D and S2D Fig, and S2 Table) [11]. Loss of TE silencing was also  
144 observed to a milder degree in the *main-3* mutant, with the significant enrichment of pericentromeric  
145 TEs among the upregulates TEs (Fig 2B-D and S2D Fig, and S2 Table). The *ddc main-3* mutant showed  
146 an exacerbation of TE silencing defects, with a large number of pericentromeric TEs being specifically  
147 upregulated in this mutant background (Fig 2B-D and S2 Table). Comparative analyses revealed that  
148 upregulated TEs cluster into four distinct classes (Fig 2E and S2E Fig). Class I TEs are upregulated in  
149 both *ddc* and *main-3* mutants, and combining these mutations in *ddc main-3* lead to synergistic effects

150 (Fig 2E and S2E-F Fig). Class II and class III TEs are targeted by the MAIN and DRM2/CMT3 pathways,  
151 respectively (Fig 2E and S2E-F Fig). However, the upregulation of class II and class III TEs is further  
152 enhanced in *ddc main-3*, which suggests that the MAIN and DRM2/CMT3 pathways can partially  
153 compensate each other at these genomic locations (S2F Fig). Finally, the most abundant class IV TEs  
154 are only misregulated in *ddc main-3*, which implies that the MAIN and DRM2/CMT3 pathways act  
155 redundantly to silence these TEs (Fig 2E and S2E-F Fig).

156         Several genes were reproducibly misregulated in the three mutant backgrounds (S2 Table).  
157 Among these genes, a subset was commonly upregulated in *ddc*, *main-3* and *ddc main-3* (S2G Fig).  
158 Remarkably, genes that were upregulated in the three mutants were significantly enriched in  
159 pericentromeric regions of chromosomes, where constitutive heterochromatin resides (S2G Fig). This  
160 is consistent with the fact that, among the upregulated genes, we identified a large proportion of DNA-  
161 methylated genes (S2G Fig). Conversely, we could not identify a subset of genes commonly  
162 downregulated in *ddc*, *main-3* and *ddc main-3* (S2G Fig). Furthermore, downregulated genes were not  
163 enriched in pericentromeric regions, and most of them were not targeted by DNA methylation (S2G  
164 Fig).

165         To further dissect the genetic interaction between the DRM2, CMT3 and MAIN pathways, we  
166 generated the *drm1 drm2 main-3* (*dd main-3*) and *cmt3 main-3* mutants (S2H Fig). We then analyzed  
167 the expression level of several TEs previously identified as misregulated in *ddc*, *main-3* and/or *ddc*  
168 *main-3*. The endogenous *ATCOPIA28* was the most expressed in *ddc main-3* and *dd main-3*, and to a  
169 lesser extent, in *cmt3 main-3* (Fig 2F). This is consistent with the fact that all the F2 *ddc #16* x *main-2*  
170 plants overexpressing *ATCOPIA28::GFP* were *drm2* homozygote, although they segregated the *cmt3*  
171 mutation (S1F Fig). Further analyses showed that most of the tested TEs tend to be more expressed  
172 in *cmt3 main-3* than in *dd main-3*, with the exception of *ATIS112A* that was more upregulated in *dd*  
173 *main-3* than in *cmt3 main-3* (Fig 2G). In conclusion, these analyses showed complex genetic  
174 interactions between the DRM2, CMT3 and MAIN pathways. Depending on the locus, the three  
175 pathways act redundantly or synergistically to repress TEs and DNA-methylated genes.

176

177 **MAIN and MAIL1 are required for the proper expression of a common set of genes and TEs.**

178 To study the role of MAIN and MAIL1 in the regulation of gene expression and TE silencing,  
179 we performed two independent RNA-seq experiments in the *main-2* and *mail1-1* null mutants (Exp1  
180 and Exp3, S3 Table), and reanalyzed previously published RNA-seq datasets (Exp2, S3 Table) [15].  
181 Although all the RNA-seq experiments were performed using plants at the same developmental stage  
182 (3-week-old seedlings), we observed important variations among the number of genes and TEs that  
183 were misregulated in the two *pmd* null mutants in each RNA-seq experiment (S3A Fig and S3 Table).  
184 Variations among WT replicates from the three independent RNA-seq experiments were not as  
185 pronounced, and principal component analysis (PCA) showed that all the WT samples tend to cluster  
186 together (S3B Fig). Conversely, the *pmd* mutant samples did not cluster together based on their  
187 genetic background, but rather based on the RNA-seq experiment (S3B Fig). This suggests that *main-2*  
188 and *mail1-1* perceive their environment in a similar way, leading to the misregulation of similar sets  
189 of loci in each independent RNA-seq experiment. Furthermore, this is consistent with the hypothesis  
190 that MAIN and MAIL1 act in the same pathway [15]. Comparative analyses between the three  
191 independent RNA-seq experiments allowed us to identify genes and TEs that were reproducibly  
192 misregulated in *main-2* and *mail1-1* (S3C Fig). For stringency purpose, we decided to focus on these  
193 lists of reproducibly misregulated loci to perform further analyses (Fig 3A-B and S4 Table).

194 We then compared the transcriptomes of *main-2* and *mail1-1* null mutants, together with the  
195 hypomorphic *main-3* mutant allele (S2 and S4 Tables). We identified sets of genes and TEs that were  
196 specifically misregulated in each mutant background (Fig 3C and D). These analyses also revealed  
197 some loci that were commonly misregulated in the three mutants (Fig 3C-D, S3D-F Fig and S5 Table).  
198 The biggest overlaps were among the downregulated genes, as most of the downregulated genes in  
199 *main-2* were also downregulated in *mail1-1* and, to a smaller proportion, in *main-3* (Fig 3D). As  
200 observed in *main-3* (S2G Fig), the genes that were downregulated in *main-2* and *mail1-1* were mostly  
201 located in the chromosome arms, and they were not DNA-methylated genes (Fig 3E). However, unlike



202 in *main-3*, the upregulated genes in *main-2* and *mail1-1* were not enriched in pericentromeric regions,  
203 and only one quarter of them were DNA-methylated genes (Fig 3E). This discrepancy suggests that  
204 MAIN and MAIL1 are not only required for the silencing of pericentromeric and DNA-methylated loci,  
205 but also for the repression of genes that are not targeted by DNA methylation. In conclusion, these  
206 comparative analyses allowed us to precisely define the sets of genes and TEs that are commonly  
207 misregulated in *main-2*, *mail1-1* and *main-3* mutants. Moreover, these results revealed important  
208 overlaps between the misregulated loci in *main-2* and *mail1-1*, which strongly suggests that the two  
209 proteins act in the same pathway to regulate the expression of common sets of loci.

210

211 **Slight increase in non-CG methylation in the *main-2* mutant does not correlate with changes in gene**  
212 **expression and TE silencing defect.**

213 Whole genome bisulfite sequencing (BS-seq) analyses showed that, at the chromosome scale,  
214 DNA methylation level is mostly unchanged in *main-2* in comparison to WT, with the exception of a  
215 slight increase in CHG methylation in pericentromeric regions (Fig 4A). Subtle but statistically  
216 significant CHG hypermethylation was further confirmed in pericentromeric TEs and genes, which are  
217 mostly TE genes (Fig 4B and C). Slight CHG and CHH hypermethylation was also detected in TEs located  
218 in chromosome arms (Fig 4D). Conversely, genes located in chromosome arms did not show  
219 significant changes in DNA methylation level in *main-2* (Fig 4E). Identical results were obtained by  
220 analyzing the DNA methylation level at TEs and genes that were specifically misregulated in *main-2*  
221 (Fig 4F-H). We then analyzed the DNA methylation level at genomic locations previously defined as  
222 differentially hypomethylated regions (hypo DMRs) at CHG and CHH sites in *cmt3* and *drm1drm2* (*dd*)  
223 mutants, respectively [26]. The *cmt3* and *dd* hypo DMRs are mostly located in TEs. As observed with  
224 pericentromeric genes and all TEs (Fig 4B-D), we found slight increases in CHG and CHH methylation  
225 at *cmt3* and *dd* hypo DMRs, respectively, in *main-2* (S4A and S4B Fig). Finally, DMR calling in *main-2*  
226 using stringent parameters only identified a few DMRs (S4C Fig). Thus, DNA methylation is mostly  
227 unaffected in *main-2*, with the exception of a slight increase in non-CG methylation at pericentromeric

228 genes and all TEs. Moreover, this subtle non-CG hypermethylation does not correlated with changes  
229 in gene and TE expression observed in *main-2*.

230

231 **MAIN, MAIL1 and the metallo-phosphatase PP7L physically interact together.**

232 The *main-2* and *mail1-1* null mutants display similar molecular and developmental  
233 phenotypes (Fig 3 and Fig 5A). Thus, we hypothesized that the two PMD proteins may act in the same  
234 pathway, possibly by interacting together. To test this hypothesis, we generated transgenic lines  
235 expressing FLAG- and MYC-tagged genomic PMD versions driven by their endogenous promoters. We  
236 confirmed that epitope-tagged MAIN and MAIL1 proteins were produced at the expected sizes, and  
237 they could complement the respective developmental phenotypes of null mutant plants (Fig 5A and  
238 B). Importantly, they could also efficiently rescue the TE silencing and gene expression defects  
239 observed in the two *pmd* mutants, implying that epitope-tagged MAIN and MAIL1 are functional  
240 proteins (Fig 5C-E). Using FLAG-tagged MAIN and MAIL1 expressing plants, immunoprecipitation  
241 followed by mass spectrometry (IP-MS) analyses were carried out to determine potential protein  
242 interactors. Mass spectrometry (MS) analyses indicated that MAIL1 was strongly immunoprecipitated  
243 with MAIN-FLAG and *vice versa* (Fig 5F). To validate IP-MS results, we crossed the MAIN-FLAG and  
244 MAIL1-MYC lines together. We then performed co-immunoprecipitation (co-IP) experiments using F1  
245 hybrid plants co-expressing the two transgenes, and confirmed that MAIN and MAIL1 interact  
246 together (Fig 5G). MS analyses of MAIN-FLAG and MAIL1-FLAG IP also identified the metallo-  
247 phosphatase PP7L as putative interactor (Fig 5F). MAIN, MAIL1 and PP7L were the only three proteins  
248 reproducibly enriched across multiple replicates (Fig 5F). Co-IP experiments using plants co-expressing  
249 either PP7L-FLAG together with MAIN-MYC or MAIL1-MYC constructs confirmed the interaction  
250 between PP7L and each PMD protein (Fig 5H and I). Thus, the three proteins MAIN, MAIL1 and PP7L  
251 physically interact together.

252

253 **The *main*, *mail1* and *pp7l* mutants display similar developmental and molecular phenotypes.**

254 PP7L is a putative metallo-phosphatase that was recently identified as a nuclear protein  
255 required for photosynthesis [20, 25]. The *pp7l-2* null mutant displays abnormal developmental  
256 phenotype reminiscent of the two *pmd* null mutant plants, and 3-week-old *mail1-1 pp7l-2* double  
257 mutant plants do not show exacerbation of this phenotype (Fig 6A). To determine the genetic  
258 interaction between PMD and PP7L, we compared the transcriptomes of *main-2*, *mail1-1*, *pp7l-2*  
259 single and *mail1-1 pp7l-2* double mutants (RNA-seq Exp3, S3 and S6 Tables). As previously described  
260 for *main-2* and *mail1-1* (S3B Fig), PCA analyses showed that all the mutant samples tend to cluster  
261 together, and away from WT controls (S5A Fig). We identified a large number of misregulated loci in  
262 each mutant background (S5B Fig). Comparative analyses revealed that significant proportions of  
263 these loci were commonly misregulated in all the mutant backgrounds, which is consistent with the  
264 fact that MAIN, MAIL1 and PP7L interact together to possibly regulate gene expression (Fig 6B and C).  
265 These analyses also identified loci that were specifically misregulated in *main-2*, *mail1-1* or *pp7l-2*,  
266 which suggests that each protein is independently required for the proper expression of subsets of  
267 loci (Fig 6C). Besides, these analyses revealed loci that were exclusively misregulated in the *mail1-1*  
268 *pp7l-2* double mutant, which implies that PP7L and MAIL1 may act redundantly to ensure the proper  
269 expression of these loci (Fig 6B-C). Further analyses showed that, among the loci that were  
270 misregulated in *mail1-1 pp7l-2*, upregulated genes were significantly more expressed in the double  
271 mutant than in each single mutant, and upregulated TEs were significantly differentially expressed  
272 only between *mail1-1 pp7l-2* and *pp7l-2* mutants (Fig 6D-E). Conversely, there was no significant  
273 difference of expression between the double mutant and single mutants for the downregulated genes  
274 (Fig 6F). Thus, these analyses suggest that combining the *pp7l-2* and *mail1-1* mutations may lead to  
275 synergistic defects mostly at genes that are upregulated in the double mutant. Considering the  
276 variations observed among the misregulated loci in *main-2* and *mail1-1* between independent RNA-  
277 seq experiments, we then decided to focus our analyses on loci previously defined as reproducibly  
278 misregulated in the two *pmd* mutants (Fig 3, S3 Fig and S4 Table). Among these loci, we identified  
279 several genes and TEs that were also misregulated in *pp7l-2* and *mail1-1 pp7l-2*, with the most

280 significant overlap among downregulated genes (Fig 6G-J and S7 Table). These commonly  
281 misregulated loci did not show any significant difference of expression between the double and single  
282 mutants (Fig6K-M). This suggests that MAIN, MAIL1 and PP7L are equally required for the proper  
283 expression of these subsets of loci (S7 Table). Finally, we performed in silico analyses to identify  
284 enriched DNA motif within a 1kb promoter region upstream of start codon of genes that were up- or  
285 downregulated in the different mutant backgrounds. We could not detect any enrichment of a DNA  
286 motif among any lists of upregulated genes. Likewise, we could not identify a DNA motif significantly  
287 enriched in the lists of downregulated genes from the RNA-seq Exp3. However, we identified a  
288 discrete DNA motif (hereafter called 'DOWN' motif) that was enriched in the promoters of genes that  
289 were reproducibly downregulated in *main-3*, *ddc main-3*, *main-2* and *mail1-1* mutants (S5C Fig). The  
290 'DOWN' motif was further enriched and refined in the promoters of genes commonly downregulated  
291 in all the mutant backgrounds analyzed in this study: eighteen genes out of nineteen, 95% of  
292 enrichment (S5C Fig, S8 and S9 Tables). We analyzed the DNA methylation level of the 'DOWN' motif  
293 in the promoters of these eighteen genes in WT and *main-2*, and found that this DNA motif was not  
294 targeted by DNA methylation. Besides, further analyses showed that only a small fraction of all  
295 *Arabidopsis* genes carried the 'DOWN' motif in their promoter (11%, S5C Fig), which is in the range of  
296 genomic distribution of several DNA motifs recognized by bZIP TFs (S10 Table). Finally, random test  
297 analyses based on nineteen randomly picked genes strongly suggested that the enrichment of the  
298 'DOWN' motif in the promoter of downregulated genes was substantial (S9 Table). Thus, altogether,  
299 these analyses showed that MAIN, MAIL1 and PP7L are equally required for the proper expression of  
300 a common set of genes that are downregulated in each single mutant as well as in *mail1-1 pp7l-2*  
301 double mutant, and these genes carry the 'DOWN' DNA motif in their promoter.

302

### 303 **PP7L is not required for heterochromatin condensation.**

304 WT *Arabidopsis* nuclei at interphase exhibit condensed DNA foci called chromocenters that  
305 are composed of constitutive heterochromatin, and are enriched in H3K9me2 [27]. In several

306 epigenetic mutants, decondensation of constitutive heterochromatin correlates with disruption of  
307 chromocenters, and loss or diffusion of H3K9me2 in the nucleoplasm [27]. Thus, analyzing H3K9me2  
308 subnuclear distribution by immunofluorescence (IF) experiments has been reproducibly used as a  
309 cytological approach to assay for heterochromatin decondensation [12, 27, 28]. A previous study  
310 showed that subnuclear distributions of chromocenters and H3K9me2 were unchanged in *main-2* and  
311 *mail1-1* mutants [15]. However, fluorescent in situ hybridization (FISH) experiments using a DNA  
312 probe for the 106B pericentromeric repeats suggested that heterochromatin was decondensed in the  
313 two *pmd* mutants in comparison to WT plants [15]. We performed IF experiments to analyze the  
314 subnuclear distribution of H3K9me2 in the *pp7l-2* mutant. These analyses did not show any change in  
315 the condensation level of chromocenters in *pp7l-2* nuclei in comparison to WT (Fig 7). Instead, we  
316 observed that *pp7l-2* nuclei were proportionally more condensed than WT nuclei (Fig 7). This is likely  
317 due to the fact that *pp7l-2* mutant displays abnormal phenotype and growth delay in comparison to  
318 WT plants that are entering the floral transition stage, a developmental stage where partial  
319 chromocenter decondensation has been documented [29]. In conclusion, based on the H3K9me2 IF  
320 experiments, we can conclude that *pp7l-2* is not impaired in chromocenter condensation.

321

### 322 **The PMD and PP7 domains have co-evolved among the Eudicots.**

323       Among the Angiosperms, most of the genic PMDs, like MAIN and MAIL1, are standalone  
324 versions [18]. However, some genic PMDs can associate with other protein domains, such as for  
325 instance a PPP domain. In *A. thaliana*, the protein MAIL3, which carries a PMD fused to a PPP domain,  
326 is a close homolog of both MAIN/MAIL1 and PP7/PP7L through its PMD and PPP domains, respectively.  
327 Considering that the PMD proteins MAIN and MAIL1 interact with PP7L, and are required for the  
328 expression of similar set of loci, we decided to determine the distribution of related genic PMD and  
329 PPP domains, and to retrace their evolutionary history among plant species. The *A. thaliana* MAIN,  
330 MAIL1 and MAIL3 are all members of the PMD-C family that also includes MAIL2 [15]. Since our  
331 objective is to retrace the evolution of genic (and not TE-containing) PMD-C, we have decided to

332 restraint our search to Eudicots. Indeed, Eudicot species contain mainly genic PMD-C, while other  
333 angiosperms may contain variable numbers of closely related genic and TE-associated PMD-C motifs  
334 that would be difficult to distinguish in our analysis. To retrace the evolution history of the genic PMD-  
335 C family, we used *A. thaliana* PMD-C genes to search and collect their relatives (paralogues and  
336 orthologues) in 30 genomes representative of the Eudicot diversity (see S11 Table for a list of species  
337 and their corresponding codes used in Fig 8, and S12 Table for motif sequences).

338 In our phylogenetic analysis, the genic PMD-C family can be clearly separated in two major  
339 clades. The first clade is composed of orthologues of *A. thaliana* MAIL2, MAIL1 and MAIN, while the  
340 second one includes orthologues of *A. thaliana* MAIL3 (Fig 8A). MAIL2 orthologues were found in all  
341 species tested, forming a closely related group, which suggests that they are under strong purifying  
342 selection (see the very short branch lengths linking most MAIL2 genes in Fig 8A). In several species,  
343 additional MAIL2 paralogues were also detected. They were either imbedded in the major MAIL2  
344 group, or forming independent and more divergent subgroups, like in the case of MAIL1 and MAIN  
345 that are Brassicaceae-specific MAIL2 paralogues. By comparison, MAIL3 orthologues were not found  
346 in all Eudicot species tested, and, except in Brassicaceae, MAIL3 genes appear to be under much  
347 weaker purifying selection compare to MAIL2 and MAIL2-like genes (see the longer branch lengths in  
348 the tree of Fig 8A). Brassicaceae MAIL3 genes contrast with other MAIL3, by forming a closely related  
349 group in the phylogenetic tree. This suggests a clear change in selection pressure, typical of a  
350 neofunctionalization event that could correlate with the acquisition of the PPP motif by these genes  
351 (Fig 8B and see below). Remarkably, another fusion event between PMD-C and PPP motifs occurred  
352 independently in grapevine, but this time involving a MAIL2 paralogue (VvMAIL2.2, Fig 8A).

353 We then used the PPP motif found in *A. thaliana* MAIL3, to collect orthologous genes and  
354 retrace the evolution history of this motif in the same Eudicot species used above. We confirmed that  
355 these genes can be clearly separated in two distinct clades: PP7 and PP7-like (PP7L) (Fig 8B). All tested  
356 species present one or several closely related PP7 paralogues. Although the Brassicaceae MAIL3 PPP  
357 motif belongs to the PP7 clade, it diverged significantly compared to other standalone PP7 paralogues

358 (Fig 8B). Same observation was made regarding the PP7 domain of VvMAIL2.2. Thus, as described for  
359 the PMD of Brassicaceae MAIL3 and grapevine VvMAIL2.2, this suggests a fast-evolving period and  
360 neofunctionalization of the PP7 domain in these species, subsequently to the PMD-C/PP7 fusion.  
361 Conversely, PP7L orthologues were not found in all species tested and, accordingly, these genes are  
362 under weaker purifying selection compare to genes belonging to the PP7 subfamily. In conclusion,  
363 phylogenetic analyses showed that, in at least Brassicaceae and grapevine, neo-association of PMD-C  
364 and PP7 domains have potentially create new protein functions that were maintained through  
365 evolution.

366

## 367 **DISCUSSION**

368 In *A. thaliana*, MAIN and MAIL1 are standalone PMD proteins that have been involved in  
369 genome integrity, regulation of cell division and differentiation, and silencing of TEs [15-17]. In this  
370 study, we show that TE silencing is widely impaired in the *ddc main-3* higher order mutant, which is  
371 both partially defective in DNA methylation and MAIN activity. We also identify the putative  
372 phosphatase protein PP7L as MAIN and MAIL1 protein interactor, and show that among the loci that  
373 are commonly misregulated in *pmd* and *pp7l* single and double mutants, most of the downregulated  
374 genes carry the 'DOWN' DNA motif in their promoter. Finally, phylogenetic analyses among Eudicots  
375 suggest a mechanism of neofunctionalization between the PMD and PP7-type PPP, to potentially  
376 acquire a functional module that requires the two protein domains.

377

### 378 **The PMD MAIN protein acts independently of DRM2- and CMT3 pathways to silence TEs.**

379 Previous analyses showed that some TEs were synergistically upregulated in the *mail1 rdr2*  
380 double mutant plants, suggesting that MAIL1 acts independently of RdDM pathway [15]. In our whole  
381 genome transcriptomic analyses, we show that several TEs are upregulated in both *main-3* and *ddc*  
382 mutants, and their upregulation is dramatically exacerbated in the *ddc main-3* quadruple mutant (Fig  
383 2 and S2 Fig). We also identify TEs that are upregulated in either *ddc* or *main-3* mutants, but display

384 stronger misregulation in the *ddc main-3* higher order mutant (Fig 2 and S2 Fig). Finally, we identify a  
385 large class of TEs that are only upregulated in *ddc main-3* (Fig 2 and S2 Fig). Altogether, these analyses  
386 reveal complex genetic interaction between the MAIN, DRM2 and CMT3 proteins to silence TE.  
387 Depending on the locus, these proteins act redundantly or synergistically to efficiently silence TE.  
388 Previous work showed that DNA methylation is not impaired in *mail1-1* [15]. We found that DNA  
389 methylation is mostly unaffected in the *main-2* null mutant. However, we detected a mild but  
390 significant hypermethylation at non-CG sites in TEs and pericentromeric genes (Fig 4). One hypothesis  
391 is that CHG and CHH hypermethylation observed in *main-2* is a backup mechanism to compensate for  
392 MAIN loss of function, and to dampen TE silencing defects. Although further studies will be required  
393 to test this hypothesis, it is consistent with the fact that combining the *main-3* and *ddc* mutations  
394 leads to an exacerbation of TE silencing defects. Synergistic effects between different epigenetic  
395 pathways have already been described. For instance, it has been shown that MORPHEUS MOLECULE  
396 1 (MOM1) and MORC1/MORC6 proteins, or MOM1 and the RdDM pathway act synergistically to  
397 efficiently silence TEs [13, 30]. Altogether, these observations contribute to the “mille-feuille” (i.e.  
398 “multiple layers”) model, in which different epigenetic pathways converge towards the silencing of  
399 TEs [31].

400

401 **The putative phosphatase PP7L interacts with the PMD MAIN and MAIL1 protein to regulate a**  
402 **similar set of genes and TEs.**

403 Recently, the putative phosphoprotein phosphatase PP7L was involved in the biogenesis of  
404 chloroplasts and plant response upon abiotic stress [25]. Here, we show that PP7L interact with MAIN  
405 and MAIL1, and *main-2*, *pp7l-2*, *mail1-1* single and *mail1-1 pp7l-2* double mutant plants display similar  
406 developmental and molecular phenotypes (Fig 5 and 6). We also show that, as described for *main-2*  
407 and *mail1-1* [15], the subnuclear distribution of chromocenters and H3K9me2 are unaltered in *pp7l-2*  
408 (Fig 7). The 106B pericentromeric repeats appeared decondensed in the two *pmd* mutants [15], future  
409 work will determine if similar phenotype is observed in *pp7l-2*. Although MAIN, MAIL1 and PP7L



410 interact together, we cannot exclude that an additional protein is required for the interaction. In  
411 addition, PP7L may have additional partners independently of MAIN and MAIL1. Further biochemical  
412 studies such as IP-MS analyses using the FLAG-tagged PP7L line will contribute to addressing these  
413 points.

414 Transcriptomic analyses revealed complex genetic interaction between MAIN, MAIL1 and PP7L;  
415 the three proteins acting either independently or together to ensure the proper expression of genes,  
416 and to perform TE silencing. Moreover, transcriptome profiling of *mail1-1 pp7l-2* double mutant  
417 revealed that the two mutations may have synergistic effects, specifically at genes that are  
418 upregulated in the mutant. To further study the genetic interaction between the three proteins, it will  
419 be important to analyze the transcriptome of *main-2 mail1-1 pp7l-2* triple mutant. Altogether and  
420 considering that *i*) MAIN, DRM2 and CMT3 pathways genetically interact together, and *ii*) the *main-2*  
421 mutant show a slight increase in DNA methylation at CHG and CHH sites, we cannot rule out that MAIN  
422 is playing a dual role: regulating gene expression through its interaction with MAIL1 and PP7L, and  
423 involved in TE silencing through its genetic interaction with DNA methylation. In the future, it will be  
424 important to analyze DNA methylation in *pp7l-2*, but also in *pmd pp7l-2* higher order mutants. In  
425 parallel, studying the *ddc pp7l-2* mutant will allow to further decipher the genetic interaction between  
426 the PP7L and DNA methylation pathways.

427

428 **Genes that are commonly downregulated in *main*, *mail1* and *pp7l* mutants carry the ‘DOWN’ motif**  
429 **in their promoters.**

430 Genes that are commonly downregulated in the different *pmd* and *pp7l* mutant backgrounds  
431 show a bigger overlap than other misregulated loci (Fig 6, and S8 Table). Furthermore, eighteen out  
432 of nineteen genes commonly downregulated in the all the mutant backgrounds carry the ‘DOWN’ DNA  
433 motif in their promoter (S5 Fig). The ‘DOWN’ motif is also found in the promoter of genes reproducibly  
434 downregulated in *main-2*, *mail1-1*, *main-3* and *ddc main-3*. However, it is not significantly enriched in  
435 the promoter of genes identified as downregulated in the *pmd* and *pp7l* mutants from the RNA-seq

436 Exp3. One explanation for this discrepancy is that too many loci were identified as downregulated in  
437 each dataset of the RNA-seq Exp3, which created a dilution of the loci carrying the 'DOWN' motif in  
438 their promoter. In the future, further RNA-seq experiments in *pp7l-2* and *mail1-1 pp7l-2* will precise  
439 the lists of reproducibly misregulated loci in these mutant backgrounds.

440 Based on our results, we hypothesize that the 'DOWN' motif may act as a putative cis-  
441 regulatory element (CRE) recognized by an unidentified TF, which would be required for the  
442 transcription of genes identified as downregulated in *pmd* and *pp7l* mutants. This unknown TF could  
443 be recruited or activated by the MAIN/MAIL1/PP7L protein complex. Another hypothesis is that the  
444 'DOWN' motif is directly recognized by the MAIN/MAIL1/PP7L protein complex. Further study will be  
445 required to test if MAIN/MAIL1/PP7L protein complex interact with chromatin, and bind the 'DOWN'  
446 motif. In parallel, further biochemical analyses may allow to identify an uncharacterized putative TF  
447 as MAIN/MAIL1/PP7L protein interactor.

448

#### 449 **The association of PMD-C and PP7/PP7L domains creates a functional protein module.**

450 In this study, we identified PP7L has a protein partner of the two standalone PMDs MAIN and  
451 MAIL1, and showed that these proteins are required for the proper expression of a common set of  
452 genes, and for TE silencing. Besides, we showed that the Brassicaceae MAIL3 and the grapevine  
453 VvMAIL2.2 proteins carry a PMD fused to a PP7 domain. Based on these results, we hypothesize that  
454 depending on the configuration, the association of PMD-C and PP7/PP7L domains would create a  
455 functional protein module in trans or in cis. It is likely that the cis-association of PMD and PP7 found  
456 in the Brassicaceae MAIL3 proteins occurred in the common ancestors of this Eudicot lineage, possibly  
457 through the process of gene duplication. Since then, the MAIL3 PMD/PP7 fusion was maintained  
458 under strong purifying selection, arguing for a neofunctionalization of the fusion protein. It is likely  
459 that a similar process happened in grapevine, and possibly, in closely related Vitaceae species. To  
460 some extent, the two distinct events that occurred in Brassicaceae and grapevine are reminiscent of  
461 convergent evolution processes leading to the production of a functional PMD/PP7 module.

462 The occurrence of PMD and PP7/PP7L protein fusion in several Brassicaceae and grapevine is  
463 reminiscent of the concept of Rosetta stone chimera proteins, which describes that two proteins  
464 interacting together in one organism can be found fused together in another species to facilitate  
465 enzymatic activity [32]. There are several examples of Rosetta stone proteins, described for instance  
466 with different subunits of DNA topoisomerase or RNA polymerase [32]. Here, we show that, at least  
467 in *A. thaliana*, the Rosetta stone chimera MAIL3 coexist with its close homologs MAIN/MAIL1 and PP7L  
468 that interact together. The fact that the PMD and PP7 domains are fused together in MAIL3 may be a  
469 strategy to optimize protein activity. Conversely, the enzymatic activity of the MAIN/MAIL1/PP7L  
470 protein complex could be further regulated by allowing, or not, the three proteins to interact together.  
471 Nevertheless, in both scenarios, it is likely that PMD and PP7/PP7L association creates a functional  
472 protein module, which might be specialized in distinct biological processes depending on its  
473 composition. Thus, we hypothesize that the MAIL3 and MAIN/MAIL1/PP7L protein complexes play  
474 different role in the plant. This is consistent with the fact that, unlike *main-2*, *mail1-1* and *pp7l-2*  
475 mutant, the *mail3-2* mutant does not show abnormal developmental phenotype [17]. Further studies  
476 will be required to describe the role of MAIL3 in the plants.

477 In conclusion, we show here that the two *A. thaliana* PMD MAIN and MAIL1 proteins interact with  
478 PP7L, and are involved in the regulation of a common set of genes and TEs. In addition, we show that  
479 distinct events of PMD-C and PP7 fusions have occurred among the Eudicots (among several  
480 Brassicaceae species and in grapevine), suggesting some convergent evolution processes and a  
481 potential neofunctionalization of PMD/PP7 module in cis. The biological significance of PMD/PP7  
482 fusion proteins will be investigated in the future by studying the role of MAIL3 in *A. thaliana*. In  
483 addition, it will be important to determine whether the PMD proteins play important roles in other  
484 plant species with agronomic value.

485

## 486 MATERIALS AND METHODS

487

488 **Plant material and growing conditions.** Wild-type (WT) and all mutant lines are in the Columbia (Col)  
489 ecotype. The *drm1-2* (SALK\_031705), *drm2-2* (SALK\_150863), *cmt3-11* (SALK\_148381), *ddc* triple,  
490 *main-2* (GK-728H05), *mail1-1* (GK-840E05) and *pp7l-2* (SALK\_003071) null mutant lines were  
491 previously described [15-17, 25, 26], and obtained from The Nottingham Arabidopsis Stock Centre.  
492 The *mail1-1 pp7l-2* double mutant was obtained by crossing the respective single mutants. T-DNA  
493 insertions were confirmed by PCR-based genotyping and RT-qPCR analyses. The *main-3* mutation was  
494 genotyped by derived cleaved amplified polymorphic sequences (dCAPS) using the restriction enzyme  
495 FokI. Primer sequences are described in S13 Table. All the WT Col and T-DNA mutant plants were  
496 grown on soil under a 16h-light/8h-dark cycle. When experiments required to screen for GFP  
497 expression under UV light, plants carrying the *ATCOPIA28::GFP* transgene were first grown on  
498 Murashige and Skoog (MS) plates under continuous light, 10-day old plants were then screened for  
499 GFP expression under UV light, and subsequently transferred onto soil. For *in vitro* plant culture, seeds  
500 were surface-sterilized and sowed on solid MS medium containing 0.5% sucrose (w/v).

501  
502 **Cloning of *ATCOPIA28::GFP*.** The pCambia3300-NLS-GFP-T35S vector was previously described [12].  
503 The 5'LTR promoter corresponding to a region of ~1 kb upstream of *ATCOPIA28* (*AT3TE51900*) was  
504 PCR amplified from WT genomic DNA, and cloned into pCR2.1 TOPO vector (Invitrogen). Quikchange  
505 site-directed mutagenesis (Stratagene) was performed according to Manufacturer's instruction to  
506 create a polymorphism site (MfeI→NdeI) within the 5'LTR promoter, which was subsequently  
507 mobilized into pCambia3300 upstream of NLS-GFP-T35S sequence. *ddc* triple mutant plants were  
508 transformed with the *ATCOPIA28::GFP* construct using the *Agrobacterium*-mediated floral dip  
509 method [33]. Transgenic plants showing GFP fluorescence were backcrossed with a WT plant to  
510 promote the silencing of *ATCOPIA28::GFP* in the F1 generation. F1 plants were self-crossed and their  
511 F2 progenies were screened for GFP fluorescence, and PCR-based genotyped to obtain  
512 *ATCOPIA28::GFP* WT and *ATCOPIA28::GFP ddc* plants. Primer sequences used for *ATCOPIA28::GFP*  
513 cloning and PCR genotyping are described in S13 Table.

514

515 **EMS mutagenesis, GFP screening and mapping analyses.** Five thousand seeds of *ATCOPIA28::GFP ddc*  
516 were mutagenized in 0.26% EMS solution for 12 hours with rotation. Seeds were subsequently washed  
517 with water and sown on soil. Fifteen hundred M2 populations were collected, and subsequently  
518 screened for GFP fluorescence under UV light using a SMZ18 Nikon Fluorescence Stereomicroscope  
519 coupled with the C-HGFI intensilight fluorescence filter. Pictures were taken using the DS Qi1MC digital  
520 camera kit. Mapping and identification of the EMS mutation responsible for the phenotype were  
521 performed by bulk segregant analysis coupled with deep genome re-sequencing as previously  
522 described [12], with the following differences. Reads were mapped against the reference genome  
523 (*Arabidopsis* TAIR10) and single nucleotide polymorphisms called in Geneious (Biomatters). Using R,  
524 single nucleotide polymorphisms were filtered for EMS mutations (G:C→A:T) and zygosity called  
525 based on the variant frequency provided by Geneious (≥80% homozygous mutation, ≥45%, and ≤55%  
526 heterozygous mutation). Plots were then created by calculating the ratio of the number of  
527 homozygous and heterozygous and mutations in a 500-kb window as previously described [34].

528

529 **Cloning of epitope-tagged versions of PMD and PP7L proteins.** *MAIN*, *MAIL1* and *PP7L* genomic  
530 regions were PCR amplified and FLAG or Myc epitopes were added to the C-terminus of each protein  
531 as previously described [12]. Each time, the amplified region includes a ~1Kb promoter sequence  
532 upstream of the respective transcriptional start site. For the *MAIN* promoter, a *MluI* site was modified  
533 to allow LR reaction without changing the sequence integrity of the gene. *main-2*, *mail1-1* and *pp7l-2*  
534 mutant plants were transformed with the *MAIN-FLAG*, *MAIN-MYC*, *MAIL1-MYC* and *PP7L-*  
535 *FLAG* constructs using the *Agrobacterium*-mediated floral dip method [33]. Primer sequences are  
536 described in S13 Table.

537

538 **IP and MS analysis.** Ten grams of 3-week-old seedling tissue were ground in liquid nitrogen and  
539 resuspended in 50mL ice-cold IP buffer [50mM Tris HCl pH 7.6, 150mM NaCl, 5mM MgCl<sub>2</sub>, 0.1%

540 Nonidet P-40, 10% glycerol (v/v), 0.5mM DTT, 1x Protease Inhibitor Mixture (Roche)] and centrifuged  
541 2 times for 15 min at 4°C at 15 350g. 400µL of M2 magnetic FLAG-beads (Sigma, M8823) were added  
542 to the supernatants, and incubated for 90min rotating at 4°C. M2 magnetic FLAG-beads were washed  
543 seven times in ice-cold IP buffer for 5 min rotating at 4°C, and immunoprecipitated proteins were  
544 eluted 3 times with 150µL 3x-FLAG peptides (Sigma, F4799) for 25 min each at 25°C. The eluted protein  
545 complexes were precipitated by trichloroacetic acid and subjected to MS analyses as previously  
546 described [13]. Peptide and protein-level false discovery rates were calculated by the DTASelect  
547 algorithm using the decoy database approach. Based on a peptide PSM level p-value filter of less than  
548 0.01 and a requirement for at least two peptides per protein, the protein-level false discovery rate  
549 was less than 1% for all proteins detected.

550

551 **Co-IP and immunoblotting.** 0.5 g of 3-week-old seedling tissue were ground in liquid nitrogen,  
552 resuspended in 1.5mL ice-cold IP buffer [50mM Tris pH 7.6, 150mM NaCl, 5mM MgCl<sub>2</sub>, 0.1% Nonidet  
553 P-40, 10% glycerol, 0.5 mM DTT, 1x Protease Inhibitor Mixture (Roche)], and centrifuged 2 times for  
554 15 min at 4°C, 16 000g. 50µL M2 magnetic FLAG-beads (Sigma, M8823) were added to the  
555 supernatants and incubated for 2 hour rotating at 4°C. Beads were washed 3 times in ice-cold IP buffer  
556 for 10 min rotating at 4°C. Immunoprecipitated proteins were denatured in Laemmli buffer for 5min  
557 at 95°C. 10µL of input and bead elution were run on 10% SDS-PAGE gels, and proteins were detected  
558 by western blotting using either Anti-FLAG M2 monoclonal antibody-peroxidase conjugate (Sigma,  
559 A8592) at a dilution of 1:10000, or c-Myc rat monoclonal antibody (Chromotek, 9E1-100) at a dilution  
560 of 1:1000 followed by goat anti-rat IgG horseradish peroxidase (Abcam, ab205720) used at a dilution  
561 of 1:20000 as secondary antibody. Western blots were developed using Substrat HRP Immobilon  
562 Western (Merck Millipore, WBKLS0500).

563

564 **RNA extraction.** Total RNA was extracted from aerial parts of 3-week-old seedlings grown on soil using  
565 either RNeasy Plant Mini Kit (Qiagen, 74904) or Monarch Total RNA Miniprep Kit (NEB, T2010)  
566 according to the manufacturer's protocols.

567

568 **RNA sequencing.** RNA-seq libraries were generated from 1 $\mu$ g of input RNA using NEBNext Ultra II  
569 Directional RNA Library Prep Kit for Illumina (NEB, E7490) according to the manufacturer's protocols.  
570 Libraries were sequenced on an Illumina HiSeq 4000 or NextSeq 550 machines. Reads were trimmed  
571 using Trimmomatic [35], and mapped to the *A. thaliana* genome (*Arabidopsis* TAIR10 genome) using  
572 HISAT2 [36]. The sequence alignment files were sorted by name and indexed using SAMtools [37].  
573 Files were converted to BAM files and number of reads mapped onto a gene calculated using HTSeq-  
574 count [38]. Differentially expressed genes were obtained with DESeq2 [39], using a log<sub>2</sub> fold-change  
575  $\geq 2$  (up-regulated genes) or  $\leq -2$  (down-regulated genes) with an adjusted *p*-value of 0,01. Re-analyses  
576 of previously published RNA-seq datasets from *main-2* and *mail1-1* (PRJEB15202) [15] were  
577 performed as described above.

578

579 **RT-qPCR.** 1  $\mu$ g of input RNA was converted to cDNA using GoScript Reverse Transcriptase (Promega  
580 A501C) according to the manufacturer's protocol. The final reaction was diluted 6 times with RNase  
581 free water. RT-qPCR experiments were performed with 4 $\mu$ L of cDNA combined to the Takyon No Rox  
582 SYBR MasterMix (Eurogentec, UF-NSMT-B0701), using a LightCycler 480 instrument (Roche).  
583 Amplification conditions were as follows: 95°C 5 min; 45 cycles, 95°C 15s, 60°C 15s, 72°C 30s; melting  
584 curves. RT-qPCR analyses used the  $2^{-\Delta\Delta Ct}$  method. For each analysis,  $\Delta Ct$  was first calculated based on  
585 the housekeeping *RHIP1* gene Ct value [40].  $\Delta\Delta Ct$  were then obtained by subtracting the wt  $\Delta Ct$  from  
586 the  $\Delta Ct$  of each sample. Values were represented on bar charts relative to WT. Three technical  
587 replicates were performed per biological replicate, and 3 biological replicates were used in all  
588 experiments, unless otherwise stated. Primer sequences are described in S13 Table.

589

590 **DNA motif detection.** The motifs for enhancer sequences (1kb upstream the TSS) were discovered  
591 using MEME (Multiple Em for Motif Elicitation). MEME represents motifs as position-dependent  
592 letter-probability matrices which describe the probability of each possible letter at each position in  
593 the pattern [41].

594

595 **Bisulfite sequencing.** Genomic DNA was extracted from aerial parts of 3-week-old seedlings using  
596 Quick-DNA Plant/Seed Miniprep Kit (Zymo research, D6020) according to the manufacturer's protocol.  
597 Whole genome bisulfite sequencing (WGBS) library was prepared from 50 ng genomic DNA using  
598 NuGen Ovation Ultralow Methyl-Seq kit. Bisulfite treatment was carried out by Qiagen Epitect bisulfite  
599 kit. WGBS libraries were sequenced on an Illumina HiSeq 4000 machine. The raw reads (single end)  
600 were trimmed using Trimmomatic in order to remove adapter sequences [35]. The remaining  
601 sequences were aligned against the *A. thaliana* genome TAIR10 version using Bismark [42]. Duplicated  
602 reads were collapsed into one read. For visualization of the data, we used ViewBS [43].

603

604 **Sequence selection, multiple sequences alignments and phylogenetic reconstruction.**

605 Blast searches (blastp) were performed starting from known *A. thaliana* PMD-C and PP7/PP7L motifs  
606 on the thirty species representing the diversity of the Eudicot lineages. When necessary tblastn  
607 searches were also used to obtain complete protein sequences. To build the phylogenetic trees, PMD-  
608 C or PP7/PP7L motifs were aligned using the multiple sequence comparison by log-expectation  
609 (MUSCLE v3.7) software [44]. Trees were reconstructed using the fast-maximum likelihood tree  
610 estimation program PHYML [45] using the LG amino acids replacement matrix [46]. Statistical support  
611 for the major clusters were obtained using the approximate likelihood-ratio test (aLRT) [47].

612

613 **Immunofluorescence and DAPI-staining.** Leaves from 3-week-old plants, were fixed for 20 min  
614 rotating at 4°C in 2% formaldehyde in Tris buffer (10 mM Tris-HCl pH 7.5, 10 mM EDTA, 100 mM NaCl),  
615 washed two times for 10 min rotating at 4°C in cold Tris buffer and subsequently chopped in LB01



616 buffer (15 mM Tris-HCl pH 7.5, 2 mM EDTA, 0.5 mM spermine, 80 mM KCl, 20mM NaCl and 0.1%  
617 Triton- X-100). Nuclei were filtered through a 30 µm cell strainer cap (Sysmex, 04-0042-2316) and 5µl  
618 of the nuclei solution was diluted in 10 µl of sorting buffer (100mM Tris-HCl pH 7.5, 50 mM KCl, 2 mM  
619 MgCl<sub>2</sub>, 0.05% Tween-20 and 5% sucrose). 20µl of the nuclei dilution were spread onto a polylysine  
620 slide and air-dried for 40 min. Slides were post-fixed in 2% formaldehyde in 1X PBS for 5 min and  
621 washed 2 times with water. Slides were incubated 15 min in 1X PBS, 0.5% Triton X-100 at RT and  
622 washed 3 times with 1X PBS for 5 min. For detection, slides were incubated over night with a mouse  
623 anti-H3K9me<sub>2</sub> monoclonal antibody (Abcam, Ab 1220) at 1:500 in 3% BSA, 0.05% Tween in 1X PBS at  
624 4°C in a moist chamber. After 3 washes in 1X PBS for 5 min, slides were incubated 2h with a goat anti-  
625 mouse antibody coupled to Alexa fluor 568 (Invitrogen, A11004) at 1:1000 in 3% BSA, 0.05% Tween in  
626 1X PBS in a moist chamber. Slides were washed 1 time 5 min with 1X PBS, 1 time 10 min with 1X PBS,  
627 1µg/mL DAPI, and 1 time 5 min with 1X PBS. DNA was counterstained with 1µg/mL DAPI in Vectashield  
628 mounting medium (Vector Laboratories). Observation and imaging were performed using a LSM 700  
629 epifluorescence microscope (Zeiss).

630

631 **Data availability.** Nucleotide sequencing data generated in this study have been deposited in  
632 European Nucleotide Archive (ENA) under the accession number PRJEB33240  
633 (<http://www.ebi.ac.uk/ena/data/view/PRJEB33240>). The proteomics data have been deposited to the  
634 MassIVE data repository (<https://massive.ucsd.edu>) with the dataset identifier MSV000084089. All  
635 other data and material are available within the manuscript and its supplementary files, or from the  
636 corresponding author upon request.

637

## 638 **ACKNOWLEDGMENTS**

639 The authors want to thank Thierry Lagrange, Frederic Pontvianne and other team members for fruitful  
640 discussions, and all the LGDP platform members for their outstanding technical assistance and plant  
641 care. This study is set within the framework of the "Laboratoires d'Excellences (LABEX)" TULIP (ANR-

642 10-LABX-41). S.E.J. is an investigator of the Howard Hughes Medical Institute.

643

## 644 REFERENCES

645

- 646 1. Grewal SI, Jia S. Heterochromatin revisited. *Nat Rev Genet.* 2007;8(1):35-46.
- 647 2. Slotkin RK, Martienssen R. Transposable elements and the epigenetic regulation of the  
648 genome. *Nat Rev Genet.* 2007;8(4):272-85.
- 649 3. Deniz O, Frost JM, Branco MR. Regulation of transposable elements by DNA modifications.  
650 *Nat Rev Genet.* 2019;20(7):417-31.
- 651 4. Dergai O, Hernandez N. How to Recruit the Correct RNA Polymerase? Lessons from snRNA  
652 Genes. *Trends Genet.* 2019;35(6):457-69.
- 653 5. Law JA, Jacobsen SE. Establishing, maintaining and modifying DNA methylation patterns in  
654 plants and animals. *Nat Rev Genet.* 2010;11(3):204-20.
- 655 6. Matzke MA, Mosher RA. RNA-directed DNA methylation: an epigenetic pathway of  
656 increasing complexity. *Nat Rev Genet.* 2014;15(6):394-408.
- 657 7. Wendte JM, Pikaard CS. The RNAs of RNA-directed DNA methylation. *Biochim Biophys Acta.*  
658 2016.
- 659 8. Du J, Johnson LM, Jacobsen SE, Patel DJ. DNA methylation pathways and their crosstalk with  
660 histone methylation. *Nat Rev Mol Cell Biol.* 2015;16(9):519-32.
- 661 9. Zhang H, Lang Z, Zhu JK. Dynamics and function of DNA methylation in plants. *Nat Rev Mol*  
662 *Cell Biol.* 2018;19(8):489-506.
- 663 10. Zemach A, Kim MY, Hsieh PH, Coleman-Derr D, Eshed-Williams L, Thao K, et al. The  
664 *Arabidopsis* nucleosome remodeler DDM1 allows DNA methyltransferases to access H1-containing  
665 heterochromatin. *Cell.* 2013;153(1):193-205.
- 666 11. Stroud H, Do T, Du J, Zhong X, Feng S, Johnson L, et al. Non-CG methylation patterns shape  
667 the epigenetic landscape in *Arabidopsis*. *Nat Struct Mol Biol.* 2014;21(1):64-72.
- 668 12. Moissiard G, Cokus SJ, Cary J, Feng S, Billi AC, Stroud H, et al. MORC family ATPases required  
669 for heterochromatin condensation and gene silencing. *Science.* 2012;336(6087):1448-51.
- 670 13. Moissiard G, Bischof S, Husmann D, Pastor WA, Hale CJ, Yen L, et al. Transcriptional gene  
671 silencing by *Arabidopsis* microorchidia homologues involves the formation of heteromers. *Proc Natl*  
672 *Acad Sci U S A.* 2014;111(20):7474-9.
- 673 14. Lorkovic ZJ, Naumann U, Matzke AJ, Matzke M. Involvement of a GHKL ATPase in RNA-  
674 directed DNA methylation in *Arabidopsis thaliana*. *Curr Biol.* 2012;22(10):933-8.
- 675 15. Ikeda Y, Pelissier T, Bourguet P, Becker C, Pouch-Pelissier MN, Pogorelnik R, et al.  
676 *Arabidopsis* proteins with a transposon-related domain act in gene silencing. *Nat Commun.*  
677 2017;8:15122.
- 678 16. Wenig U, Meyer S, Stadler R, Fischer S, Werner D, Lauter A, et al. Identification of MAIN, a  
679 factor involved in genome stability in the meristems of *Arabidopsis thaliana*. *Plant J.* 2013;75(3):469-  
680 83.
- 681 17. Uhlken C, Horvath B, Stadler R, Sauer N, Weingartner M. MAIN-LIKE1 is a crucial factor for  
682 correct cell division and differentiation in *Arabidopsis thaliana*. *Plant J.* 2014;78(1):107-20.
- 683 18. Babu MM, Iyer LM, Balaji S, Aravind L. The natural history of the WRKY-GCM1 zinc fingers  
684 and the relationship between transcription factors and transposons. *Nucleic Acids Res.*  
685 2006;34(22):6505-20.
- 686 19. Steinbauerova V, Neumann P, Novak P, Macas J. A widespread occurrence of extra open  
687 reading frames in plant Ty3/gypsy retrotransposons. *Genetica.* 2011;139(11-12):1543-55.
- 688 20. Farkas I, Dombradi V, Miskei M, Szabados L, Koncz C. *Arabidopsis* PPP family of  
689 serine/threonine phosphatases. *Trends Plant Sci.* 2007;12(4):169-76.

- 690 21. Sun X, Kang X, Ni M. Hypersensitive to red and blue 1 and its modification by protein  
691 phosphatase 7 are implicated in the control of Arabidopsis stomatal aperture. *PLoS Genet.*  
692 2012;8(5):e1002674.
- 693 22. Liu HT, Li GL, Chang H, Sun DY, Zhou RG, Li B. Calmodulin-binding protein phosphatase PP7 is  
694 involved in thermotolerance in Arabidopsis. *Plant Cell Environ.* 2007;30(2):156-64.
- 695 23. Genoud T, Santa Cruz MT, Kulisic T, Sparla F, Fankhauser C, Metraux JP. The protein  
696 phosphatase 7 regulates phytochrome signaling in Arabidopsis. *PLoS One.* 2008;3(7):e2699.
- 697 24. Uhrig RG, Labandera AM, Moorhead GB. Arabidopsis PPP family of serine/threonine protein  
698 phosphatases: many targets but few engines. *Trends Plant Sci.* 2013;18(9):505-13.
- 699 25. Xu D, Marino G, Klingl A, Enderle B, Monte E, Kurth J, et al. Extrachloroplastic PP7L Functions  
700 in Chloroplast Development and Abiotic Stress Tolerance. *Plant Physiol.* 2019.
- 701 26. Stroud H, Greenberg MV, Feng S, Bernatavichute YV, Jacobsen SE. Comprehensive analysis  
702 of silencing mutants reveals complex regulation of the Arabidopsis methylome. *Cell.* 2013;152(1-  
703 2):352-64.
- 704 27. Franz P, de Jong H. From nucleosome to chromosome: a dynamic organization of genetic  
705 information. *Plant J.* 2011;66(1):4-17.
- 706 28. Zhao S, Cheng L, Gao Y, Zhang B, Zheng X, Wang L, et al. Plant HP1 protein ADCP1 links  
707 multivalent H3K9 methylation readout to heterochromatin formation. *Cell Res.* 2019;29(1):54-66.
- 708 29. Tessadori F, Schulkes RK, van Driel R, Franz P. Light-regulated large-scale reorganization of  
709 chromatin during the floral transition in Arabidopsis. *Plant J.* 2007;50(5):848-57.
- 710 30. Yokthongwattana C, Bucher E, Caikovski M, Vaillant I, Nicolet J, Mittelsten Scheid O, et al.  
711 MOM1 and Pol-IV/V interactions regulate the intensity and specificity of transcriptional gene  
712 silencing. *Embo J.* 2002;21(2):340-51.
- 713 31. Rigal M, Mathieu O. A "mille-feuille" of silencing: epigenetic control of transposable  
714 elements. *Biochim Biophys Acta.* 2011;1809(8):452-8.
- 715 32. Galperin MY, Koonin EV. Who's your neighbor? New computational approaches for  
716 functional genomics. *Nat Biotechnol.* 2000;18(6):609-13.
- 717 33. Clough SJ, Bent AF. Floral dip: a simplified method for *Agrobacterium*-mediated  
718 transformation of *Arabidopsis thaliana*. *Plant J.* 1998;16(6):735-43.
- 719 34. Hristova E, Fal K, Klemme L, Windels D, Bucher E. HISTONE DEACETYLASE6 Controls Gene  
720 Expression Patterning and DNA Methylation-Independent Euchromatic Silencing. *Plant Physiol.*  
721 2015;168(4):1298-308.
- 722 35. Bolger AM, Lohse M, Usadel B. Trimmomatic: a flexible trimmer for Illumina sequence data.  
723 *Bioinformatics.* 2014;30(15):2114-20.
- 724 36. Kim D, Langmead B, Salzberg SL. HISAT: a fast spliced aligner with low memory  
725 requirements. *Nat Methods.* 2015;12(4):357-60.
- 726 37. Li H, Handsaker B, Wysoker A, Fennell T, Ruan J, Homer N, et al. The Sequence  
727 Alignment/Map format and SAMtools. *Bioinformatics.* 2009;25(16):2078-9.
- 728 38. Anders S, Pyl PT, Huber W. HTSeq--a Python framework to work with high-throughput  
729 sequencing data. *Bioinformatics.* 2015;31(2):166-9.
- 730 39. Love MI, Huber W, Anders S. Moderated estimation of fold change and dispersion for RNA-  
731 seq data with DESeq2. *Genome Biol.* 2014;15(12):550.
- 732 40. Czechowski T, Stitt M, Altmann T, Udvardi MK, Scheible WR. Genome-wide identification and  
733 testing of superior reference genes for transcript normalization in Arabidopsis. *Plant Physiol.*  
734 2005;139(1):5-17.
- 735 41. Bailey TL, Boden M, Buske FA, Frith M, Grant CE, Clementi L, et al. MEME SUITE: tools for  
736 motif discovery and searching. *Nucleic Acids Res.* 2009;37(Web Server issue):W202-8.
- 737 42. Krueger F, Andrews SR. Bismark: a flexible aligner and methylation caller for Bisulfite-Seq  
738 applications. *Bioinformatics.* 2011;27(11):1571-2.
- 739 43. Huang X, Zhang S, Li K, Thimmapuram J, Xie S, Wren J. ViewBS: a powerful toolkit for  
740 visualization of high-throughput bisulfite sequencing data. *Bioinformatics.* 2018;34(4):708-9.

- 741 44. Edgar RC. MUSCLE: multiple sequence alignment with high accuracy and high throughput.  
742 Nucleic Acids Res. 2004;32(5):1792-7.  
743 45. Guindon S, Gascuel O. A simple, fast, and accurate algorithm to estimate large phylogenies  
744 by maximum likelihood. Syst Biol. 2003;52(5):696-704.  
745 46. Le SQ, Gascuel O. An improved general amino acid replacement matrix. Mol Biol Evol.  
746 2008;25(7):1307-20.  
747 47. Anisimova M, Gascuel O. Approximate likelihood-ratio test for branches: A fast, accurate,  
748 and powerful alternative. Syst Biol. 2006;55(4):539-52.  
749 48. Bernatavichute YV, Zhang X, Cokus S, Pellegrini M, Jacobsen SE. Genome-wide association of  
750 histone H3 lysine nine methylation with CHG DNA methylation in *Arabidopsis thaliana*. PLoS ONE.  
751 2008;3(9):e3156.

752

### 753 **FIGURE CAPTIONS**

754 **Fig 1. The *ddc #16* EMS population shows overexpression of *ATCOPIA28::GFP* and upregulation of**  
755 **endogenous TEs.**

756 (A) Schematic representation of the *ATCOPIA28::GFP* transgene. The 5' long terminal repeat (LTR)  
757 promoter region of an *ATCOPIA28* LTR-retrotransposon (*AT3TE51900*) is used to control the  
758 expression of GFP. The construct carries a Nuclear Localization Signal (NLS) to target the GFP in the  
759 nucleus. (B) WT and *drm1 drm2 cmt3 (ddc)* triple mutant plants carrying the *ATCOPIA28::GFP*  
760 transgene showed no and weak GFP fluorescence under UV light, respectively. By comparison, the *ddc*  
761 *#16* EMS mutant showed strong GFP fluorescence. Insets show plants under white light. (C) Western  
762 blot using anti-GFP antibody confirmed *ATCOPIA28::GFP* overexpression in *ddc #16*. Coomassie  
763 staining of the large Rubisco subunit (*rbcl*) is used as a loading control. KDa: kilodalton. (D) Relative  
764 expression analyses of *ATCOPIA28::GFP (GFP)* and three endogenous TEs in *ddc* and *ddc #16* assayed  
765 by Real-Time quantitative PCR (RT-qPCR). RT-qPCR analyses were normalized using the housekeeping  
766 *RHIP1* gene, and transcript levels in the mutants are represented relative to WT. Error bars indicate  
767 standard deviation based on three independent biological replicates. Screening of EMS mutant  
768 populations was done on MS plates to allow for visualization of GFP-positive individuals under UV  
769 light.

770

771 **Fig 2. MAIN, DRM2 and CMT3 act synergistically to repress TEs.**

772 (A) Representative pictures showing the developmental phenotype of 3-week-old *ddc*, *main-3* and *ddc*  
773 *main-3* mutants in comparison to WT plant. (B) Number of upregulated TEs in *ddc*, *main-3* and *ddc*  
774 *main-3*, and classified by TE superfamily. (C) Chromosomal distributions of misregulated loci in *ddc*,  
775 *main-3* and *ddc main-3* over WT. Chromosome arms are depicted in light grey, pericentromeric  
776 regions in dark grey as defined in [48]. Upregulated genes are represented in blue, downregulated  
777 genes in green and TEs are represented in red above the chromosomes (upregulated) or below  
778 (downregulated). (D) Fraction of upregulated TEs in *ddc*, *main-3* and *ddc main-3* located in  
779 chromosome arms or in pericentromeric regions as defined in [48]. Asterisks indicate statistically  
780 significant enrichments of TEs in pericentromeric regions in comparison to the genomic distribution  
781 of all *A. thaliana* TEs (Chi-Square test, \*: p-value $\leq$  0.05, n.s: not significant). (E) Heatmap showing  
782 normalized count reads of upregulated TEs in *ddc*, *main-3* and *ddc main-3* mutants in comparison to  
783 WT plants. (F-G) Relative expression analyses of *ATCOPIA28* (F) and several endogenous TEs (G) in *ddc*,  
784 *main-3*, *ddc main-3*, *cmt3 main-3* and *drm1 drm2 (dd) main-3* assayed by RT-qPCR. RT-qPCR analyses  
785 were normalized using the housekeeping *RHIP1* gene, and transcript levels in the mutants are  
786 represented relative to WT. Error bars indicate standard deviation based on three independent  
787 biological replicates. Analyses described in panels B-E are based on the overlaps of two independent  
788 RNA-seq experiments (EMS Exp1 and Exp2, four biological replicates, S1 and S2 Tables). RNA-seq  
789 threshold:  $\log_2 \geq 2$ , or  $\log_2 \leq -2$ ; p-adj < 0.01.

790

791 **Fig 3. MAIN and MAIL1 are required for the proper expression of similar genes, and for TE silencing.**

792 (A-B) Number of reproducibly misregulated genes (A) and upregulated TEs (B) in *main-2*, *mail1-1* and  
793 *main-3* mutants in comparison to WT plants. TEs are classified by superfamily. (C) Heatmap showing  
794 normalized count reads of misregulated loci in *main-2*, *mail1-1* and *main-3* in comparison to

795 respective WT controls. Asterisks represents loci that are commonly misregulated in the three mutant  
796 backgrounds. (D) Venn diagrams analyses representing the overlaps between misregulated loci in  
797 *main-2*, *mail1-1* and *main-3*. Fisher's exact test statistically confirmed the significance of Venn diagram  
798 overlaps (p-value <1,2.10e-14). (E) Fraction of misregulated loci in *main-2* and *mail1-1* located in  
799 chromosome arms or in pericentromeric regions as defined in [48]. Asterisks indicate statistically  
800 significant enrichments of downregulated genes and upregulated TEs in chromosome arms and  
801 pericentromeric regions, respectively, in comparison to the genomic distributions of all *A. thaliana*  
802 genes and TEs (Chi-Square test, \*: p-value≤ 0.05, \*\*: p-value≤ 0.01, n.s: not significant). Percentages  
803 of DNA-methylated genes were calculated based on whole genome bisulfite sequencing (BS-seq) of  
804 WT plants described in [26]. n.d.: not determined. Analyses are based on the overlaps of three  
805 independent RNA-seq experiments (Exp1 and Exp2, two biological replicates each, and Exp3, four  
806 biological replicates, S3 and S4 Tables). RNA-seq threshold:  $\log_2 \geq 2$ , or  $\log_2 \leq -2$ ; p-adj < 0.01.

807

808 **Fig 4. The *main-2* mutation has a slight effect on non-CG DNA methylation levels.**

809 (A) Genome-wide DNA methylation levels along the five *Arabidopsis* chromosomes in *main-2* versus  
810 WT plants. Chromosome arms are depicted in light grey, pericentromeric regions in dark grey as  
811 defined in [48]. Mb: megabase. (B-H) Boxplot analyses in two *main-2* and WT biological replicates  
812 showing the DNA methylation levels of all pericentromeric TEs (B) and genes (C), all chromosome arms  
813 TEs (D) and genes (E), TEs that are upregulated in *main-2* (F), and genes that are upregulated (G) and  
814 downregulated (H) in *main-2*. p-values were calculated using a Wilcoxon test. \*\*\*: p-value < 2.10e-16.

815

816 **Fig 5. MAIN, MAIL1 and PP7L physically interact together.**

817 (A) Representative pictures of 3-week-old *main-2* and *mail1-1* mutants, and epitope-tagged  
818 complementing lines in comparison to WT Col plants. (B) Western blots using anti-FLAG and anti-Myc

819 antibodies showing the accumulation of epitope-tagged PMD proteins at the expected sizes in the  
820 different complementing lines. Coomassie staining of the large Rubisco subunit (rbcl) is used as a  
821 loading control. KDa: kilodalton. (C-E) Relative expression analyses of upregulated TEs (C), upregulated  
822 genes (D) and downregulated genes (E) in the different complementing lines assayed by RT-qPCR. RT-  
823 qPCR analyses were normalized using the housekeeping *RHIP1* gene, and transcript levels in the  
824 complementing lines and mutants are represented relative to WT Col. Error bars indicate standard  
825 deviation based on three independent biological replicates. (F) FLAG-tagged MAIN and MAIL1 proteins  
826 were immunoprecipitated and putative interacting proteins were identified by mass spectrometry.  
827 Numbers of identified spectra, peptides and the normalized spectral abundance factor (NSAF<sub>5</sub>) are  
828 shown for two independent experiments, including three *main-2* and two *mail1-1* replicates. WT  
829 replicates are used as a negative control. Only proteins reproducibly enriched in all the FLAG-MAIN  
830 and FLAG-MAIL1 IP, and depleted in WT controls across multiple replicates are described in the table.  
831 (G) MAIL1-MYC was co-immunoprecipitated with MAIN-FLAG in F1 plants obtained by crossing MAIL1-  
832 MYC and MAIN-FLAG lines together. Parental MAIL1-MYC and MAIN-FLAG lines were used as negative  
833 controls. (H) The MAIN-MYC line was supertransformed with the PP7L-FLAG construct, and MAIN-MYC  
834 was co-immunoprecipitated with PP7L-FLAG. Plants expressing only MAIN-MYC or PP7L-FLAG were  
835 used as negative controls. (I) Same as H but using MAIL1-MYC plants supertransformed with the PP7L-  
836 FLAG construct. Epitope-tagged proteins were detected by Western blotting. Arrowheads indicates  
837 expected bands. Asterisks indicates non-specific hybridization. Co-exp: plants co-expressing PP7L-  
838 FLAG and MAIN-MYC (H) or PP7L-FLAG and MAIL1-MYC (I).

839

840 **Fig 6. *main-2*, *mail1-1*, *pp7l-2* single and *mail1-1 pp7l-2* double mutants display similar**  
841 **developmental and molecular phenotypes.**

842 (A) Representative pictures of 3-week-old *main-2*, *mail1-1*, *pp7l-2* single and *mail1-1 pp7l-2* double  
843 mutants in comparison to WT Col plant. (B) Heatmap showing normalized count reads of misregulated

844 loci in *main-2*, *mail1-1*, *pp7l-2* and *mail1-1 pp7l-2* mutants in comparison to WT col plants using the  
845 datasets of RNA-seq Exp3 (4 biological replicates, S3 and S6 Tables). One asterisk defines the loci that  
846 are commonly misregulated in all mutant backgrounds. Two asterisks define the loci that are  
847 misregulated in the *mail1-1 pp7l-2* double mutant. (C) Venn diagrams analyses representing the  
848 overlaps between misregulated loci in *main-2*, *mail1-1*, *pp7l-2* and *mail1-1 pp7l-2*. Fisher's exact test  
849 statistically confirmed the significance of Venn diagram overlaps (p-value < 1.2.10e-14). (D-F) Boxplots  
850 analyses showing average RPKM values of upregulated TEs (D), upregulated genes (E) and  
851 downregulated genes (F) in *mail1-1 pp7l-2* in the indicated genotypes of RNA-seq Exp3. These analyses  
852 are based on the misregulated loci datasets defined by \*\* in panel B. P-values were calculated using  
853 a Wilcoxon test, and only significant p-values are shown. \*: p-value < 1.10e-3; \*\*\*: p-value < 2.10e-16.  
854 (G) Heatmap showing normalized count reads of reproducibly misregulated loci in *main-2* and *mail1-*  
855 *1* in the indicated genotypes of RNA-seq Exp3. Lists of reproducibly misregulated loci in *main-2* and  
856 *mail1-1* were as defined in Fig 3 and S4 Table. One asterisk defines the loci that are commonly  
857 misregulated in *main-2* and *mail1-1* mutants (S5 Table). Two asterisks define subsets of loci that are  
858 commonly misregulated in all the indicated genotypes (S7 Table). (H-J) Relative expression analyses  
859 of upregulated TEs (H), upregulated genes (I) and downregulated genes (J) in the different genotypes  
860 assayed by RT-qPCR. RT-qPCR analyses were normalized using the housekeeping *RHIP1* gene, and  
861 transcript levels in the different mutants are represented relative to WT Col. Error bars indicate  
862 standard deviation based on three independent biological replicates. (K-M) Boxplots analyses showing  
863 average RPKM values of commonly upregulated TEs (K), upregulated genes (L) and downregulated  
864 genes (M) in the indicated genotypes of RNA-seq Exp3. These analyses are based on the commonly  
865 misregulated loci datasets defined by \*\* in panel G. P-value was calculated using a Wilcoxon test. \*\*\*:  
866 p-value < 2.10e-16.

867

868 **Fig 7. Constitutive heterochromatin appears unaltered in *pp7l-2* mutant.**



869 Proportion of nuclei showing condensed, partially decondensed (intermediate), or decondensed  
870 chromocenters in the *pp7l-2* mutant in comparison to WT control (Col) based on H3K9me2  
871 immunostaining of nuclei. Representative pictures of nuclei displaying condensed, partially  
872 decondensed or decondensed chromocenters. DAPI: DNA stained with 4',6-diamidino-2-  
873 phenylindole.

874 **Fig 8. Evolutionary history of PMD-C and PP7 proteins in plants.**

875 (A) An alignment of the PMD-C motifs from 30 representative Eudicot species was used to construct  
876 a phylogenetic tree. The two major clades (MAIL2/MAIL2-like and MAIL3) are indicated. The species  
877 codes are given in S11 Table, and corresponding protein sequences in S12 Table). In red are genes  
878 presenting a fusion between a PMD-C and a PP7 motif. Statistical supports of key nodes calculated  
879 with the approximate likelihood-ratio test are indicated. Scale bar indicates one substitution/site. The  
880 tree was rooted using the *Amborella trichopoda* PMD-C motif (Atr1PMDC). (B) Phylogenetic tree  
881 constructed using an alignment of the PP7 motif from the same species as in (A). The two major clades  
882 (PP7 and PP7L) are indicated. In red are genes presenting a fusion between a PP7 and a PMD-C motif.  
883 Statistical supports of key nodes calculated with the approximate likelihood-ratio test are indicated.  
884 Scale bar indicates one substitution/site. The tree was rooted using the *A. thaliana* PP5 motif (AtPP5).

885

886

## 887 SUPPORTING INFORMATION CAPTIONS

888

889 **S1 Fig. *MAIN* is the mutated gene responsible for *ATCOPIA28::GFP* and TE overexpression in the *ddc***  
890 **#16 mutant.**

891 (A) Representative pictures of *ddc #18* (*ddc morc6-8*) and *ddc #344* (*ddc morc6-9*) mutants in  
892 comparison to *ATCOPIA28::GFP* WT and *ddc* control plants under UV light. Insets show plants under  
893 white light. (B) Enrichment in homozygote/heterozygote ratio of EMS over WT single nucleotide  
894 polymorphisms (SNPs), defining the linkage intervals for the populations *ddc #18* and *ddc #344*. Mb:  
895 megabase. (C) Location of the point mutations corresponding to the *morc6-8* and *morc6-9* alleles  
896 within the *MORC6* genomic sequence. Nucleotide and corresponding amino acid changes are  
897 indicated above the gene. Positions of the mutations are indicated relative to the transcription start  
898 site (+1). Grey boxes represent 5' and 3' UTR, blue boxes and lines represent exons and introns,  
899 respectively. (D) Enrichment in homozygote/heterozygote ratio of EMS over WT single nucleotide  
900 polymorphisms (SNPs), defining the linkage intervals for the population *ddc #16*. (E) Location of the  
901 point mutation corresponding to the *main-3* mutant allele within the *MAIN* genomic sequence. (F)  
902 Genetic complementation analyses using the KO T-DNA insertion line *main-2*. *ddc #16* plants were  
903 crossed with *main-2* plants. F1 plants were self-crossed, and F2 plants were screened under UV light  
904 to select GFP-overexpressing plants. Western blotting using anti-GFP antibodies confirmed GFP  
905 overexpression in selected F2 plants. Coomassie staining of the large Rubisco subunit (*rbcl*) is used as  
906 a loading control. KDa: kilodalton. Among the selected F2 plants, the presence of *main-3* EMS and  
907 *main-2* T-DNA mutant alleles were determined by dCAPS-PCR and PCR analyses, respectively. *DRM2*  
908 and *CMT3* genotyping were determined by PCR analyses. WT: Wild type, Ho: Homozygote mutant. He:  
909 Heterozygote. (G) Relative expression analyses of several TEs in the indicated genotypes assayed by  
910 RT-qPCR. RT-qPCR analyses were normalized using the housekeeping *RHIP1* gene, and transcript levels  
911 in the different genotypes are represented relative to WT. Error bars indicate standard deviation

912 based on two independent biological replicates. Screening of EMS mutant populations was done on  
913 MS plates to allow for visualization of GFP-positive individuals under UV light.

914

915 **S2 Fig. Combining the *drm2*, *cmt3* and *main-3* mutations exacerbate TE silencing defects.**

916 (A) Number of misregulated loci in *ddc*, *main-3* and *ddc main-3* in comparison to *ATCOPIA28::GFP* WT  
917 plants in two independent RNA-seq experiments (EMS Exp1 and Exp2, two biological replicates each,  
918 S1 Table). (B) Principal component analysis (PCA) performed on normalized count reads for first two  
919 components of the sixteen samples described in RNA-seq EMS Exp1 and Exp2. (C) Venn diagrams  
920 analyses defining the reproducibly misregulated loci in the different genotypes based on the overlaps  
921 of loci identified as misregulated in RNA-seq EMS Exp1 and Exp2 (S2 Table). (D) Relative expression  
922 analyses of *ATCOPIA28* and *HELITRONY1D* (*AT5TE35950*) in *ddc*, *main-3* and *ddc main-3* assayed by  
923 RT-qPCR. RT-qPCR analyses were normalized using the housekeeping *RHIP1* gene, and transcript levels  
924 in the different genotypes are represented relative to WT. Error bars indicate standard deviation  
925 based on three independent biological replicates. (E) Venn diagrams analysis showing the overlaps  
926 between reproducibly upregulated TEs in *ddc*, *main-3* and *ddc main-3*. The numbers of reproducibly  
927 upregulated TEs for each genotype were defined by the overlaps of upregulated TEs shown in panel  
928 C. Fisher's exact test statistically confirmed the significance of Venn diagram overlaps (p-value  
929  $<1,2 \cdot 10^{-14}$ ). (F) Same as panel D for TEs defined as class I-IV TEs. Frames of RT-qPCR graphs are using  
930 the same color code as shown in panel E. (G) *top*, Venn diagrams analyses defining the overlaps  
931 between reproducibly up- and downregulated genes in the different genotypes. Reproducibly  
932 misregulated genes were defined based on the overlaps described in panel C. Fisher's exact test  
933 statistically confirmed the significance of Venn diagram overlaps (p-value  $<1,2 \cdot 10^{-14}$ ). *bottom*,  
934 Fraction of misregulated genes in *ddc*, *main-3* and *ddc main-3* located in chromosome arms or in  
935 pericentromeric regions as defined in [48]. Asterisks indicate statistically significant enrichments of  
936 misregulated genes in chromosome arms or pericentromeric regions in comparison to the genomic

937 distributions of all *A. thaliana* genes (Chi-Square test, \*: p-value $\leq$  0.05, \*\*: p-value $\leq$  0.01, n.s.: not  
938 significant). Percentages of DNA-methylated genes were calculated based on whole genome bisulfite  
939 sequencing (BS-seq) of WT plants described in [26]. n.d.: not determined. (H) Relative expression  
940 analyses of *DRM2* and *CMT3* in *ddc*, *main-3*, *ddc main-3*, *cmt3 main-3* and *dd main-3* assayed by RT-  
941 qPCR. RT-qPCR analyses were normalized using the housekeeping *RHIP1* gene, and transcript levels in  
942 the different genotypes are represented relative to WT. Error bars indicate standard deviation based  
943 on three independent biological replicates. Screening of EMS mutant populations was done on MS  
944 plates to allow for visualization of GFP-positive individuals under UV light.

945

946 **S3 Fig. Identification of reproducibly misregulated loci in *main-2*, *mail1-1* and *main-3*.**

947 (A) Number of misregulated loci in *main-2* and *mail1-1* in comparison to WT Col plants in three  
948 independent RNA-seq experiments (Exp1, Exp2 [15], and Exp3; two, two and four biological replicates,  
949 respectively, S3 Table) (B) Principal component analysis (PCA) performed on normalized count reads  
950 for first two components of the twenty-four *main-2*, *mail1-1* and WT Col samples described in RNA-  
951 seq Exp1, Exp2 and Exp3. (C) Venn diagrams analyses defining the reproducibly misregulated loci in  
952 *main-2* and *mail1-1* based on the overlaps of loci identified as misregulated in RNA-seq Exp1, Exp2  
953 and Exp3 (S4 Table). (D-F) Relative expression analyses of several upregulated TEs (D), upregulated  
954 genes (E), and downregulated genes (F) in *main-2*, *mail1-1* and *main-3* assayed by RT-qPCR. RT-qPCR  
955 analyses were normalized using the housekeeping *RHIP1* gene, and transcript levels in the different  
956 genotypes are represented relative to respective WT controls. Error bars indicate standard deviation  
957 based on three independent biological replicates.

958 **S4 Fig. DNA methylation analyses in the *main-2* mutant**

959 (A-B) Boxplot analyses in two *main-2* and WT biological replicates showing the DNA methylation levels  
960 at genomic sites previously defined as hypo CHG differentially methylated regions (DMR) in *cmt3* (A)  
961 and hypo CHH DMR in *drm1 drm2* (B) based on [26]. p-values were calculated using a Wilcoxon test.

962 \*: p-value <5.10e-7, \*\*: p-value <5.10e-10, \*\*\*: p-value < 2.10e-16.

963 **S5 Fig. MAIN, MAIL1 and PP7L are required for the proper expression of similar loci, and commonly**  
964 **downregulated genes carry the 'DOWN' DNA motif in their promoter.**

965 (A) Principal component analysis (PCA) performed on normalized count reads for first two components  
966 of the twenty samples described in RNA-seq Exp3. (B) Number of misregulated loci in the different  
967 genotypes in comparison to WT Col plants from RNA-seq Exp3 (four biological replicates, S3 and S6  
968 Tables). (C) Identification and proportions of the 'DOWN' DNA motif among the promoters of  
969 downregulated genes and all *Arabidopsis* genes using the MEME software. Promoter regions are  
970 defined as 1kb upstream of ATG. The list of all *Arabidopsis* genes used to determine genomic  
971 distributions is based on the TAIR file: TAIR10\_upstream\_1000\_translation\_start\_20101028.

972 **S6 Fig. Full size images of panels described in Fig 5G-I.**

973 **S1 Table. Lists of differentially regulated loci in *ddc*, *main-3* and *ddc main-3* in two independent**  
974 **RNA-seq experiments.**

975

976 **S2 Table. Lists of reproducibly differentially regulated loci in *ddc*, *main-3* and *ddc main-3*.**

977

978 **S3 Table. Lists of differentially regulated loci in *main-2* and *mail1-1* in three independent RNA-seq**  
979 **experiments.**

980

981 **S4 Table. Lists of reproducibly differentially regulated loci in *main-2* and *mail1-1*.**

982

983 **S5 Table. Lists of loci reproducibly and commonly misregulated in *main-2*, *mail1-1* and *main-3*.**

984

985 **S6 Table. Lists of differentially regulated loci in *pp7l-2* and *mail1-1pp7l-2* in RNA-seq Exp3.**

986

987 **S7 Table. Lists of loci commonly misregulated in *main-2*, *mail1-1*, *pp7l-2* and *mail1-1pp7l-2*.**

988

989 **S8 Table. Lists of loci commonly misregulated in all mutant backgrounds analyzed in this study.**

990

991 **S9 Table. Lists of commonly downregulated genes displaying the "DOWN" motif in their promoter**  
992 **and random test analyses.**

993

994 **S10 Table. Distribution of several bZIP DNA motifs among the promoter regions of all *Arabidopsis***  
995 **genes.**

996

997 **S11 Table. List of species used to construct the two trees of figure 8, their codes and the**  
998 **presence/absence of the different PMD-C and PP7 motifs.**

999

1000 **S12 Table. (A) PMD-C and (B) PP7/PP7L motifs used to construct the two phylogenetic trees of**  
1001 **Figure 8.**

1002

1003 **S13 Table. List of primers used in this study.**

1004

1005 **S14 Table. Next Generation Sequencing (NGS) mapping and coverage statistics.**

1006

1007

1008

1009

Fig1

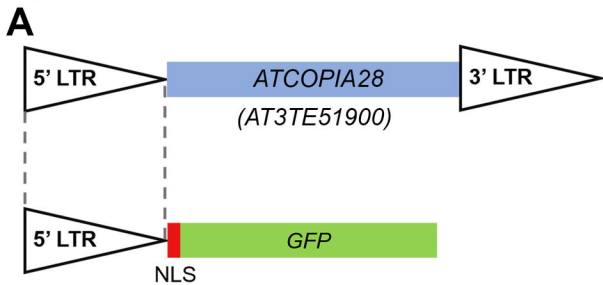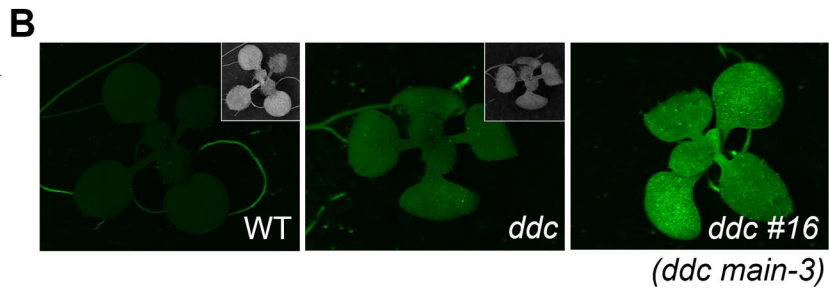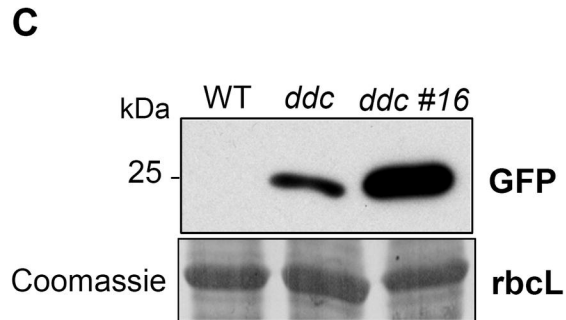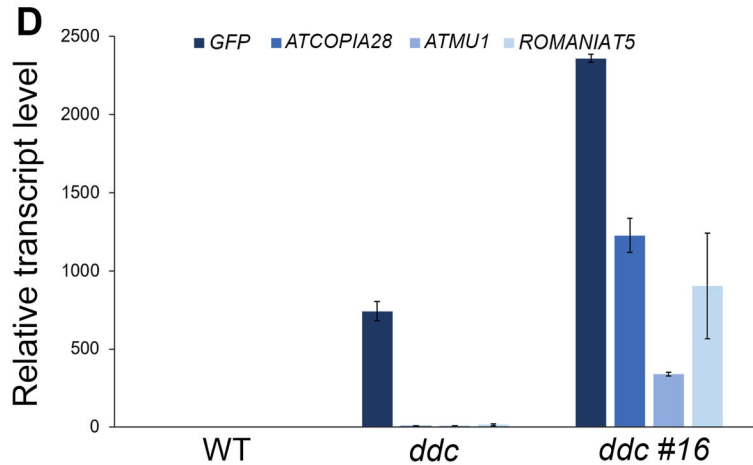

Fig 2

A

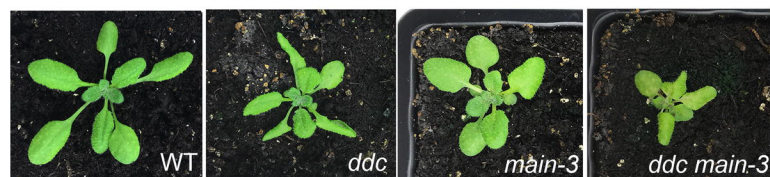

B

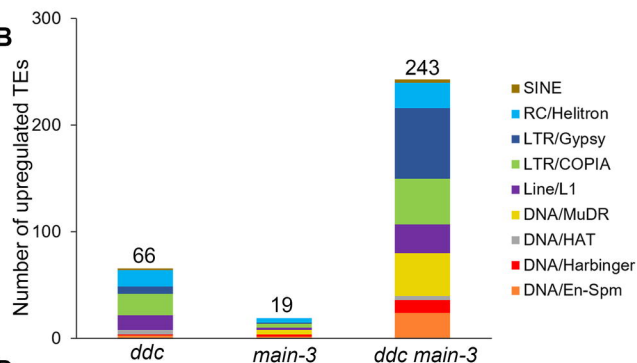

C

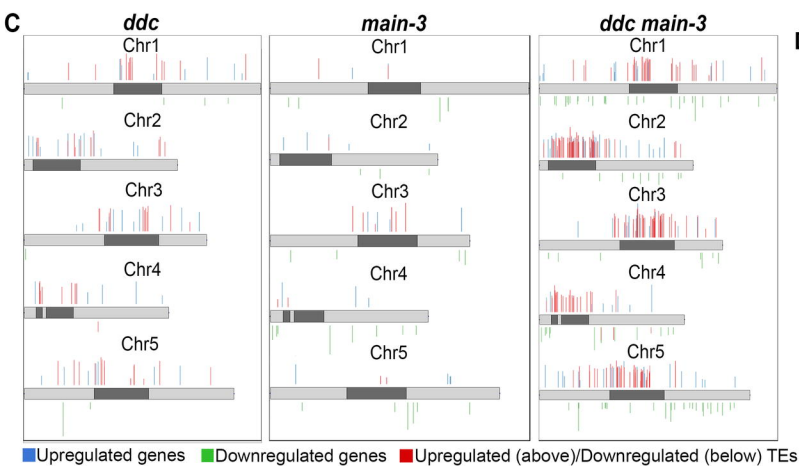

D

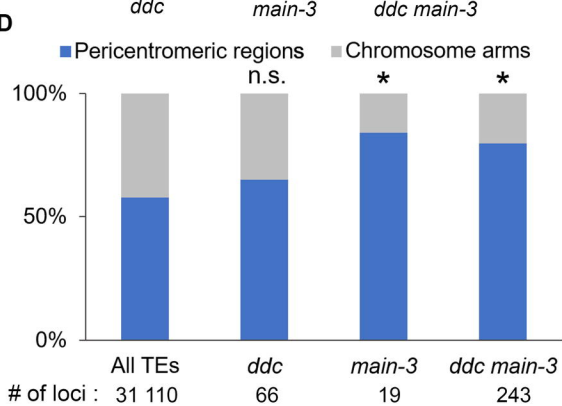

E

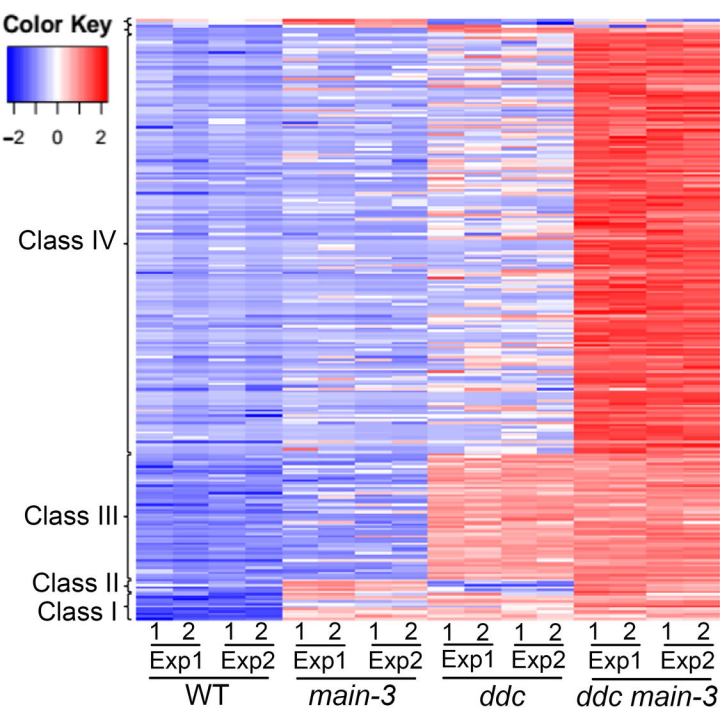

F

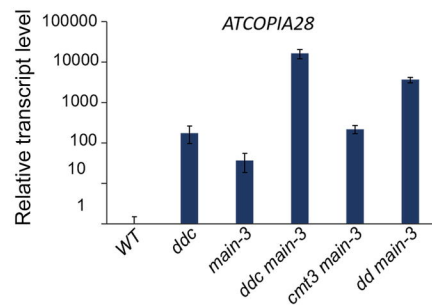

G

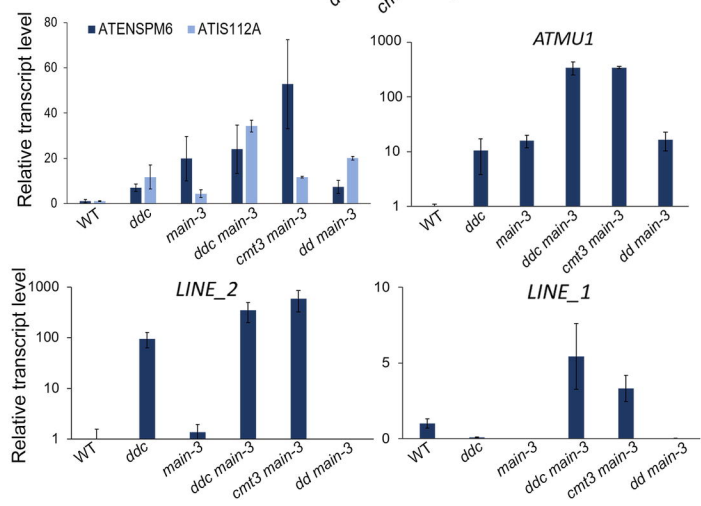



**Fig 3**

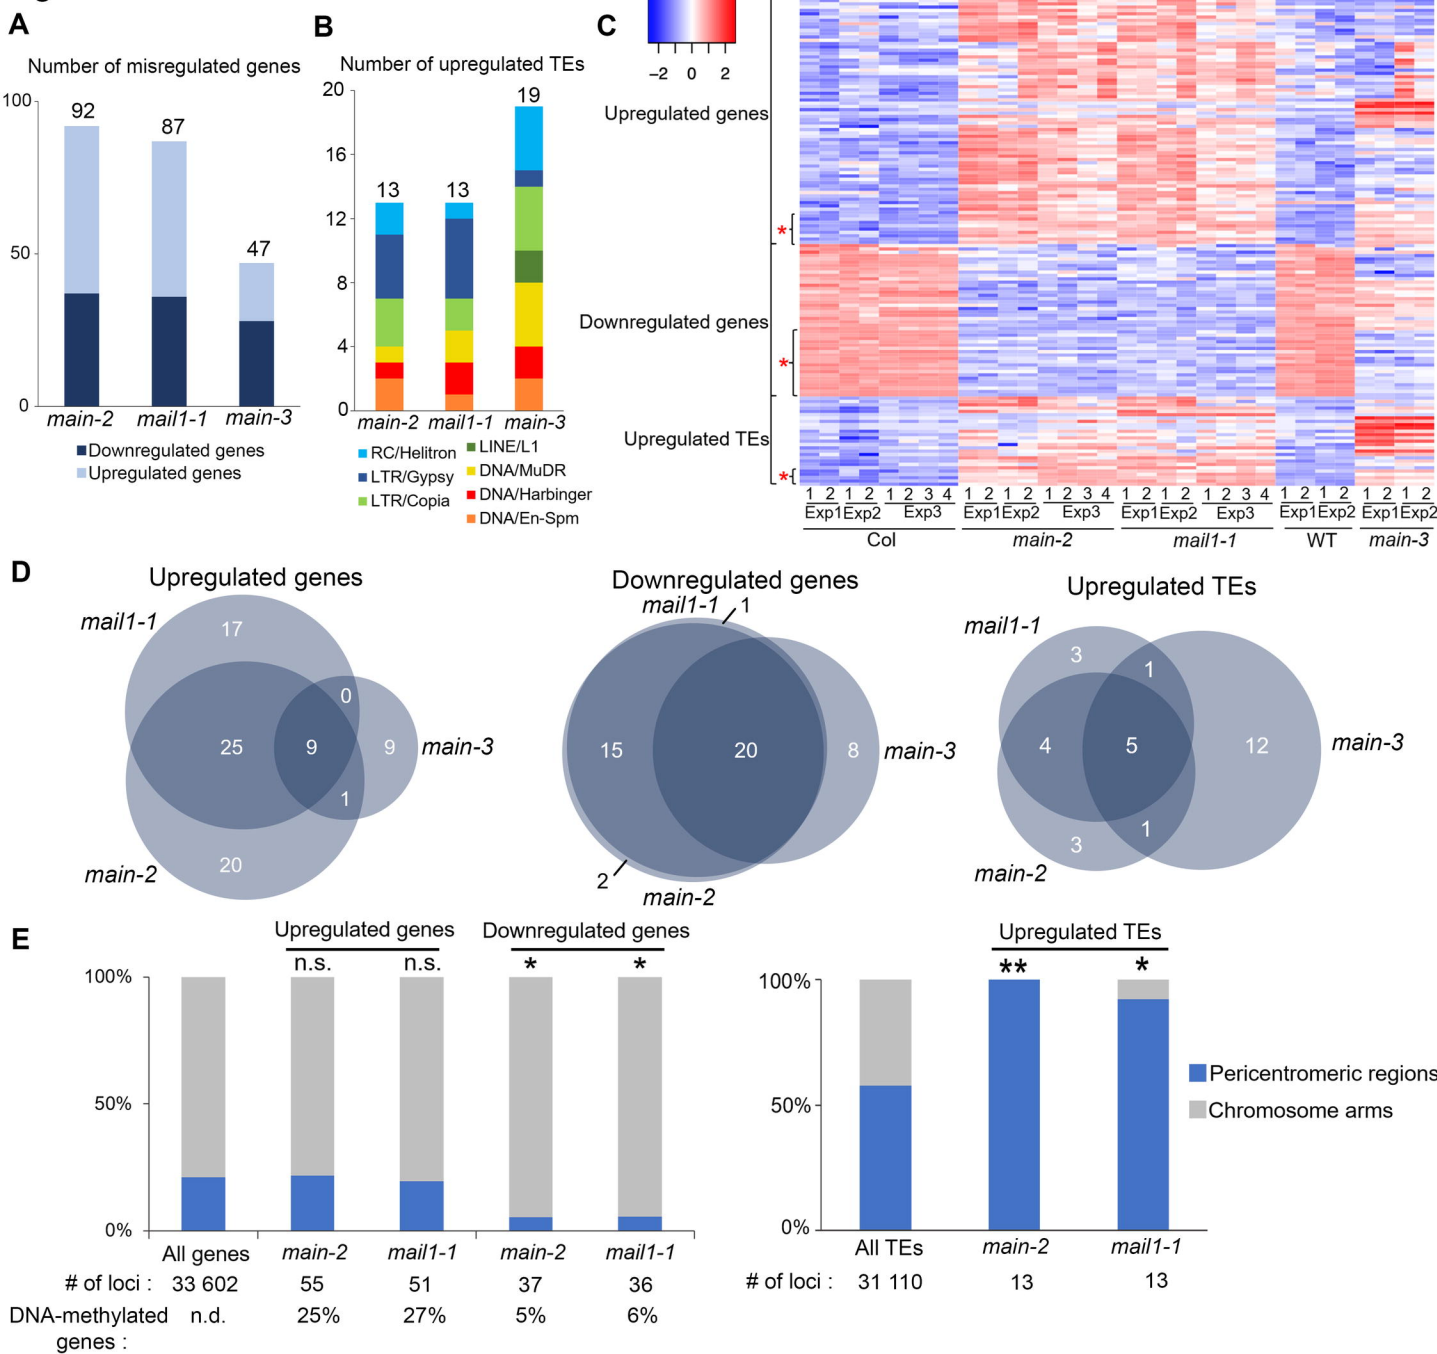

**Fig 4**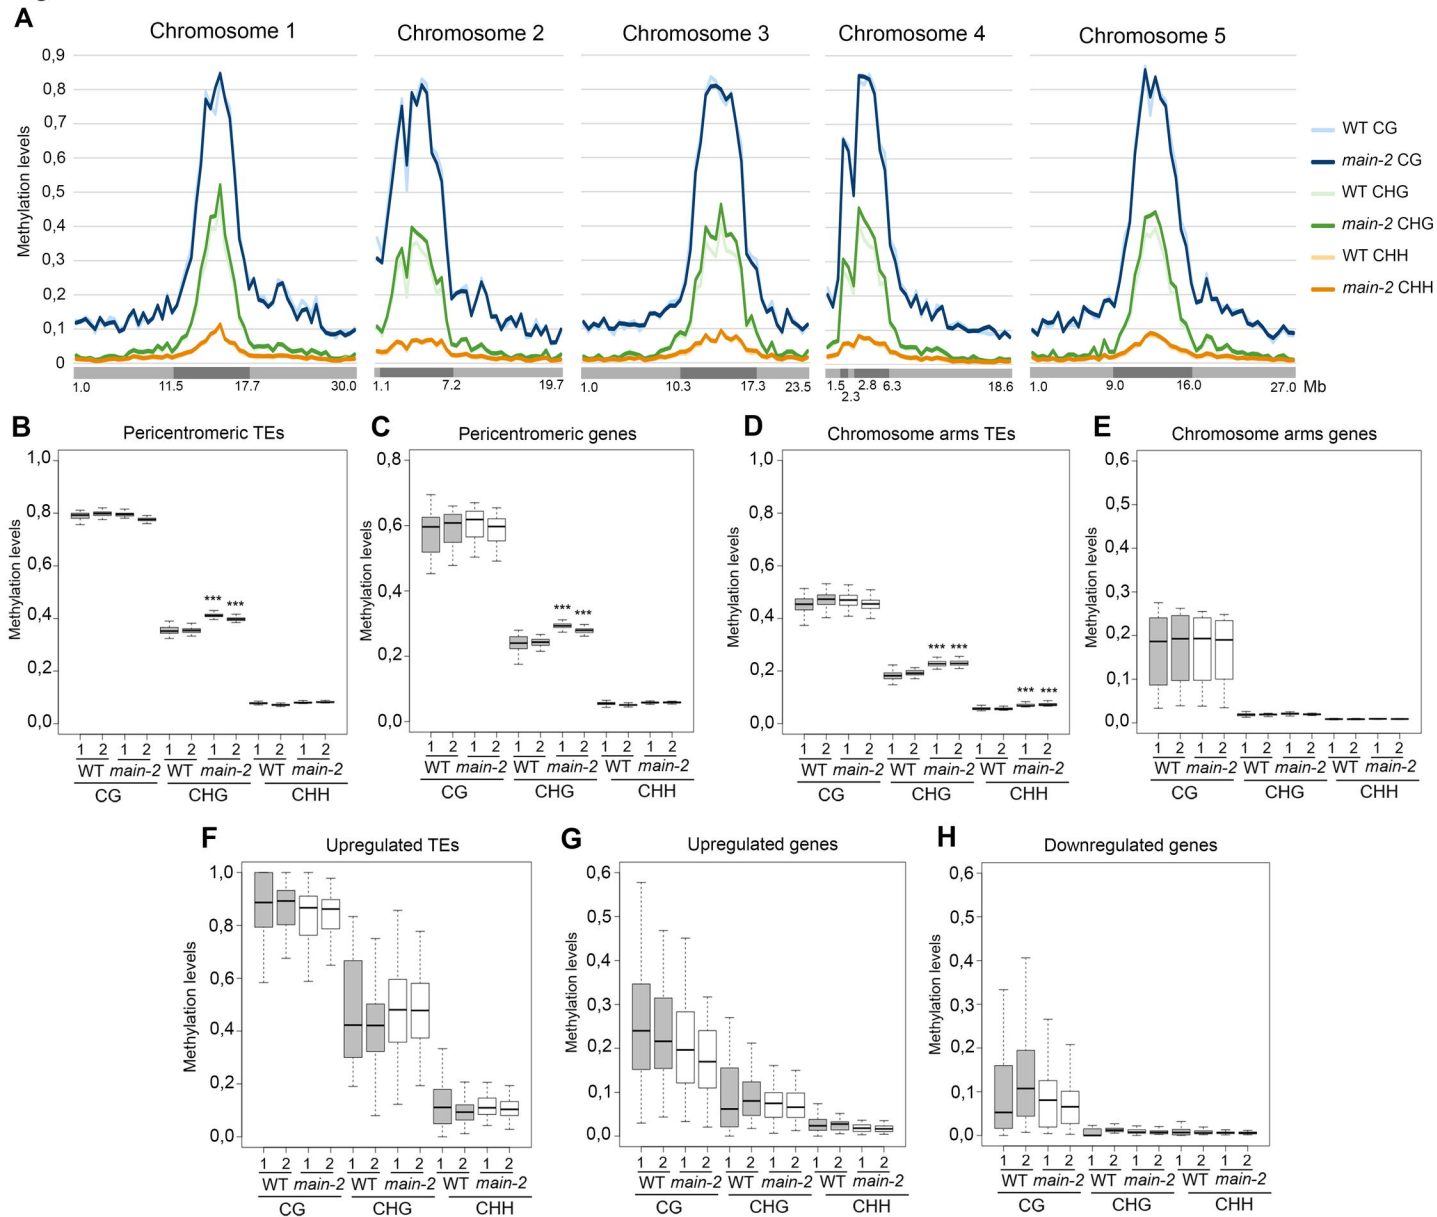

Fig 5

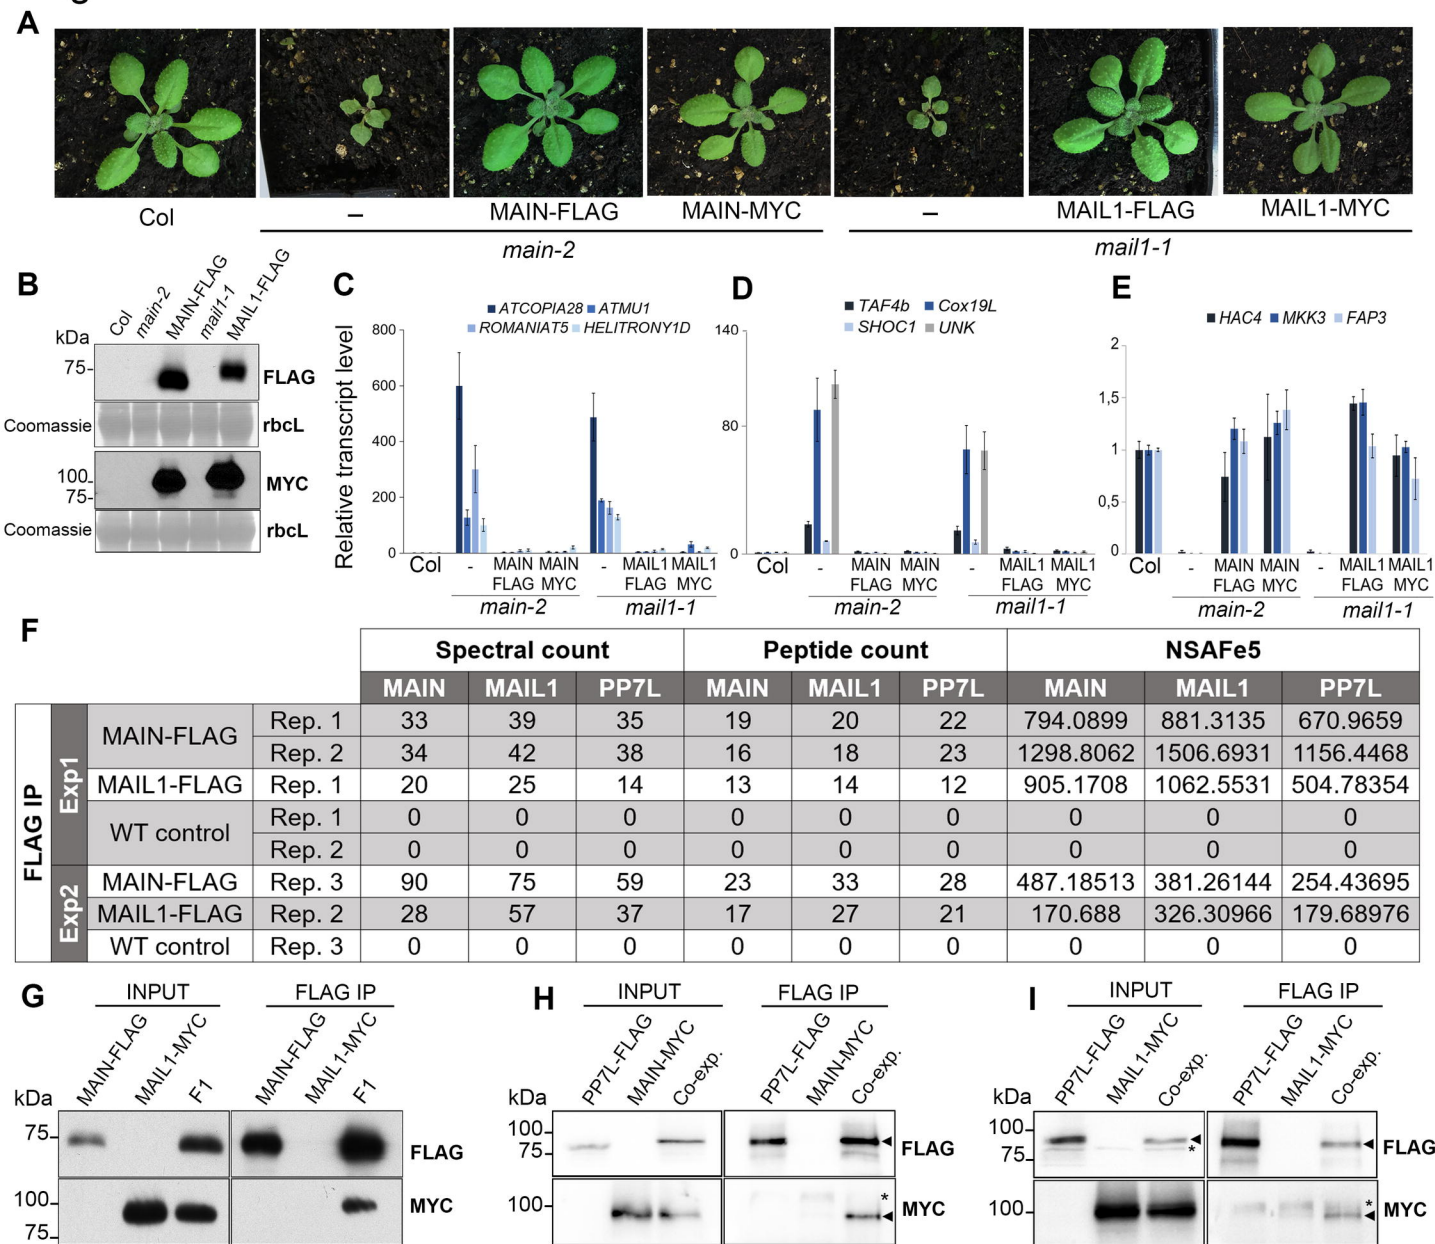

Fig 6

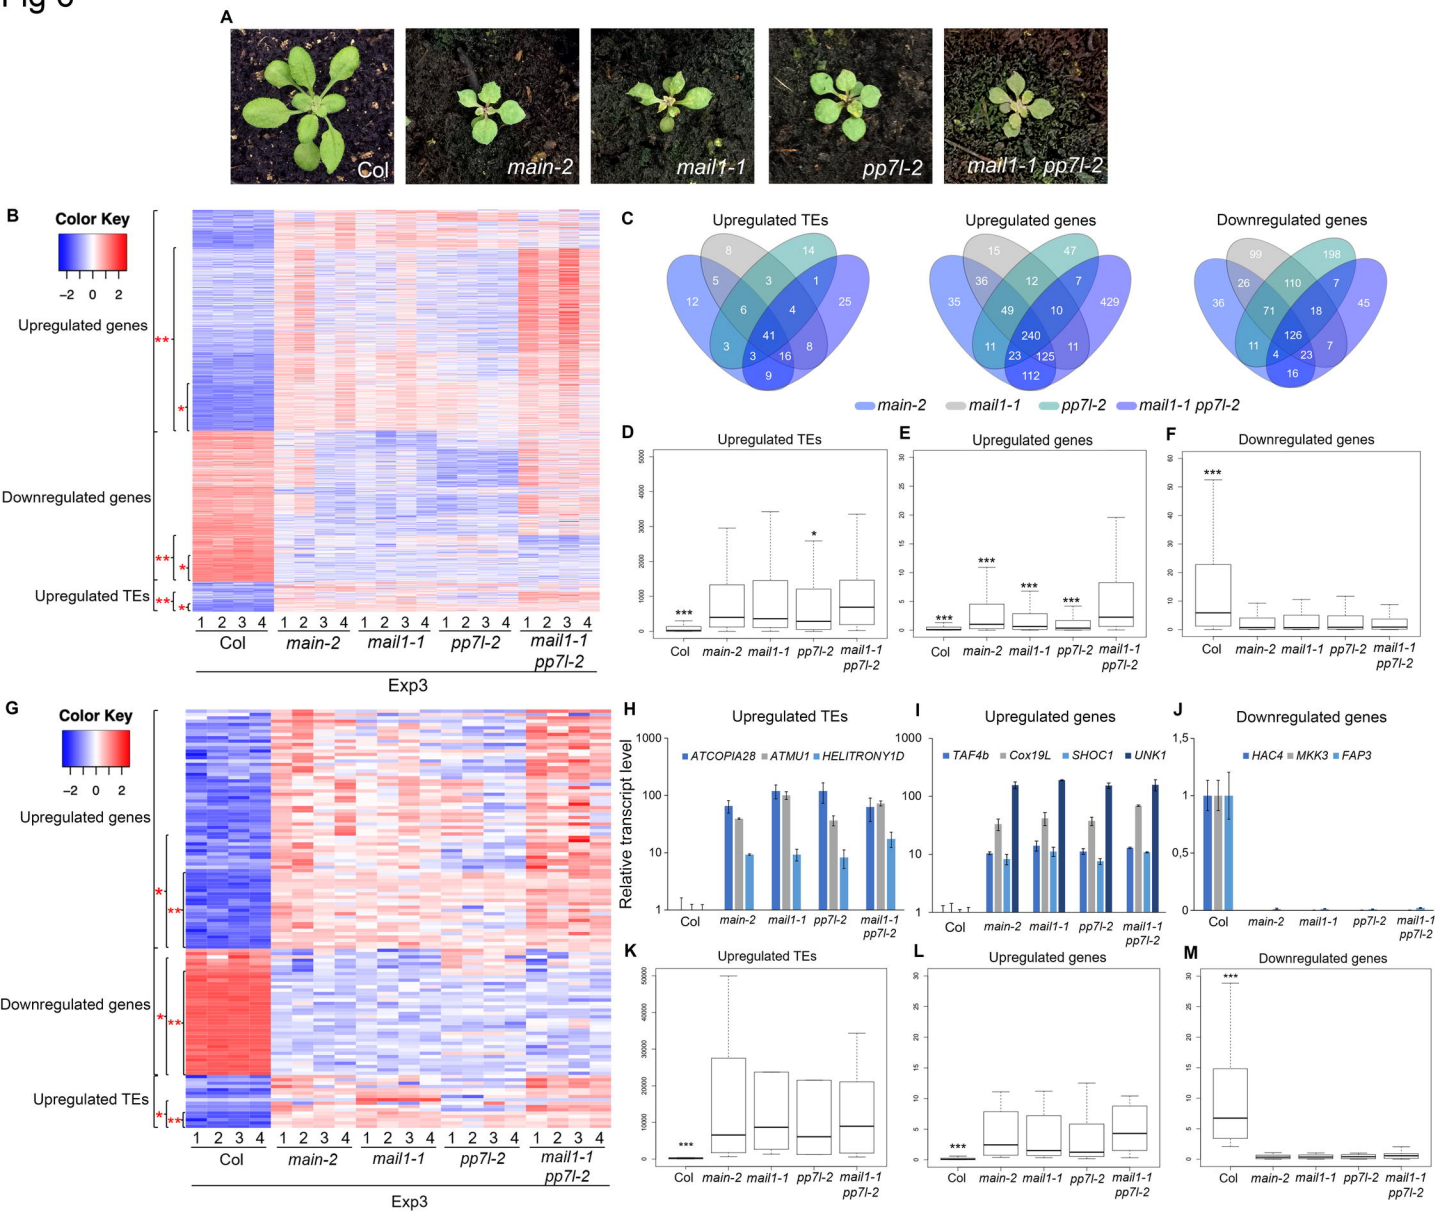

**Fig 7**

- Condensed chromocenters
- Intermediate chromocenters
- Decondensed chromocenters

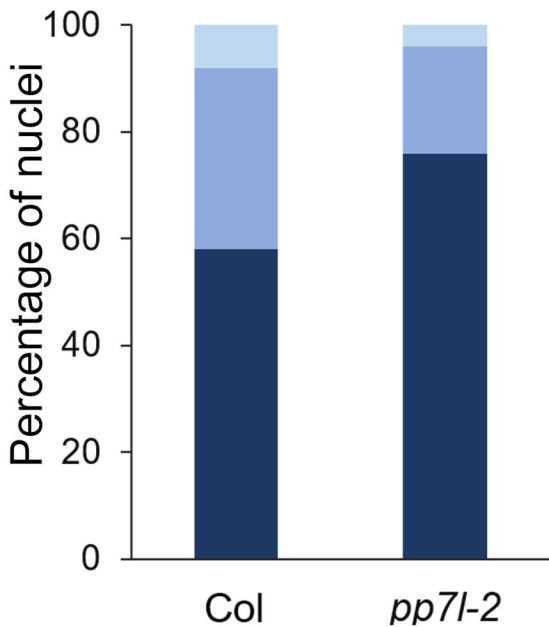

Condensed

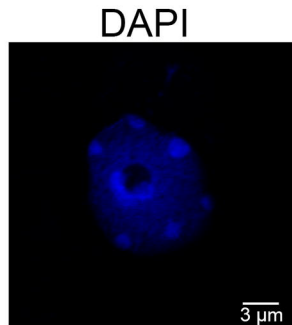

H3K9me2

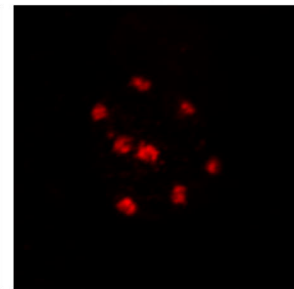

Intermediate

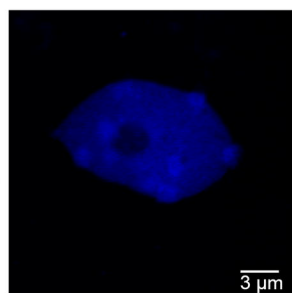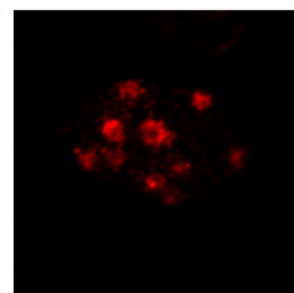

Decondensed

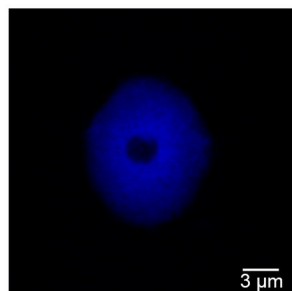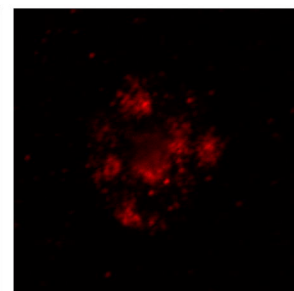

Fig 8

A

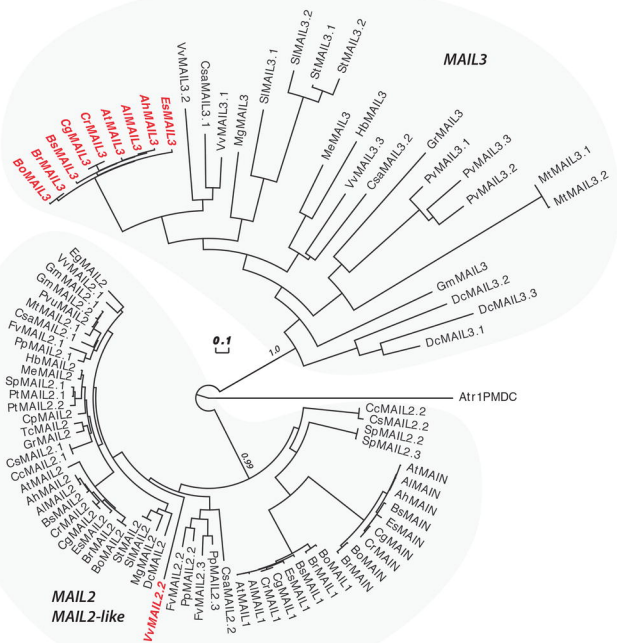

B

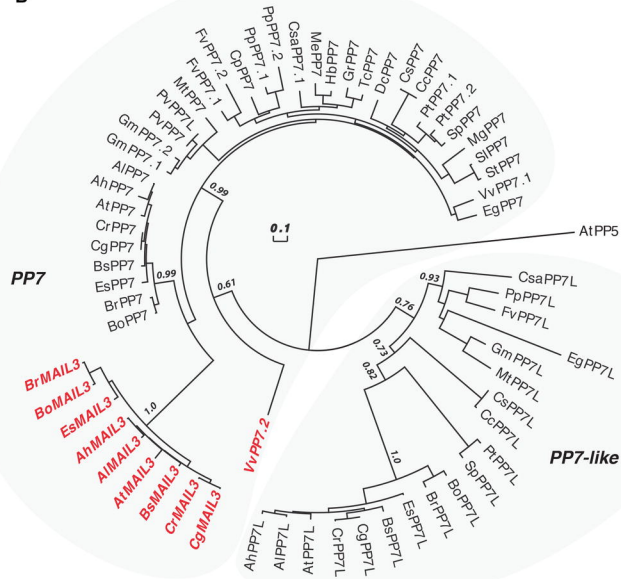

Source: https://www.biorxiv.org/content/10.1101/710905v2.full.pdf
