1 **The plant mobile domain proteins MAIN and MAIL1 interact with the**  
2 **phosphatase PP7L to regulate gene expression and silence transposable**  
3 **elements in *Arabidopsis thaliana*.**

4

5 Short title: The PMD MAIN/MAIL1 and PP7L complex regulates gene expression and TE silencing.

6

7 Melody Nicolau<sup>1,2</sup>, Nathalie Picault<sup>1,2</sup>, Julie Descombin<sup>1,2</sup>, Yasaman Jami-Alahmadi<sup>3</sup>, Suhua Feng<sup>4</sup>,

8 Etienne Bucher<sup>5</sup>, Steven E. Jacobsen<sup>4,6</sup>, Jean-Marc Deragon<sup>1,2</sup>, James Wohlschlegel<sup>3</sup> and Guillaume

9 Moissiard<sup>1,2\*</sup>.

10

11 1 LGDP-UMR5096, CNRS, Perpignan, France.

12 2 LGDP-UMR5096, Université de Perpignan Via Domitia, France.

13 3 Department of Biological Chemistry, University of California at Los Angeles, Los Angeles, CA, USA.

14 4 Department of Molecular, Cell and Developmental Biology, University of California at Los Angeles,

15 Los Angeles, CA, USA.

16 5 Plant Breeding and Genetic Resources, Agroscope, Nyon, Switzerland.

17 6 Howard Hughes Medical Institute, University of California at Los Angeles, Los Angeles, CA, USA.

18

19 \* Corresponding author

20 E-mail: [guillaume.moissiard@univ-perp.fr](mailto:guillaume.moissiard@univ-perp.fr)

21

## 22 **ABSTRACT**

23 Transposable elements (TEs) are DNA repeats that must remain silenced to ensure cell  
24 integrity. Several epigenetic pathways including DNA methylation and histone modifications are  
25 involved in the silencing of TEs, and in the regulation of gene expression. In *Arabidopsis thaliana*, the  
26 TE-derived plant mobile domain (PMD) proteins have been involved in TE silencing, genome stability,  
27 and control of developmental processes. Using a forward genetic screen, we found that the PMD  
28 protein MAINTENANCE OF MERISTEMS (MAIN) acts synergistically and redundantly with DNA  
29 methylation to silence TEs. We found that MAIN and its close homolog MAIN-LIKE 1 (MAIL1) interact  
30 together, as well as with the phosphoprotein phosphatase (PPP) PP7-like (PP7L). Remarkably, *main*,  
31 *mail1*, *pp7l* single and *mail1 pp7l* double mutants display similar developmental phenotypes, and  
32 share common subsets of upregulated TEs and misregulated genes. Finally, phylogenetic analyses of  
33 PMD and PP7-type PPP domains among the Eudicot lineage suggest neo-association processes  
34 between the two protein domains to potentially generate new protein function. We propose that,  
35 through this interaction, the PMD and PPP domains may constitute a functional protein module  
36 required for the proper expression of a common set of genes, and for silencing of TEs.

37

## 38 **AUTHOR SUMMARY**

39 The plant mobile domain (PMD) is a protein domain of unknown function that is widely spread  
40 in the angiosperm plants. Although most PMDs are associated with repeated DNA sequences called  
41 transposable elements (TEs), plants have domesticated the PMD to produce genic versions that play  
42 important roles within the cell. In *Arabidopsis thaliana*, MAINTENANCE OF MERISTEMS (MAIN) and  
43 MAIN-LIKE 1 (MAIL1) are genic PMDs that are involved in genome stability, developmental processes,  
44 and silencing of TEs. The mechanisms involving MAIN and MAIL1 in these cellular processes remain  
45 elusive. Here, we show that MAIN, MAIL1 and the phosphoprotein phosphatase (PPP) named PP7-like  
46 (PP7L) interact to form a protein complex that is required for the proper expression of genes, and the

47 silencing of TEs. Phylogenetic analyses revealed that PMD and PP7-type PPP domains are evolutionary  
48 connected, and several plant species express proteins carrying both PMD and PPP domains. We  
49 propose that interaction of PMD and PPP domains would create a functional protein module involved  
50 in mechanisms regulating gene expression and repressing TEs.

51

## 52 INTRODUCTION

53 In eukaryotes, DNA methylation and post-translational modifications of histones are  
54 epigenetic marks involved in chromatin organization, regulation of gene expression and silencing of  
55 DNA repeats such as transposable elements (TEs) [1-3]. Constitutive heterochromatin is highly  
56 condensed and enriched in silenced TEs that are targeted by DNA methylation and histone H3 lysine  
57 9 dimethylation (H3K9me<sub>2</sub>). Euchromatin is more relaxed and composed of genes that are more  
58 permissive to transcription, depending on the recruitment of transcription factors (TFs), cofactors and  
59 RNA polymerases [1, 4]. In plants, DNA methylation occurs in three different cytosine contexts: CG,  
60 CHG and CHH (where H = A, T or C), involving specialized DNA methyltransferases [5]. In *Arabidopsis*  
61 *thaliana*, DOMAINS REARRANGED METHYLTRANSFERASE 2 (DRM2) and DRM1 mediate de novo DNA  
62 methylation in all sequence contexts through the RNA-directed DNA methylation (RdDM) pathway,  
63 which involves among other components, RNA-DEPENDENT RNA POLYMERASE 2 (RDR2) and DICER-  
64 LIKE 3 (DCL3) for the production of short interfering (si)RNAs [6, 7]. The maintenance of CG  
65 methylation is specifically performed by METHYLTRANSFERASE 1 (MET1), while CHROMOMETHYLASE  
66 2 (CMT2) and CMT3 are involved in the maintenance at CHG sites [8, 9]. CMT2 can also be involved in  
67 the deposition of CHH methylation at specific genomic location [10, 11]. Finally, DRM2 is mostly  
68 required for the maintenance of CHH methylation through the RdDM pathway [6, 7, 9]. Together with  
69 DNA methylation, additional pathways play important roles in TE silencing. The MICRORCHIDIA 1  
70 (MORC1) and MORC6 ATPases interact together, and are required for heterochromatin condensation  
71 and repression of TEs, acting mostly downstream of DNA methylation and RdDM pathway [12-14].

72 More recently, the *A. thaliana* plant mobile domain (PMD) proteins MAINTENANCE OF

73 MERISTEM (MAIN) and MAIN-LIKE 1 (MAIL1) were identified as new factors required for TE silencing  
74 [15]. In addition, these two proteins have been involved in genome stability, and regulation of  
75 developmental processes such as cell division and differentiation [16, 17]. The PMD is a large protein  
76 domain of unknown function that is widely represented among the angiosperms, predominantly  
77 associated with TEs [15, 18]. It has been proposed that genic PMD versions, such as the MAIN and  
78 MAIL1 proteins derived from TEs after gene domestication [15, 18, 19]. Previous studies suggested  
79 that genic PMDs could act as cellular factors related to transcription, possibly acting as transcription  
80 factor (TF)-like, co-factor or repressor proteins regulating this cellular process [16, 18]. Nevertheless,  
81 the role of PMD proteins in the regulation of transcription remains elusive. Most of genic PMD  
82 proteins are standalone versions, however, in some cases, the PMD is fused to another protein  
83 domain, such as protease, kinase or metallo-phosphatase (MPP) domains. For instance in *A. thaliana*,  
84 the MAIL3 protein carries a PMD, which is fused to a putative serine/threonine-specific  
85 phosphoprotein phosphatase (PPP) domain phylogenetically related to the plant-specific protein  
86 phosphatase 7 (PP7) [20]. PP7 is a calmodulin-binding PPP that has been related to cryptochrome  
87 (CRY)-mediated blue-light signaling, and to the control of stomatal aperture [20-22]. PP7 is also  
88 involved in the perception of red/far red light by controlling the phytochrome pathway [23, 24]. In  
89 addition to PP7 and MAIL3 (also known as “long PP7”), the protein PP7-like (PP7L) belongs to the same  
90 phylogenetic clade [20]. PP7L was recently identified as a nuclear protein involved in chloroplast  
91 development and abiotic stress tolerance [25]. The *pp7l* mutant plants showed photosynthetic defects  
92 and strong developmental phenotype associated with misregulation of several genes [25].

93 In this study, we described a forward genetic screen based on a GFP reporter gene that  
94 allowed us to identify a mutant population in which *MAIN* is mutated, leading to GFP overexpression.  
95 We then deciphered the genetic interaction between the DRM2, CMT3 and MAIN, showing that these  
96 proteins are part of different epigenetic pathways that act redundantly or synergistically to repress  
97 TEs. Biochemical analyses indicated that MAIN and MAIL1 physically interact together. These analyses  
98 also identified PP7L as a robust interactor of MAIN and MAIL1 proteins. In addition, the

99 characterization of developmental and molecular phenotypes of *pmd* and *pp7l* single and double  
100 mutant plants strongly suggest that these proteins interact together to silence TEs, and regulate the  
101 expression of a common set of genes. Finally, phylogenetic analyses allowed us to determine the  
102 distribution of PMD and PP7/PP7L domains among the Eudicots. Based on these analyses, we have  
103 evidences of co-evolution linked to the neo-association of the PMD and PP7-type PPP domains on  
104 single proteins in several Eudicot species, suggesting a convergent evolution between these two  
105 protein domains.

106

## 107 **RESULTS**

### 108 **Mutation in *MAIN* is responsible for TE silencing defects.**

109 The *ATCOPIA28* retrotransposon *AT3TE51900* (hereafter called *ATCOPIA28*) is targeted by  
110 several epigenetic pathways such as DNA methylation and the MORC1/6 complex, which altogether  
111 contribute to its repression. We engineered a construct in which the 5' long terminal repeat (LTR)  
112 promoter region of *ATCOPIA28* controls GFP transcription (Fig 1A). While the *ATCOPIA28::GFP*  
113 transgene is fully silenced in wild type (WT) plants, it is weakly expressed in the DNA methylation-  
114 deficient *drm1 drm2 cmt3 (ddc)* triple mutant background (Fig 1B) [26]. We performed an ethyl  
115 methane sulfonate (EMS) mutagenesis using the *ATCOPIA28::GFP ddc* plants as sensitized genetic  
116 material, and screened for mutant populations showing GFP overexpression. Among, the selected  
117 populations, we retrieved two new mutant alleles of *MORC6* carrying missense mutations in either  
118 the GHKL or S5 domains of the protein (S1A-C Fig). We also identified the population *ddc #16* showing  
119 strong overexpression of GFP and misregulation of several endogenous TEs, including *ATCOPIA28* (Fig  
120 1B-D). Mapping experiments based on whole genome resequencing and bulk segregant analysis  
121 indicated that *ddc #16* carries a missense point mutation (C230Y) in the gene *AT1G17930*, previously  
122 named *MAIN* (S1D and S1E Fig). Genetic complementation analyses by crossing the *ddc #16* EMS  
123 mutant with the knock-out (KO) transferred DNA (T-DNA) insertion line *main-2* generated F1 *ddc #16*

124 x *main-2* plants that did not express the GFP (S1F Fig). Transcriptional profiling analyses showed,  
125 however, that endogenous TEs, including *ATCOPIA28*, were upregulated in F1 *ddc #16* x *main-2* plants,  
126 but not in F1 control plants generated from the backcross of *ddc #16* with WT Columbia (Col) plants  
127 (S1G Fig). Self-fertilization of F1 *ddc #16* x *main-2* plants allowed us to retrieve several F2 *ddc #16* x  
128 *main-2* plants overexpressing the GFP (S1F Fig). Among these GFP positive F2 plants, we identified  
129 individuals that were either homozygote for the EMS mutation in the *MAIN* gene, or plants carrying  
130 both the EMS and T-DNA *main-2* mutant alleles (S1F Fig). Moreover, while all these plants were  
131 homozygote for the *drm2* mutation, half of them segregated the *cmt3* mutation. Thus, altogether,  
132 these analyses suggested that *ATCOPIA28::GFP* silencing is more DRM2- than CMT3-dependent. More  
133 importantly, they confirmed that *MAIN* was the mutated gene causing the upregulation of  
134 *ATCOPIA28::GFP* and several endogenous TEs. Therefore, *ddc #16* was renamed *ddc main-3*.

135

### 136 **The MAIN, DRM2 and CMT3 pathways act synergistically to repress TEs and DNA-methylated genes.**

137 To determine the genetic interaction of *ddc* and *main-3* mutations on TE silencing, we carried  
138 out two independent RNA sequencing (RNA-seq) experiments in the hypomorphic *main-3* single, *ddc*  
139 triple and *ddc main-3* quadruple mutant plants (Fig 2A and S2A Fig). As previously described, the *ddc*  
140 mutant showed upregulation of several TEs spread over the five chromosomes (Fig 2B-D and S2B Fig,  
141 and S1 Table) [11]. Loss of TE silencing was also observed to a milder degree in the *main-3* mutant,  
142 with the significant enrichment of pericentromeric TEs among the upregulates TEs (Fig 2B-D and S2B  
143 Fig, and S1 Table). The *ddc main-3* mutant showed an exacerbation of TE silencing defects, with a large  
144 number of pericentromeric TEs being specifically upregulated in this mutant background (Fig 2B-D and  
145 S2B Fig, and S1 Table). Comparative analyses revealed that upregulated TEs cluster into four distinct  
146 classes (Fig 2E and S2C Fig). Class I TEs are upregulated in *ddc*, *main-3* and *ddc main-3* mutants (Fig 2E  
147 and S2C-D Fig). Class II and class III TEs are targeted by the MAIN and DRM2/CMT3 pathways,  
148 respectively (Fig 2E and S2C-D Fig). However, the upregulation of class II and class III TEs is further  
149 enhanced in *ddc main-3*, which suggests that the MAIN and DRM2/CMT3 pathways can partially

150 compensate each other at these genomic locations (S2D Fig). Finally, the most abundant class IV TEs  
151 are only misregulated in *ddc main-3*, which implies that the MAIN and DRM2/CMT3 pathways act  
152 redundantly to silence these TEs (Fig 2E and S2C-D Fig).

153 Several genes were also misregulated in the three mutant backgrounds (S1 Table). Among  
154 these genes, a subset was commonly upregulated in *ddc*, *main-3* and *ddc main-3* (S2E Fig).  
155 Remarkably, genes that were upregulated in *ddc*, *main-3* or *ddc main-3* were significantly enriched in  
156 pericentromeric regions of chromosomes, where constitutive heterochromatin resides (S2F Fig). This  
157 is consistent with the fact that, among these upregulated genes, we identified a large proportion of  
158 genes that were DNA-methylated (in the three cytosine contexts) and targeted by H3K9me2 (S2F Fig).  
159 Conversely, we could only identify one gene commonly downregulated in *ddc*, *main-3* and *ddc main-*  
160 *3* (S2F Fig). Furthermore, downregulated genes in *ddc*, *main-3* or *ddc main-3* were rather enriched in  
161 chromosome arms, and most of them were not DNA-methylated genes (S2F Fig).

162 To further dissect the genetic interaction between the DRM2, CMT3 and MAIN pathways, we  
163 generated the *drm1 drm2 main-3* (*dd main-3*) and *cmt3 main-3* mutants (S2G Fig). We then analyzed  
164 the expression level of several TEs previously identified as misregulated in *ddc*, *main-3* and/or *ddc*  
165 *main-3*. The endogenous *ATCOPIA28* was the most expressed in *ddc main-3* and *dd main-3*, and to a  
166 lesser extent, in *cmt3 main-3* (Fig 2F). This is consistent with the fact that all the F2 *ddc #16* x *main-2*  
167 plants overexpressing *ATCOPIA28::GFP* were *drm2* homozygote, although they segregated the *cmt3*  
168 mutation (S1F Fig). Further analyses showed that most of the tested TEs tend to be more expressed  
169 in *cmt3 main-3* than in *dd main-3*, with the exception of *ATIS112A* that was more upregulated in *dd*  
170 *main-3* than in *cmt3 main-3* (Fig 2G). In conclusion, these analyses showed complex genetic  
171 interactions between the DRM2, CMT3 and MAIN pathways, suggesting that MAIN and DNA  
172 methylation pathways act synergistically to repress TEs and DNA-methylated genes.

173

#### 174 **MAIN and MAIL1 are required for the proper expression of a common set of genes and TEs.**

175 Beside a role of MAIN in TE and gene silencing, our transcriptomic analyses using the

176 hypomorphic *main-3* mutant suggested that MAIN would be required for the expression of several  
177 genes that are not controlled by the DRM2 and CMT3 pathway (S2E Fig). To further study the role of  
178 MAIN and MAIL1 in the regulation of gene expression and TE silencing, we performed two  
179 independent RNA-seq experiments in the *main-2* and *mail1-1* null mutants (RNA-seq Exp1 and Exp3),  
180 and combined these experiments with the reanalysis of previously published RNA-seq datasets (RNA-  
181 seq Exp2) [15]. Principal component analyses (PCA) showed that for each RNA-seq experiment, *main-2*  
182 and *mail1-1* mutant samples tend to cluster together, and away from the WT samples (S3A Fig).  
183 Analyzing these three RNA-seq experiments together allowed to identify large numbers of genes and  
184 TEs that were misregulated in the *main-2* and *mail1-1* null mutants (Fig3A and B, and S2 Table).

185 We then compared the transcriptomes of *main-2* and *mail1-1* mutants, together with the  
186 *main-3* mutant allele (Fig3A and B, S1 and S2 Tables). As expected by the fact that *main-2* and *mail1-1*  
187 are null mutants while *main-3* is a hypomorphic mutant allele, we identified greater numbers of  
188 misregulated loci in *main-2* and *mail1-1* in comparison to *main-3* (Fig3A and B). Fractions of these loci  
189 were specifically misregulated in each mutant background (Fig 3C and D). In addition, we identified  
190 subsets of genes and TEs that were only misregulated in *main-2* and *mail1-1* null mutants, but not in  
191 the hypomorphic *main-3* mutant (Fig 3C and D, and S3 Table). Finally, these analyses revealed subsets  
192 of loci that were commonly misregulated in the three mutant backgrounds (Fig 3C and D, S3B-D Fig  
193 and S3 Table).

194 The biggest overlaps between misregulated loci in *main-2*, *mail1-1* and *main-3* mutants were  
195 among the downregulated genes and upregulated TEs, whereas only a small proportion of genes  
196 commonly upregulated in *main-2* and *mail1-1* were also upregulated in *main-3* (Fig 3D). As observed  
197 in *main-3* (S2F Fig), upregulated TEs in *main-2* and *mail1-1* were enriched in pericentromeric regions,  
198 and genes that were downregulated in *main-2* and *mail1-1* were not targeted by DNA methylation,  
199 and mostly located in the chromosome arms (Fig 3E). However, unlike in *main-3*, the upregulated  
200 genes in *main-2* and *mail1-1* were not enriched in pericentromeric regions, and only small fractions of  
201 them were DNA-methylated genes (Fig 3E). This discrepancy can be explained by the fact that *main-2*



202 and *mail1-1* null mutations have a much greater impact on the misregulation of gene expression than  
203 the hypomorphic *main-3* mutant allele.

204 Finally, we compared the sets of misregulated loci in *main-2*, *mail1-1*, *ddc* and *ddc main-3* (S1  
205 and S2 Tables). We found significant overlaps among upregulated genes and TEs between *main-2*,  
206 *mail1-1*, *ddc* and *ddc main-3* (S3E Fig). This suggests that MAIN, MAIL1, DRM2 and CMT3 cooperate  
207 to silence these subsets of genes and TEs. However, we could not find significant overlaps among  
208 downregulated genes between *main-2*, *mail1-1* and *ddc* (S3E Fig). Instead, a significant overlap was  
209 identified only by comparing the lists of downregulated genes in *main-2*, *mail1-1* and *ddc main-3*,  
210 three genetic backgrounds carrying a mutation in either *MAIN* or *MAIL1* (S3E Fig). Thus, this suggests  
211 that MAIN and MAIL1 are required for the expression of specific genes, in a DRM2- and CMT3-  
212 independent manner.

213 In conclusion, these comparative analyses allowed to precisely define the loci that were  
214 misregulated in *main-2* and *mail1-1* in comparison to *main-3*, *ddc* and *ddcmain-3* mutants. Among  
215 these loci, several TEs and DNA-methylated genes are commonly targeted by the MAIN, MAIL1, DRM2  
216 and CMT3 pathways, which suggests that MAIN, MAIL1 and DNA methylation pathways cooperate to  
217 silence these TEs and DNA-methylated genes. Besides, several genes are downregulated in *main-2* and  
218 *mail1-1*, and subsets of these genes are also downregulated in *main-3*, and *ddcmain-3* but not in *ddc*.  
219 This suggests that the MAIN and MAIL1 act independently of DRM2 and CMT3 to ensure the  
220 expression of these genes. Finally, these results revealed important overlaps between the  
221 misregulated loci in *main-2* and *mail1-1* null mutants, which strongly suggests that the two proteins  
222 act in the same pathway to regulate the expression of common sets of loci.

223

224 **Slight increase in non-CG methylation in the *main-2* mutant does not correlate with changes in gene**  
225 **expression and TE silencing defect.**

226 Whole genome bisulfite sequencing (BS-seq) analyses showed that, at the chromosome scale,  
227 DNA methylation level is mostly unchanged in *main-2* in comparison to WT, with the exception of a

228 slight increase in CHG methylation in pericentromeric regions (Fig 4A). Subtle but statistically  
229 significant CHG hypermethylation was further confirmed in pericentromeric TEs and genes, which are  
230 mostly TE genes (Fig 4B and C). Slight CHG and CHH hypermethylation was also detected in TEs located  
231 in chromosome arms (Fig 4D). Conversely, genes located in chromosome arms did not show significant  
232 changes in DNA methylation level in *main-2* (Fig 4E). Identical results were obtained by analyzing the  
233 DNA methylation level at upregulated TEs and misregulated genes in *main-2* (Fig 4F-H). We then  
234 analyzed the DNA methylation level at genomic locations previously defined as differentially  
235 hypomethylated regions (hypo DMRs) at CHG and CHH sites in *cmt3* and *drm1drm2 (dd)* mutants,  
236 respectively [26]. The *cmt3* and *dd* hypo DMRs are mostly located in TEs. As observed with  
237 pericentromeric genes and all TEs (Fig 4B-D), we found slight increases in CHG and CHH methylation  
238 at *cmt3* and *dd* hypo DMRs, respectively, in *main-2* (S4A and S4B Fig). Finally, DMR calling in *main-2*  
239 using stringent parameters only identified a few DMRs (S4C Fig). Thus, DNA methylation is mostly  
240 unaffected in *main-2*, with the exception of a slight increase in non-CG methylation at pericentromeric  
241 genes and all TEs. Moreover, this subtle non-CG hypermethylation does not correlated with changes  
242 in gene and TE expression observed in *main-2* because DNA methylation level in *main-2* is unchanged  
243 at these misregulated loci (Fig 4F-H).

244

#### 245 **MAIN, MAIL1 and the metallo-phosphatase PP7L physically interact together.**

246 The *main-2* and *mail1-1* null mutants display similar molecular and developmental  
247 phenotypes (Fig 3 and Fig 5A). Thus, we hypothesized that MAIN and MAIL1 proteins may act in the  
248 same pathway, possibly by interacting together. To test this hypothesis, we generated transgenic lines  
249 expressing FLAG- and MYC-tagged genomic PMD versions driven by their endogenous promoters. We  
250 confirmed that epitope-tagged MAIN and MAIL1 proteins were produced at the expected sizes, and  
251 they could complement the respective developmental phenotypes of null mutant plants (Fig 5A and  
252 B). Importantly, they could also efficiently rescue the TE silencing and gene expression defects  
253 observed in *main-2* and *mail1-1* mutants, implying that epitope-tagged MAIN and MAIL1 are

254 functional proteins (Fig 5C-E). Using FLAG-tagged MAIN and MAIL1 expressing plants,  
255 immunoprecipitation followed by mass spectrometry (IP-MS) analyses were carried out to determine  
256 potential protein interactors. Mass spectrometry (MS) analyses indicated that MAIL1 was strongly  
257 immunoprecipitated with MAIN-FLAG and *vice versa* (Fig 5F). To validate IP-MS results, we crossed  
258 the MAIN-FLAG and MAIL1-MYC lines together. We then performed co-immunoprecipitation (co-IP)  
259 experiments using F1 hybrid plants co-expressing the two transgenes, and confirmed that MAIN and  
260 MAIL1 interact together (Fig 5G). MS analyses of MAIN-FLAG and MAIL1-FLAG IP also identified the  
261 metallo-phosphatase PP7L as putative interactor (Fig 5F). MAIN, MAIL1 and PP7L were the only three  
262 proteins reproducibly enriched across multiple replicates (Fig 5F). Co-IP experiments using plants co-  
263 expressing either PP7L-FLAG together with MAIN-MYC or MAIL1-MYC constructs confirmed the  
264 interaction between PP7L and each PMD protein (Fig 5H and I). Thus, the three proteins MAIN, MAIL1  
265 and PP7L physically interact together.

266

267 **The *main*, *mail1* and *pp7l* mutants display similar developmental and molecular phenotypes.**

268 PP7L is a putative metallo-phosphatase that was recently identified as a nuclear protein  
269 required for photosynthesis [20, 25]. The *pp7l-2* null mutant displays abnormal developmental  
270 phenotype reminiscent of *main-2* and *mail1-1* mutant plants, and 3-week-old *mail1-1 pp7l-2* double  
271 mutant plants do not show exacerbation of this phenotype (Fig 6A). To determine the genetic  
272 interaction between PMD and PP7L, we compared the transcriptomes of *main-2*, *mail1-1*, *pp7l-2*  
273 single and *mail1-1 pp7l-2* double mutants (S5A Fig, and S2 and S4 Tables). We identified large numbers  
274 of misregulated loci in *pp7l-2* and *mail1-1 pp7l-2* (S5B-C Fig). As observed in *main-2* and *mail1-1*, TEs  
275 upregulated in *pp7l-2* and *mail1-1 pp7l-2* were enriched in pericentromeric regions, while up- and  
276 downregulated genes were mostly located in the chromosome arms, and not targeted by DNA-  
277 methylation (S5D Fig).

278 Comparative analyses revealed that significant proportions of loci were commonly  
279 misregulated in *main-2*, *mail1-1*, *pp7l-2* and *mail1-1 pp7l-2* mutants, which is consistent with the fact

280 that MAIN, MAIL1 and PP7L interact together to possibly regulate gene expression and silence TEs (Fig  
281 6B-D and S5 Table). These analyses also identified loci that were specifically misregulated in *main-2*,  
282 *mail1-1* or *pp7l-2*, which suggests that each protein is independently required for the proper  
283 expression of subsets of loci (Fig 6B-C). Besides, these analyses revealed loci that were exclusively  
284 misregulated in the *mail1-1 pp7l-2* double mutant, which implies that PP7L and MAIL1 may act  
285 redundantly to ensure the proper expression of these loci (Fig 6B-C). Further analyses showed that,  
286 among the loci that were misregulated in *mail1-1 pp7l-2*, upregulated genes were significantly more  
287 expressed in the double mutant than in each single mutant, and upregulated TEs were significantly  
288 differentially expressed only between *mail1-1 pp7l-2* and *pp7l-2* mutants (Fig 6E-F). Conversely, there  
289 was no significant difference of expression between the double mutant and single mutants for the  
290 downregulated genes (Fig 6G). Thus, these analyses suggest that combining the *pp7l-2* and *mail1-1*  
291 mutations may lead to synergistic defects mostly at genes that are upregulated in the double mutant.

292 We then performed in silico analyses to identify enriched DNA motif within a 1kb promoter  
293 region upstream of start codon of genes that were up- or downregulated in the different mutant  
294 backgrounds. We could not detect any enrichment of a DNA motif among any lists of upregulated  
295 genes (including overlapping lists). Likewise, we could not identify a DNA motif enriched in the lists of  
296 downregulated genes in *pp7l-2* or *ddc*. However, we identified a discrete DNA motif (hereafter called  
297 'DOWN' motif) that was partially enriched in the promoter of genes that were downregulated in *main-*  
298 *2*, *mail1-1* and *mail1-1 pp7l-2* mutants (S5E Fig). The *main-2*, *mail1-1*, *pp7l-2* and *mail1-1 pp7l-2* null  
299 mutants display strong developmental phenotype, and large numbers of misregulated loci (Fig 6A).  
300 Therefore, it is likely that some of the gene misregulation observed in these mutants might be due to  
301 side effects of the mutations. To overcome this issue and refine our analysis, we investigated the  
302 proportion of the 'DOWN' motif among downregulated genes in the hypomorphic *main-3* and *ddc*  
303 *main-3* mutants, as well as in the different overlapping lists of genes commonly downregulated (S3  
304 and S5 Tables). The 'DOWN' motif was strongly enriched among the downregulated genes in *main-3*,  
305 and to a lesser extent in *ddc main-3* (S5E Fig). It was also significantly enriched in the overlapping lists

306 of commonly downregulated genes in *main-2*, *mail1-1* and *main-3* as well as in the *main-2*, *mail1-1*,  
307 *pp7l-2* and *mail1-1 pp7l-2* overlap (S5E Fig and S7 Table). It was further enriched in the promoters of  
308 genes commonly downregulated in all the mutant backgrounds - except *ddc* - analyzed in this study:  
309 twenty-five out of twenty-six genes, 96% of enrichment (S5E Fig, S6 and S7 Tables). We analyzed the  
310 DNA methylation level of the 'DOWN' motif in the promoters of these twenty-five genes in WT and  
311 *main-2*, and found that this DNA motif was not targeted by DNA methylation. Besides, further analyses  
312 showed that only a small fraction of all *Arabidopsis* genes carried the 'DOWN' motif in their promoter  
313 (12,46%, S5E Fig). Finally, random test analyses based on twenty-six randomly picked genes strongly  
314 suggested that the enrichment of the 'DOWN' motif in the promoter of downregulated genes was  
315 substantial (S7 Table).

316 Thus, altogether, these analyses showed that MAIN, MAIL1 and PP7L are equally required for  
317 the repression of several genes and TEs. The three proteins are also required for the proper expression  
318 of a common set of genes that are downregulated in each single mutant as well as in *mail1-1 pp7l-2*  
319 double mutant, and significant fractions of these downregulated genes carry the 'DOWN' DNA motif  
320 in their promoter. Furthermore, the 'DOWN' DNA motif is strongly enriched among the genes that are  
321 always identified as downregulated in every mutant background carrying the *main-2*, *mail1-1*, *pp7l-2*  
322 or *main-3* mutant alleles. This suggests that transcriptional activation of this subset of loci equally  
323 requires MAIN, MAIL1 and PP7L activity, and possibly the recognition of the 'DOWN' DNA motif.

324

### 325 **PP7L is not required for heterochromatin condensation.**

326 WT *Arabidopsis* nuclei at interphase exhibit condensed DNA foci called chromocenters that  
327 are composed of constitutive heterochromatin, and are enriched in H3K9me2 [27]. In several  
328 epigenetic mutants, decondensation of constitutive heterochromatin correlates with disruption of  
329 chromocenters, and loss or diffusion of H3K9me2 in the nucleoplasm [27]. Thus, analyzing H3K9me2  
330 subnuclear distribution by immunofluorescence (IF) experiments has been reproducibly used as a  
331 cytological approach to assay for heterochromatin decondensation [12, 27, 28]. A previous study

332 showed that subnuclear distributions of chromocenters and H3K9me2 were unchanged in *main-2* and  
333 *mail1-1* mutants [15]. However, fluorescent in situ hybridization (FISH) experiments using a DNA  
334 probe for the 106B pericentromeric repeats suggested that heterochromatin was decondensed in the  
335 *main-2* and *mail1-1* in comparison to WT plants [15]. We performed IF experiments to analyze the  
336 subnuclear distribution of H3K9me2 in the *pp7l-2* mutant. These analyses did not show any change in  
337 the condensation level of chromocenters in *pp7l-2* nuclei in comparison to WT (Fig 7). Instead, we  
338 observed that *pp7l-2* nuclei were proportionally more condensed than WT nuclei (Fig 7). This is likely  
339 due to the fact that *pp7l-2* mutant displays abnormal phenotype and growth delay in comparison to  
340 WT plants that are entering the floral transition stage, a developmental stage where partial  
341 chromocenter decondensation has been documented [29]. In conclusion, based on the H3K9me2 IF  
342 experiments, we can conclude that *pp7l-2* is not impaired in chromocenter condensation.

343

#### 344 **The PMD and PP7 domains have co-evolved among the Eudicots.**

345         Among the Angiosperms, most of the genic PMDs, like MAIN and MAIL1, are standalone  
346 versions [18]. However, some genic PMDs can associate with other protein domains, such as for  
347 instance a PPP domain. In *A. thaliana*, the protein MAIL3, which carries a PMD fused to a PPP domain,  
348 is a close homolog of both MAIN/MAIL1 and PP7/PP7L through its PMD and PPP domains, respectively.  
349 Considering that the PMD proteins MAIN and MAIL1 interact with PP7L, and are required for the  
350 expression of similar set of loci, we decided to determine the distribution of related genic PMD and  
351 PPP domains, and to retrace their evolutionary history among plant species. The *A. thaliana* MAIN,  
352 MAIL1 and MAIL3 are all members of the PMD-C family that also includes MAIL2 [15]. Since our  
353 objective is to retrace the evolution of genic (and not TE-containing) PMD-C, we have decided to  
354 restraint our search to Eudicots. Indeed, Eudicot species contain mainly genic PMD-C, while other  
355 angiosperms may contain variable numbers of closely related genic and TE-associated PMD-C motifs  
356 that would be difficult to distinguish in our analysis. To retrace the evolution history of the genic PMD-  
357 C family, we used *A. thaliana* PMD-C genes to search and collect their relatives (paralogues and

358 orthologues) in 30 genomes representative of the Eudicot diversity (see S8 Table for a list of species  
359 and their corresponding codes used in Fig 8, and S9 Table for motif sequences).

360 In our phylogenetic analysis, the genic PMD-C family can be clearly separated in two major  
361 clades. The first clade is composed of orthologues of *A. thaliana* MAIL2, MAIL1 and MAIN, while the  
362 second one includes orthologues of *A. thaliana* MAIL3 (Fig 8A). MAIL2 orthologues were found in all  
363 species tested, forming a closely related group, which suggests that they are under strong purifying  
364 selection (see the very short branch lengths linking most MAIL2 genes in Fig 8A). In several species,  
365 additional MAIL2 paralogues were also detected. They were either imbedded in the major MAIL2  
366 group, or forming independent and more divergent subgroups, like in the case of MAIL1 and MAIN  
367 that are Brassicaceae-specific MAIL2 paralogues. By comparison, MAIL3 orthologues were not found  
368 in all Eudicot species tested, and, except in Brassicaceae, MAIL3 genes appear to be under much  
369 weaker purifying selection compare to MAIL2 and MAIL2-like genes (see the longer branch lengths in  
370 the tree of Fig 8A). Brassicaceae MAIL3 genes contrast with other MAIL3, by forming a closely related  
371 group in the phylogenetic tree. This suggests a clear change in selection pressure, typical of a  
372 neofunctionalization event that could correlate with the acquisition of the PPP motif by these genes  
373 (Fig 8B and see below). Remarkably, another fusion event between PMD-C and PPP motifs occurred  
374 independently in grapevine, but this time involving a MAIL2 paralogue (VvMAIL2.2, Fig 8A).

375 We then used the PPP motif found in *A. thaliana* MAIL3, to collect orthologous genes and  
376 retrace the evolution history of this motif in the same Eudicot species used above. We confirmed that  
377 these genes can be clearly separated in two distinct clades: PP7 and PP7-like (PP7L) (Fig 8B). All tested  
378 species present one or several closely related PP7 paralogues. Although the Brassicaceae MAIL3 PPP  
379 motif belongs to the PP7 clade, it diverged significantly compared to other standalone PP7 paralogues  
380 (Fig 8B). Same observation was made regarding the PP7 domain of VvMAIL2.2. Thus, as described for  
381 the PMD of Brassicaceae MAIL3 and grapevine VvMAIL2.2, this suggests a fast-evolving period and  
382 neofunctionalization of the PP7 domain in these species, subsequently to the PMD-C/PP7 fusion.  
383 Conversely, PP7L orthologues were not found in all species tested and, accordingly, these genes are

384 under weaker purifying selection compare to genes belonging to the PP7 subfamily. In conclusion,  
385 phylogenetic analyses showed that, in at least Brassicaceae and grapevine, neo-association of PMD-C  
386 and PP7 domains have potentially create new protein functions that were maintained through  
387 evolution.

388

## 389 **DISCUSSION**

390 In *A. thaliana*, MAIN and MAIL1 are standalone PMD proteins that have been involved in  
391 genome integrity, regulation of cell division and differentiation, and silencing of TEs [15-17]. In this  
392 study, we show that TE silencing is widely impaired in the *ddc main-3* higher order mutant, which is  
393 both partially defective in DNA methylation and MAIN activity. We also identify the putative  
394 phosphatase protein PP7L as MAIN and MAIL1 protein interactor, and show that among the loci that  
395 are commonly misregulated in *pmd* and *pp7l* single and double mutants, a substantial fraction of  
396 downregulated genes carries the 'DOWN' DNA motif in their promoter. Finally, phylogenetic analyses  
397 among Eudicots suggest a mechanism of neofunctionalization between the PMD and PP7-type PPP,  
398 to potentially acquire a functional module that requires the two protein domains.

399

400 **The PMD MAIN protein acts independently of DRM2- and CMT3 pathways to silence TEs and DNA-**  
401 **methyated genes.**

402 Previous analyses showed that some TEs were synergistically upregulated in the *mail1 rdr2*  
403 double mutant plants, suggesting that MAIL1 acts independently of RdDM pathway [15]. In our whole  
404 genome transcriptomic analyses, we show that several TEs and DNA-methylated genes are  
405 upregulated in both *main-3* and *ddc* mutants, as well as in the *ddc main-3* quadruple mutant (Fig 2  
406 and S2 Fig). We also identify TEs that are upregulated in either *ddc* or *main-3* mutants, but display  
407 stronger misregulation in the *ddc main-3* higher order mutant (Fig 2 and S2 Fig). Finally, we identify a  
408 large class of TEs that are only upregulated in *ddc main-3* (Fig 2 and S2 Fig). Altogether, these analyses  
409 reveal complex genetic interaction between the MAIN, DRM2 and CMT3 proteins to silence TE.



410 Previous work showed that DNA methylation is not impaired in *mail1-1* [15]. We found that DNA  
411 methylation is mostly unaffected in the *main-2* null mutant. However, we detected a mild but  
412 significant hypermethylation at non-CG sites in TEs and pericentromeric genes (Fig 4). One hypothesis  
413 is that CHG and CHH hypermethylation observed in *main-2* is a backup mechanism to compensate for  
414 MAIN loss of function, and to dampen TE silencing defects. Although further studies will be required  
415 to test this hypothesis, it is consistent with the fact that combining the *main-3* and *ddc* mutations  
416 leads to an exacerbation of TE silencing defects. Thus MAIN, DRM2 and CMT3 pathways cooperate to  
417 silence TE. Synergistic effects between different epigenetic pathways have already been described.  
418 For instance, it has been shown that MORPHEUS MOLECULE 1 (MOM1) and MORC1/MORC6 proteins,  
419 or MOM1 and the RdDM pathway act synergistically to efficiently silence TEs [13, 30]. Altogether,  
420 these observations contribute to the “mille-feuille” (i.e. “multiple layers”) model, in which different  
421 epigenetic pathways converge towards the silencing of TEs [31].

422

423 **The putative phosphatase PP7L interacts with the PMD MAIN and MAIL1 protein to regulate a**  
424 **similar set of genes and TEs.**

425 Recently, the putative phosphoprotein phosphatase PP7L was involved in the biogenesis of  
426 chloroplasts and plant response upon abiotic stress [25]. Here, we show that PP7L interact with MAIN  
427 and MAIL1, and *main-2*, *pp7l-2*, *mail1-1* single and *mail1-1 pp7l-2* double mutant plants display similar  
428 developmental and molecular phenotypes (Fig 5 and 6). We also show that, as described for *main-2*  
429 and *mail1-1* [15], the subnuclear distribution of chromocenters and H3K9me2 are unaltered in *pp7l-2*  
430 (Fig 7). The 106B pericentromeric repeats appeared decondensed in *main-2* and *mail1-1* mutants [15],  
431 future work will determine if similar phenotype is observed in *pp7l-2*. Although MAIN, MAIL1 and PP7L  
432 interact together, we cannot exclude that an additional protein is required for the interaction. In  
433 addition, PP7L may have additional partners independently of MAIN and MAIL1. Further biochemical  
434 studies such as IP-MS analyses using the FLAG-tagged PP7L line will contribute to addressing these  
435 points.

436 Transcriptomic analyses revealed complex genetic interaction between MAIN, MAIL1 and PP7L;  
437 the three proteins acting either independently or together to ensure the proper expression of genes,  
438 and to perform TE silencing. Moreover, transcriptome profiling of *mail1-1 pp7l-2* double mutant  
439 revealed that the two mutations may have synergistic effects, specifically at genes that are  
440 upregulated in the mutant. To further study the genetic interaction between the three proteins, it will  
441 be important to analyze the transcriptome of *main-2 mail1-1 pp7l-2* triple mutant. Altogether and  
442 considering that *i)* MAIN, DRM2 and CMT3 pathways cooperate to silence TEs, and *ii)* the *main-2*  
443 mutant show a slight increase in DNA methylation at CHG and CHH sites, we cannot rule out that MAIN  
444 is playing a dual role: regulating gene expression through its interaction with MAIL1 and PP7L, and  
445 involved in TE silencing through its genetic interaction with DNA methylation. In the future, it will be  
446 important to analyze DNA methylation in *pp7l-2*, but also in *pmd pp7l-2* higher order mutants. In  
447 parallel, studying the *ddc pp7l-2* mutant will allow to further decipher the genetic interaction between  
448 the PP7L and DNA methylation pathways.

449

450 **A fraction of genes that are commonly downregulated in *main*, *mail1* and *pp7l* mutants carry the**  
451 **‘DOWN’ motif in their promoters.**

452 A substantial fraction of genes that are commonly downregulated in *main-2*, *mail1-1*, *pp7l-2*  
453 and *mail1-1 pp7l-2* carry the ‘DOWN’ motif in their promoter (S5E Fig and S7 Table). Furthermore,  
454 twenty-five out of twenty-six genes commonly downregulated in the all the mutant backgrounds  
455 analyzed in this study - except *ddc* - carry the ‘DOWN’ DNA motif in their promoter (S5E Fig and S7  
456 Table). The ‘DOWN’ motif is also enriched in fractions of downregulated genes in *main-2*, *mail1-1*,  
457 *mail1-1 pp7l-2*, *main-3* and *ddc main-3*. However, it is not enriched among downregulated genes in  
458 *pp7l-2* mutant. One explanation for this discrepancy is that too many loci were identified as  
459 downregulated in *pp7l-2*, which created a dilution of the loci carrying the ‘DOWN’ motif in their  
460 promoter.

461           Based on our results, we hypothesize that the ‘DOWN’ motif may act as a putative cis-  
462 regulatory element (CRE) recognized by an unidentified TF, which would be required for the  
463 transcription of genes identified as downregulated in *pmd* and *pp7l* mutants. This unknown TF could  
464 be recruited or activated by the MAIN/MAIL1/PP7L protein complex. Another hypothesis is that the  
465 ‘DOWN’ motif is directly recognized by the MAIN/MAIL1/PP7L protein complex. Further study will be  
466 required to test if MAIN/MAIL1/PP7L protein complex interact with chromatin, and bind the ‘DOWN’  
467 motif. In parallel, further biochemical analyses may allow to identify an uncharacterized putative TF  
468 as MAIN/MAIL1/PP7L protein interactor.

469           Altogether, these analyses suggest that MAIN, MAIL1 and PP7L are involved in three distinct  
470 activities. First, they are required for the silencing of TEs and DNA-methylated genes, cooperating with  
471 canonical epigenetic factors such as DRM2 and CMT3 to efficiently repress these loci. Second, they  
472 are required for the repression of subsets of genes that are not targeted by DNA methylation. For this  
473 category of loci, one hypothesis is that MAIN, MAIL1 and PP7L may act as transcriptional repressor.  
474 Third, MAIN, MAIL1 and PP7L are required for the transcriptional activation of several genes, and  
475 fractions of those genes carry the ‘DOWN’ motif in their promoter. In the future, it will be important  
476 to determine the molecular mechanisms that are involved in these three activities of MAIN, MAIL1  
477 and PP7L.

478

#### 479 **The association of PMD-C and PP7/PP7L domains creates a functional protein module.**

480           In this study, we identified PP7L has a protein partner of the two standalone PMDs MAIN and  
481 MAIL1, and showed that these proteins are required for the proper expression of a common set of  
482 genes, and for TE silencing. Besides, we showed that the Brassicaceae MAIL3 and the grapevine  
483 VvMAIL2.2 proteins carry a PMD fused to a PP7 domain. Based on these results, we hypothesize that  
484 depending on the configuration, the association of PMD-C and PP7/PP7L domains would create a  
485 functional protein module in trans or in cis. It is likely that the cis-association of PMD and PP7 found  
486 in the Brassicaceae MAIL3 proteins occurred in the common ancestors of this Eudicot lineage, possibly

487 through the process of gene duplication. Since then, the MAIL3 PMD/PP7 fusion was maintained  
488 under strong purifying selection, arguing for a neofunctionalization of the fusion protein. It is likely  
489 that a similar process happened in grapevine, and possibly, in closely related Vitaceae species. To  
490 some extent, the two distinct events that occurred in Brassicaceae and grapevine are reminiscent of  
491 convergent evolution processes leading to the production of a functional PMD/PP7 module.

492 The occurrence of PMD and PP7/PP7L protein fusion in several Brassicaceae and grapevine is  
493 reminiscent of the concept of Rosetta stone chimera proteins, which describes that two proteins  
494 interacting together in one organism can be found fused together in another species to facilitate  
495 enzymatic activity [32]. There are several examples of Rosetta stone proteins, described for instance  
496 with different subunits of DNA topoisomerase or RNA polymerase [32]. Here, we show that, at least  
497 in *A. thaliana*, the Rosetta stone chimera MAIL3 coexist with its close homologs MAIN/MAIL1 and PP7L  
498 that interact together. The fact that the PMD and PP7 domains are fused together in MAIL3 may be a  
499 strategy to optimize protein activity. Conversely, the enzymatic activity of the MAIN/MAIL1/PP7L  
500 protein complex could be further regulated by allowing, or not, the three proteins to interact together.  
501 Nevertheless, in both scenarios, it is likely that PMD and PP7/PP7L association creates a functional  
502 protein module, which might be specialized in distinct biological processes depending on its  
503 composition. Thus, we hypothesize that the MAIL3 and MAIN/MAIL1/PP7L protein complexes play  
504 different role in the plant. This is consistent with the fact that, unlike *main-2*, *mail1-1* and *pp7l-2*  
505 mutant, the *mail3-2* mutant does not show abnormal developmental phenotype [17]. Further studies  
506 will be required to describe the role of MAIL3 in the plants.

507 In conclusion, we show here that the two *A. thaliana* PMD MAIN and MAIL1 proteins interact with  
508 PP7L, and are involved in the regulation of a common set of genes and TEs. In addition, we show that  
509 distinct events of PMD-C and PP7 fusions have occurred among the Eudicots (among several  
510 Brassicaceae species and in grapevine), suggesting some convergent evolution processes and a  
511 potential neofunctionalization of PMD/PP7 module in cis. The biological significance of PMD/PP7  
512 fusion proteins will be investigated in the future by studying the role of MAIL3 in *A. thaliana*. In

513 addition, it will be important to determine whether the PMD proteins play important roles in other  
514 plant species with agronomic value.

515

## 516 MATERIALS AND METHODS

517

518 **Plant material and growing conditions.** All the plant material is in the Columbia (Col) ecotype. Col=  
519 Non-transgenic WT Columbia ecotype. The *drm1-2* (SALK\_031705), *drm2-2* (SALK\_150863), *cmt3-11*  
520 (SALK\_148381), *ddc* triple, *main-2* (GK-728H05), *mail1-1* (GK-840E05) and *pp7l-2* (SALK\_003071) null  
521 mutant lines were previously described [15-17, 25, 26], and obtained from The Nottingham  
522 Arabidopsis Stock Centre. The *mail1-1 pp7l-2* double mutant was obtained by crossing the respective  
523 single mutants. T-DNA insertions were confirmed by PCR-based genotyping and RT-qPCR analyses.  
524 The *ATCOPIA28::GFP* WT line (WT) carries the transgene in WT Col ecotype. The *ATCOPIA28::GFP ddc*  
525 line (*ddc*) carries the transgene in *ddc*. The *ATCOPIA28::GFP ddc main-3* line (*ddc main-3= ddc #16*)  
526 carries the transgene in the *ddc main-3* background. The *ATCOPIA28::GFP main-3* line (*main-3*) was  
527 obtained by backcrossing *ddc main-3* with WT, F1 plants were self-fertilized, and F2 plants were  
528 screened by PCR-based genotyping to identify plants homozygote for the *main-3* mutation and WT for  
529 *DRM2* and *CMT3*. The *main-3* mutant allele was scored by derived cleaved amplified polymorphic  
530 sequences (dCAPS) using the restriction enzyme FokI. Primer sequences are described in S10 Table.  
531 All the WT Col and T-DNA mutant plants were grown on soil under a 16h-light/8h-dark cycle. When  
532 experiments required to screen for GFP expression under UV light, plants carrying the  
533 *ATCOPIA28::GFP* transgene were first grown on Murashige and Skoog (MS) plates under continuous  
534 light, 10-day old plants were then screened for GFP expression under UV light, and subsequently  
535 transferred onto soil. For *in vitro* plant culture, seeds were surface-sterilized and sowed on solid MS  
536 medium containing 0.5% sucrose (w/v).

537

538 **Cloning of ATCOPIA28::GFP.** The pCambia3300-NLS-GFP-T35S vector was previously described [12].  
539 The 5'LTR promoter corresponding to a region of ~1 kb upstream of *ATCOPIA28* (*AT3TE51900*) was  
540 PCR amplified from WT genomic DNA, and cloned into pCR2.1 TOPO vector (Invitrogen). Quikchange  
541 site-directed mutagenesis (Stratagene) was performed according to Manufacturer's instruction to  
542 create a polymorphism site (MfeI→NdeI) within the 5'LTR promoter, which was subsequently  
543 mobilized into pCambia3300 upstream of NLS-GFP-T35S sequence. *ddc* triple mutant plants were  
544 transformed with the *ATCOPIA28::GFP* construct using the *Agrobacterium*-mediated floral dip  
545 method [33]. Transgenic plants showing GFP fluorescence were backcrossed with a WT plant to  
546 promote the silencing of *ATCOPIA28::GFP* in the F1 generation. F1 plants were self-crossed and their  
547 F2 progenies were screened for GFP fluorescence, and PCR-based genotyped to obtain  
548 *ATCOPIA28::GFP* WT and *ATCOPIA28::GFP ddc* plants. Primer sequences used for *ATCOPIA28::GFP*  
549 cloning and PCR genotyping are described in S10 Table.

550

551 **EMS mutagenesis, GFP screening and mapping analyses.** Five thousand seeds of *ATCOPIA28::GFP ddc*  
552 were mutagenized in 0.26% EMS solution for 12 hours with rotation. Seeds were subsequently washed  
553 with water and sown on soil. Fifteen hundred M2 populations were collected, and subsequently  
554 screened for GFP fluorescence under UV light using a SMZ18 Nikon Fluorescence Stereomicroscope  
555 coupled with the C-HGFI intensilight fluorescence filter. Pictures were taken using the DS Qi1MC digital  
556 camera kit. Mapping and identification of the EMS mutation responsible for the phenotype were  
557 performed by bulk segregant analysis coupled with deep genome re-sequencing as previously  
558 described [12], with the following differences. Reads were mapped against the reference genome  
559 (*Arabidopsis* TAIR10) and single nucleotide polymorphisms called in Geneious (Biomatters). Using R,  
560 single nucleotide polymorphisms were filtered for EMS mutations (G:C→A:T) and zygosity called  
561 based on the variant frequency provided by Geneious (≥80% homozygous mutation, ≥45%, and ≤55%  
562 heterozygous mutation). Plots were then created by calculating the ratio of the number of  
563 homozygous and heterozygous and mutations in a 500-kb window as previously described [34].

564

565 **Cloning of epitope-tagged versions of PMD and PP7L proteins.** *MAIN*, *MAIL1* and *PP7L* genomic  
566 regions were PCR amplified and FLAG or Myc epitopes were added to the C-terminus of each protein  
567 as previously described [12]. Each time, the amplified region includes a ~1Kb promoter sequence  
568 upstream of the respective transcriptional start site. For the *MAIN* promoter, a *MluI* site was modified  
569 to allow LR reaction without changing the sequence integrity of the gene. *main-2*, *mail1-1* and *pp7l-2*  
570 mutant plants were transformed with the *MAIN-FLAG*, *MAIN-MYC*, *MAIL1-MYC* and *PP7L-*  
571 *FLAG* constructs using the *Agrobacterium*-mediated floral dip method [33]. Primer sequences are  
572 described in S10 Table.

573

574 **IP and MS analysis.** Ten grams of 3-week-old seedling tissue were ground in liquid nitrogen and  
575 resuspended in 50mL ice-cold IP buffer [50mM Tris HCl pH 7.6, 150mM NaCl, 5mM MgCl<sub>2</sub>, 0.1%  
576 Nonidet P-40, 10% glycerol (v/v), 0.5mM DTT, 1x Protease Inhibitor Mixture (Roche)] and centrifuged  
577 2 times for 15 min at 4°C at 15 350g. 400μL of M2 magnetic FLAG-beads (Sigma, M8823) were added  
578 to the supernatants, and incubated for 90min rotating at 4°C. M2 magnetic FLAG-beads were washed  
579 seven times in ice-cold IP buffer for 5 min rotating at 4°C, and immunoprecipitated proteins were  
580 eluted 3 times with 150μL 3x-FLAG peptides (Sigma, F4799) for 25 min each at 25°C. The eluted protein  
581 complexes were precipitated by trichloroacetic acid and subjected to MS analyses as previously  
582 described [13]. Peptide and protein-level false discovery rates were calculated by the DTASelect  
583 algorithm using the decoy database approach. Based on a peptide PSM level p-value filter of less than  
584 0.01 and a requirement for at least two peptides per protein, the protein-level false discovery rate  
585 was less than 1% for all proteins detected.

586

587 **Co-IP and immunoblotting.** 0.5 g of 3-week-old seedling tissue were ground in liquid nitrogen,  
588 resuspended in 1.5mL ice-cold IP buffer [50mM Tris pH 7.6, 150mM NaCl, 5mM MgCl<sub>2</sub>, 0.1% Nonidet  
589 P-40, 10% glycerol, 0.5 mM DTT, 1x Protease Inhibitor Mixture (Roche)], and centrifuged 2 times for

590 15 min at 4°C, 16 000g. 50µL M2 magnetic FLAG-beads (Sigma, M8823) were added to the  
591 supernatants and incubated for 2 hour rotating at 4°C. Beads were washed 3 times in ice-cold IP buffer  
592 for 10 min rotating at 4°C. Immunoprecipitated proteins were denatured in Laemmli buffer for 5min  
593 at 95°C. 10µL of input and bead elution were run on 10% SDS-PAGE gels, and proteins were detected  
594 by western blotting using either Anti-FLAG M2 monoclonal antibody-peroxidase conjugate (Sigma,  
595 A8592) at a dilution of 1:10000, or c-Myc rat monoclonal antibody (Chromotek, 9E1-100) at a dilution  
596 of 1:1000 followed by goat anti-rat IgG horseradish peroxidase (Abcam, ab205720) used at a dilution  
597 of 1:20000 as secondary antibody. Western blots were developed using Substrat HRP Immobilon  
598 Western (Merck Millipore, WBKLS0500).

599

600 **RNA extraction.** Total RNA was extracted from aerial parts of 3-week-old seedlings grown on soil using  
601 either RNeasy Plant Mini Kit (Qiagen, 74904) or Monarch Total RNA Miniprep Kit (NEB, T2010)  
602 according to the manufacturer's protocols.

603

604 **RNA sequencing.** RNA-seq libraries were generated from 1µg of input RNA using NEBNext Ultra II  
605 Directional RNA Library Prep Kit for Illumina (NEB, E7490) according to the manufacturer's protocols.  
606 Libraries were sequenced on an Illumina HiSeq 4000 or NextSeq 550 machines. Reads were trimmed  
607 using Trimmomatic [35], and mapped to the *A. thaliana* genome (*Arabidopsis* TAIR10 genome) using  
608 HISAT2 [36]. The sequence alignment files were sorted by name and indexed using SAMtools [37].  
609 Files were converted to BAM files and number of reads mapped onto a gene calculated using HTSeq-  
610 count [38]. Differentially expressed genes were obtained with DESeq2 [39], using a log<sub>2</sub> fold-change  
611  $\geq 2$  (up-regulated genes) or  $\leq -2$  (down-regulated genes) with an adjusted *p*-value of 0,01. Batch effects  
612 were modeled within the DESeq2 study design. For PCA, we removed the batch effect using limma's  
613 'removeBatchEffect' function [40]. Heat map visualizations were realized using the heatmap2 function  
614 from the R gplots package. Boxplots were realized using boxplot function from R. Re-analyses of



615 previously published RNA-seq datasets from *main-2* and *mail1-1* (PRJEB15202) [15] were performed  
616 as described above.

617

618 **RT-qPCR.** 1 µg of input RNA was converted to cDNA using GoScript Reverse Transcriptase (Promega  
619 A501C) according to the manufacturer's protocol. The final reaction was diluted 6 times with RNase  
620 free water. RT-qPCR experiments were performed with 4µL of cDNA combined to the Takyon No Rox  
621 SYBR MasterMix (Eurogentec, UF-NSMT-B0701), using a LightCycler 480 instrument (Roche).  
622 Amplification conditions were as follows: 95°C 5 min; 45 cycles, 95°C 15s, 60°C 15s, 72°C 30s; melting  
623 curves. RT-qPCR analyses used the  $2^{-\Delta\Delta Ct}$  method. For each analysis,  $\Delta Ct$  was first calculated based on  
624 the housekeeping *RHIP1* gene Ct value [41].  $\Delta\Delta Ct$  were then obtained by subtracting the wt  $\Delta Ct$  from  
625 the  $\Delta Ct$  of each sample. Values were represented on bar charts relative to WT. Three technical  
626 replicates were performed per biological replicate, and 3 biological replicates were used in all  
627 experiments, unless otherwise stated. Primer sequences are described in S10 Table.

628

629 **DNA motif detection.** The motifs for enhancer sequences (1kb upstream the TSS) were discovered  
630 using MEME (Multiple Em for Motif Elicitation). MEME represents motifs as position-dependent  
631 letter-probability matrices which describe the probability of each possible letter at each position in  
632 the pattern [42].

633

634 **Bisulfite sequencing.** Genomic DNA was extracted from aerial parts of 3-week-old seedlings using  
635 Quick-DNA Plant/Seed Miniprep Kit (Zymo research, D6020) according to the manufacturer's protocol.  
636 Whole genome bisulfite sequencing (WGBS) library was prepared from 50 ng genomic DNA using  
637 NuGen Ovation Ultralow Methyl-Seq kit. Bisulfite treatment was carried out by Qiagen Epitect bisulfite  
638 kit. WGBS libraries were sequenced on an Illumina HiSeq 4000 machine. The raw reads (single end)  
639 were trimmed using Trimmomatic in order to remove adapter sequences [35]. The remaining  
640 sequences were aligned against the *A. thaliana* genome TAIR10 version using Bismark [43]. Duplicated

641 reads were collapsed into one read. For metaplot and boxplot visualization, we used ViewBS [44].  
642 Boxplots were realized using boxplot function from R. DMRs (differentially methylated regions) were  
643 defined comparing methylation in wildtype with the *main-2* mutant analyzed using the R package  
644 “DMRcaller” [45]. We used “noise filter” method to compute CpG, CpHpG and CpHpH DMRs. We  
645 selected bins where the p-value was less than 0.01, the difference in methylation level was at least  
646 40% in the CG context, 20% in the CHG context or 10% in the CHH context, with at least four cytosines;  
647 each cytosine had on average at least four reads.

648

#### 649 **Sequence selection, multiple sequences alignments and phylogenetic reconstruction.**

650 Blast searches (blastp) were performed starting from known *A. thaliana* PMD-C and PP7/PP7L motifs  
651 on the thirty species representing the diversity of the Eudicot lineages. When necessary tblastn  
652 searches were also used to obtain complete protein sequences. To build the phylogenetic trees, PMD-  
653 C or PP7/PP7L motifs were aligned using the multiple sequence comparison by log-expectation  
654 (MUSCLE v3.7) software [46]. Trees were reconstructed using the fast-maximum likelihood tree  
655 estimation program PHYML [47] using the LG amino acids replacement matrix [48]. Statistical support  
656 for the major clusters were obtained using the approximate likelihood-ratio test (aLRT) [49].

657

658 **Immunofluorescence and DAPI-staining.** Leaves from 3-week-old plants, were fixed for 20 min  
659 rotating at 4°C in 2% formaldehyde in Tris buffer (10 mM Tris-HCl pH 7.5, 10 mM EDTA, 100 mM NaCl),  
660 washed two times for 10 min rotating at 4°C in cold Tris buffer and subsequently chopped in LB01  
661 buffer (15 mM Tris-HCl pH 7.5, 2 mM EDTA, 0.5 mM spermine, 80 mM KCl, 20mM NaCl and 0.1%  
662 Triton- X-100). Nuclei were filtered through a 30 µm cell strainer cap (Sysmex, 04-0042-2316) and 5µl  
663 of the nuclei solution was diluted in 10 µl of sorting buffer (100mM Tris-HCl pH 7.5, 50 mM KCl, 2 mM  
664 MgCl<sub>2</sub>, 0.05% Tween-20 and 5% sucrose). 20µl of the nuclei dilution were spread onto a polylysine  
665 slide and air-dried for 40 min. Slides were post-fixed in 2% formaldehyde in 1X PBS for 5 min and  
666 washed 2 times with water. Slides were incubated 15 min in 1X PBS, 0.5% Triton X-100 at RT and

667 washed 3 times with 1X PBS for 5 min. For detection, slides were incubated over night with a mouse  
668 anti-H3K9me2 monoclonal antibody (Abcam, Ab 1220) at 1:500 in 3% BSA, 0.05% Tween in 1X PBS at  
669 4°C in a moist chamber. After 3 washes in 1X PBS for 5 min, slides were incubated 2h with a goat anti-  
670 mouse antibody coupled to Alexa fluor 568 (Invitrogen, A11004) at 1:1000 in 3% BSA, 0.05% Tween in  
671 1X PBS in a moist chamber. Slides were washed 1 time 5 min with 1X PBS, 1 time 10 min with 1X PBS,  
672 1µg/mL DAPI, and 1 time 5 min with 1X PBS. DNA was counterstained with 1µg/mL DAPI in Vectashield  
673 mounting medium (Vector Laboratories). Observation and imaging were performed using a LSM 700  
674 epifluorescence microscope (Zeiss).

675

676 **Data availability.** Nucleotide sequencing data generated in this study have been deposited in  
677 European Nucleotide Archive (ENA) under the accession number PRJEB33240  
678 (<http://www.ebi.ac.uk/ena/data/view/PRJEB33240>). The proteomics data have been deposited to the  
679 MassIVE data repository (<https://massive.ucsd.edu>) with the dataset identifier MSV000084089. All  
680 other data and material are available within the manuscript and its supplementary files, or from the  
681 corresponding author upon request.

682

## 683 **ACKNOWLEDGMENTS**

684 The authors want to thank Thierry Lagrange, Frederic Pontvianne and other team members for fruitful  
685 discussions, and all the LGDP platform members for their outstanding technical assistance and plant  
686 care.

## 687 **REFERENCES**

688

- 689 1. Grewal SI, Jia S. Heterochromatin revisited. *Nat Rev Genet.* 2007;8(1):35-46.
- 690 2. Slotkin RK, Martienssen R. Transposable elements and the epigenetic regulation of the  
691 genome. *Nat Rev Genet.* 2007;8(4):272-85.
- 692 3. Deniz O, Frost JM, Branco MR. Regulation of transposable elements by DNA modifications.  
693 *Nat Rev Genet.* 2019;20(7):417-31.
- 694 4. Dergai O, Hernandez N. How to Recruit the Correct RNA Polymerase? Lessons from snRNA  
695 Genes. *Trends Genet.* 2019;35(6):457-69.
- 696 5. Law JA, Jacobsen SE. Establishing, maintaining and modifying DNA methylation patterns in  
697 plants and animals. *Nat Rev Genet.* 2010;11(3):204-20.

- 698 6. Matzke MA, Mosher RA. RNA-directed DNA methylation: an epigenetic pathway of  
699 increasing complexity. *Nat Rev Genet.* 2014;15(6):394-408.
- 700 7. Wendte JM, Pikaard CS. The RNAs of RNA-directed DNA methylation. *Biochim Biophys Acta.*  
701 2016.
- 702 8. Du J, Johnson LM, Jacobsen SE, Patel DJ. DNA methylation pathways and their crosstalk with  
703 histone methylation. *Nat Rev Mol Cell Biol.* 2015;16(9):519-32.
- 704 9. Zhang H, Lang Z, Zhu JK. Dynamics and function of DNA methylation in plants. *Nat Rev Mol*  
705 *Cell Biol.* 2018;19(8):489-506.
- 706 10. Zemach A, Kim MY, Hsieh PH, Coleman-Derr D, Eshed-Williams L, Thao K, et al. The  
707 *Arabidopsis* nucleosome remodeler DDM1 allows DNA methyltransferases to access H1-containing  
708 heterochromatin. *Cell.* 2013;153(1):193-205.
- 709 11. Stroud H, Do T, Du J, Zhong X, Feng S, Johnson L, et al. Non-CG methylation patterns shape  
710 the epigenetic landscape in *Arabidopsis*. *Nat Struct Mol Biol.* 2014;21(1):64-72.
- 711 12. Moissiard G, Cokus SJ, Cary J, Feng S, Billi AC, Stroud H, et al. MORC family ATPases required  
712 for heterochromatin condensation and gene silencing. *Science.* 2012;336(6087):1448-51.
- 713 13. Moissiard G, Bischof S, Husmann D, Pastor WA, Hale CJ, Yen L, et al. Transcriptional gene  
714 silencing by *Arabidopsis* microorchidia homologues involves the formation of heteromers. *Proc Natl*  
715 *Acad Sci U S A.* 2014;111(20):7474-9.
- 716 14. Lorkovic ZJ, Naumann U, Matzke AJ, Matzke M. Involvement of a GHKL ATPase in RNA-  
717 directed DNA methylation in *Arabidopsis thaliana*. *Curr Biol.* 2012;22(10):933-8.
- 718 15. Ikeda Y, Pelissier T, Bourguet P, Becker C, Pouch-Pelissier MN, Pogorelnik R, et al.  
719 *Arabidopsis* proteins with a transposon-related domain act in gene silencing. *Nat Commun.*  
720 2017;8:15122.
- 721 16. Wenig U, Meyer S, Stadler R, Fischer S, Werner D, Lauter A, et al. Identification of MAIN, a  
722 factor involved in genome stability in the meristems of *Arabidopsis thaliana*. *Plant J.* 2013;75(3):469-  
723 83.
- 724 17. Uhlken C, Horvath B, Stadler R, Sauer N, Weingartner M. MAIN-LIKE1 is a crucial factor for  
725 correct cell division and differentiation in *Arabidopsis thaliana*. *Plant J.* 2014;78(1):107-20.
- 726 18. Babu MM, Iyer LM, Balaji S, Aravind L. The natural history of the WRKY-GCM1 zinc fingers  
727 and the relationship between transcription factors and transposons. *Nucleic Acids Res.*  
728 2006;34(22):6505-20.
- 729 19. Steinbauerova V, Neumann P, Novak P, Macas J. A widespread occurrence of extra open  
730 reading frames in plant Ty3/gypsy retrotransposons. *Genetica.* 2011;139(11-12):1543-55.
- 731 20. Farkas I, Dombradi V, Miskei M, Szabados L, Koncz C. *Arabidopsis* PPP family of  
732 serine/threonine phosphatases. *Trends Plant Sci.* 2007;12(4):169-76.
- 733 21. Sun X, Kang X, Ni M. Hypersensitive to red and blue 1 and its modification by protein  
734 phosphatase 7 are implicated in the control of *Arabidopsis* stomatal aperture. *PLoS Genet.*  
735 2012;8(5):e1002674.
- 736 22. Liu HT, Li GL, Chang H, Sun DY, Zhou RG, Li B. Calmodulin-binding protein phosphatase PP7 is  
737 involved in thermotolerance in *Arabidopsis*. *Plant Cell Environ.* 2007;30(2):156-64.
- 738 23. Genoud T, Santa Cruz MT, Kulisic T, Sparla F, Fankhauser C, Metraux JP. The protein  
739 phosphatase 7 regulates phytochrome signaling in *Arabidopsis*. *PLoS One.* 2008;3(7):e2699.
- 740 24. Uhrig RG, Labandera AM, Moorhead GB. *Arabidopsis* PPP family of serine/threonine protein  
741 phosphatases: many targets but few engines. *Trends Plant Sci.* 2013;18(9):505-13.
- 742 25. Xu D, Marino G, Klingl A, Enderle B, Monte E, Kurth J, et al. Extrachloroplastic PP7L Functions  
743 in Chloroplast Development and Abiotic Stress Tolerance. *Plant Physiol.* 2019.
- 744 26. Stroud H, Greenberg MV, Feng S, Bernatavichute YV, Jacobsen SE. Comprehensive analysis  
745 of silencing mutants reveals complex regulation of the *Arabidopsis* methylome. *Cell.* 2013;152(1-  
746 2):352-64.
- 747 27. Franz P, de Jong H. From nucleosome to chromosome: a dynamic organization of genetic  
748 information. *Plant J.* 2011;66(1):4-17.

- 749 28. Zhao S, Cheng L, Gao Y, Zhang B, Zheng X, Wang L, et al. Plant HP1 protein ADCP1 links  
750 multivalent H3K9 methylation readout to heterochromatin formation. *Cell Res.* 2019;29(1):54-66.
- 751 29. Tessadori F, Schulkes RK, van Driel R, Franz P. Light-regulated large-scale reorganization of  
752 chromatin during the floral transition in Arabidopsis. *Plant J.* 2007;50(5):848-57.
- 753 30. Yokthongwattana C, Bucher E, Caikovski M, Vaillant I, Nicolet J, Mittelsten Scheid O, et al.  
754 MOM1 and Pol-IV/V interactions regulate the intensity and specificity of transcriptional gene  
755 silencing. *Embo J.* 2009;28(2):340-51.
- 756 31. Rigal M, Mathieu O. A "mille-feuille" of silencing: epigenetic control of transposable  
757 elements. *Biochim Biophys Acta.* 2011;1809(8):452-8.
- 758 32. Galperin MY, Koonin EV. Who's your neighbor? New computational approaches for  
759 functional genomics. *Nat Biotechnol.* 2000;18(6):609-13.
- 760 33. Clough SJ, Bent AF. Floral dip: a simplified method for Agrobacterium-mediated  
761 transformation of Arabidopsis thaliana. *Plant J.* 1998;16(6):735-43.
- 762 34. Hristova E, Fal K, Klemme L, Windels D, Bucher E. HISTONE DEACETYLASE6 Controls Gene  
763 Expression Patterning and DNA Methylation-Independent Euchromatic Silencing. *Plant Physiol.*  
764 2015;168(4):1298-308.
- 765 35. Bolger AM, Lohse M, Usadel B. Trimmomatic: a flexible trimmer for Illumina sequence data.  
766 *Bioinformatics.* 2014;30(15):2114-20.
- 767 36. Kim D, Langmead B, Salzberg SL. HISAT: a fast spliced aligner with low memory  
768 requirements. *Nat Methods.* 2015;12(4):357-60.
- 769 37. Li H, Handsaker B, Wysoker A, Fennell T, Ruan J, Homer N, et al. The Sequence  
770 Alignment/Map format and SAMtools. *Bioinformatics.* 2009;25(16):2078-9.
- 771 38. Anders S, Pyl PT, Huber W. HTSeq--a Python framework to work with high-throughput  
772 sequencing data. *Bioinformatics.* 2015;31(2):166-9.
- 773 39. Love MI, Huber W, Anders S. Moderated estimation of fold change and dispersion for RNA-  
774 seq data with DESeq2. *Genome Biol.* 2014;15(12):550.
- 775 40. Ritchie ME, Phipson B, Wu D, Hu Y, Law CW, Shi W, et al. limma powers differential  
776 expression analyses for RNA-sequencing and microarray studies. *Nucleic Acids Res.* 2015;43(7):e47.
- 777 41. Czechowski T, Stitt M, Altmann T, Udvardi MK, Scheible WR. Genome-wide identification and  
778 testing of superior reference genes for transcript normalization in Arabidopsis. *Plant Physiol.*  
779 2005;139(1):5-17.
- 780 42. Bailey TL, Boden M, Buske FA, Frith M, Grant CE, Clementi L, et al. MEME SUITE: tools for  
781 motif discovery and searching. *Nucleic Acids Res.* 2009;37(Web Server issue):W202-8.
- 782 43. Krueger F, Andrews SR. Bismark: a flexible aligner and methylation caller for Bisulfite-Seq  
783 applications. *Bioinformatics.* 2011;27(11):1571-2.
- 784 44. Huang X, Zhang S, Li K, Thimmapuram J, Xie S, Wren J. ViewBS: a powerful toolkit for  
785 visualization of high-throughput bisulfite sequencing data. *Bioinformatics.* 2018;34(4):708-9.
- 786 45. Catoni M, Tsang JM, Greco AP, Zabet NR. DMRcaller: a versatile R/Bioconductor package for  
787 detection and visualization of differentially methylated regions in CpG and non-CpG contexts.  
788 *Nucleic Acids Res.* 2018;46(19):e114.
- 789 46. Edgar RC. MUSCLE: multiple sequence alignment with high accuracy and high throughput.  
790 *Nucleic Acids Res.* 2004;32(5):1792-7.
- 791 47. Guindon S, Gascuel O. A simple, fast, and accurate algorithm to estimate large phylogenies  
792 by maximum likelihood. *Syst Biol.* 2003;52(5):696-704.
- 793 48. Le SQ, Gascuel O. An improved general amino acid replacement matrix. *Mol Biol Evol.*  
794 2008;25(7):1307-20.
- 795 49. Anisimova M, Gascuel O. Approximate likelihood-ratio test for branches: A fast, accurate,  
796 and powerful alternative. *Syst Biol.* 2006;55(4):539-52.
- 797 50. Bernatavichute YV, Zhang X, Cokus S, Pellegrini M, Jacobsen SE. Genome-wide association of  
798 histone H3 lysine nine methylation with CHG DNA methylation in Arabidopsis thaliana. *PLoS ONE.*  
799 2008;3(9):e3156.

800 51. Vergara Z, Gutierrez C. Emerging roles of chromatin in the maintenance of genome  
801 organization and function in plants. *Genome Biol.* 2017;18(1):96.

802

## 803 **FIGURE CAPTIONS**

804 **Fig 1. The *ddc #16* EMS population shows overexpression of *ATCOPIA28::GFP* and upregulation of**  
805 **endogenous TEs.**

806 (A) Schematic representation of the *ATCOPIA28::GFP* transgene. The 5' long terminal repeat (LTR)  
807 promoter region of an *ATCOPIA28* LTR-retrotransposon (*AT3TE51900*) is used to control the  
808 expression of GFP. The construct carries a Nuclear Localization Signal (NLS) to target the GFP in the  
809 nucleus. (B) WT and *drm1 drm2 cmt3 (ddc)* triple mutant plants carrying the *ATCOPIA28::GFP*  
810 transgene showed no and weak GFP fluorescence under UV light, respectively. By comparison, the *ddc*  
811 *#16* EMS mutant showed strong GFP fluorescence. Insets show plants under white light. (C) Western  
812 blot using anti-GFP antibody confirmed *ATCOPIA28::GFP* overexpression in *ddc #16*. Coomassie  
813 staining of the large Rubisco subunit (rbcL) is used as a loading control. KDa: kilodalton. (D) Relative  
814 expression analyses of *ATCOPIA28::GFP (GFP)* and three endogenous TEs in *ddc* and *ddc #16* assayed  
815 by Real-Time quantitative PCR (RT-qPCR). RT-qPCR analyses were normalized using the housekeeping  
816 *RHIP1* gene, and transcript levels in the mutants are represented relative to WT. Error bars indicate  
817 standard deviation based on three independent biological replicates. Screening of EMS mutant  
818 populations was done on MS plates to allow for visualization of GFP-positive individuals under UV  
819 light.

820

821 **Fig 2. MAIN, DRM2 and CMT3 act synergistically to repress TEs.**

822 (A) Representative pictures showing the developmental phenotype of 3-week-old *ddc*, *main-3* and *ddc*  
823 *main-3* mutants in comparison to WT plant. (B) Number of upregulated TEs in *ddc*, *main-3* and *ddc*



824 *main-3*, and classified by TE superfamily. (C) Chromosomal distributions of misregulated loci in *ddc*,  
825 *main-3* and *ddc main-3* over WT. Chromosome arms are depicted in light grey, pericentromeric  
826 regions in dark grey as defined in [50]. Upregulated genes and TEs are represented in blue and red,  
827 respectively; downregulated genes are represented in green. (D) Fraction of upregulated TEs in *ddc*,  
828 *main-3* and *ddc main-3* located in chromosome arms or in pericentromeric regions as defined in [50].  
829 Asterisks indicate statistically significant enrichments of TEs in pericentromeric regions in comparison  
830 to the genomic distribution of all *A. thaliana* TEs (Chi-Square test, \*: p-value $\leq$  0.05, \*\*: p-value $\leq$  0.01  
831 n.s: not significant). (E) Heatmap showing upregulated TEs in *ddc*, *main-3* and *ddc main-3* mutants in  
832 comparison to WT plants. (F-G) Relative expression analyses of *ATCOPIA28* (F) and several endogenous  
833 TEs (G) in *ddc*, *main-3*, *ddc main-3*, *cmt3 main-3* and *drm1 drm2 (dd) main-3* assayed by RT-qPCR. RT-  
834 qPCR analyses were normalized using the housekeeping *RHIP1* gene, and transcript levels in the  
835 mutants are represented relative to WT. Error bars indicate standard deviation based on three  
836 independent biological replicates. RNA-seq threshold:  $\log_2 \geq 2$ , or  $\log_2 \leq -2$ ; p-adj < 0.01.

837

838 **Fig 3. MAIN and MAIL1 are required for the proper expression of similar genes, and for TE silencing.**

839 (A-B) Number of misregulated genes (A) and upregulated TEs (B) in *main-2*, *mail1-1* and *main-3*  
840 mutants in comparison to WT Col plants. TEs are classified by superfamily. (C) Heatmap showing  
841 misregulated loci in *main-2*, *mail1-1* and *main-3* in comparison to Col and WT controls, respectively.  
842 Asterisks represents loci that are commonly misregulated in the three mutant backgrounds. (D) Venn  
843 diagrams analyses representing the overlaps between misregulated loci in *main-2*, *mail1-1* and *main-*  
844 *3*. Fisher's exact test statistically confirmed the significance of Venn diagram overlaps (p-value  
845 < 2.2.10e-16). (E) Fraction of misregulated loci in *main-2* and *mail1-1* located in chromosome arms or  
846 in pericentromeric regions as defined in [50]. Asterisks indicate statistically significant enrichments of  
847 downregulated genes and upregulated genes and TEs in chromosome arms and pericentromeric  
848 regions, respectively, in comparison to the genomic distributions of all *A. thaliana* genes and TEs (Chi-

849 Square test, \*: p-value $\leq$  0.05, \*\*: p-value $\leq$  0.01, n.s.: not significant). Percentages of genes targeted by  
850 DNA methylation and H3K9me2 were calculated based on enrichment in heterochromatin states 8  
851 and 9 as defined in [51]. RNA-seq threshold: log<sub>2</sub> $\geq$ 2, or log<sub>2</sub> $\leq$ -2 ; p-adj $<$  0.01.

852

853 **Fig 4. The *main-2* mutation has a slight effect on non-CG DNA methylation levels.**

854 (A) Genome-wide DNA methylation levels along the five *Arabidopsis* chromosomes in *main-2* versus  
855 WT Col plants. Chromosome arms are depicted in light grey, pericentromeric regions in dark grey as  
856 defined in [50]. Mb: megabase. (B-H) Boxplot analyses in two *main-2* and WT Col biological replicates  
857 showing the DNA methylation levels of all pericentromeric TEs (B) and genes (C), all chromosome arms  
858 TEs (D) and genes (E), TEs that are upregulated in *main-2* (F), and genes that are upregulated (G) and  
859 downregulated (H) in *main-2*. p-values were calculated using a Wilcoxon test. \*\*\*: p-value  $<$  2.10e-16.

860

861 **Fig 5. MAIN, MAIL1 and PP7L physically interact together.**

862 (A) Representative pictures of 3-week-old *main-2* and *mail1-1* mutants, and epitope-tagged  
863 complementing lines in comparison to WT Col plants. (B) Western blots using anti-FLAG and anti-Myc  
864 antibodies showing the accumulation of epitope-tagged PMD proteins at the expected sizes in the  
865 different complementing lines. Coomassie staining of the large Rubisco subunit (rbcl) is used as a  
866 loading control. KDa: kilodalton. (C-E) Relative expression analyses of upregulated TEs (C), upregulated  
867 genes (D) and downregulated genes (E) in the different complementing lines assayed by RT-qPCR. RT-  
868 qPCR analyses were normalized using the housekeeping *RHIP1* gene, and transcript levels in the  
869 complementing lines and mutants are represented relative to WT Col. Error bars indicate standard  
870 deviation based on three independent biological replicates. (F) FLAG-tagged MAIN and MAIL1 proteins  
871 were immunoprecipitated and putative interacting proteins were identified by mass spectrometry.  
872 Numbers of identified spectra, peptides and the normalized spectral abundance factor (NSAF<sub>e5</sub>) are



873 shown for two independent experiments, including three *main-2* and two *mail1-1* replicates. WT  
874 replicates are used as a negative control. Only proteins reproducibly enriched in all the FLAG-MAIN  
875 and FLAG-MAIL1 IP, and depleted in WT controls across multiple replicates are described in the table.  
876 (G) MAIL1-MYC was co-immunoprecipitated with MAIN-FLAG in F1 plants obtained by crossing MAIL1-  
877 MYC and MAIN-FLAG lines together. Parental MAIL1-MYC and MAIN-FLAG lines were used as negative  
878 controls. (H) The MAIN-MYC line was supertransformed with the PP7L-FLAG construct, and MAIN-MYC  
879 was co-immunoprecipitated with PP7L-FLAG. Plants expressing only MAIN-MYC or PP7L-FLAG were  
880 used as negative controls. (I) Same as H but using MAIL1-MYC plants supertransformed with the PP7L-  
881 FLAG construct. Epitope-tagged proteins were detected by Western blotting. Arrowheads indicates  
882 expected bands. Asterisks indicates non-specific hybridization. Co-exp: plants co-expressing PP7L-  
883 FLAG and MAIN-MYC (H) or PP7L-FLAG and MAIL1-MYC (I).

884

885 **Fig 6. *main-2*, *mail1-1*, *pp7l-2* single and *mail1-1 pp7l-2* double mutants display similar**  
886 **developmental and molecular phenotypes.**

887 (A) Representative pictures of 3-week-old *main-2*, *mail1-1*, *pp7l-2* single and *mail1-1 pp7l-2* double  
888 mutants in comparison to WT Col plant. (B) Heatmap showing misregulated loci in *main-2*, *mail1-1*,  
889 *pp7l-2* and *mail1-1 pp7l-2* mutants in comparison to WT Col plants using the datasets of RNA-seq Exp1,  
890 Exp2 and Exp3 (S2 and S4 Tables). One asterisk defines the loci that are commonly misregulated in all  
891 mutant backgrounds. Two asterisks define the loci that are misregulated in the *mail1-1 pp7l-2* double  
892 mutant. (C) Venn diagrams analyses representing the overlaps between misregulated loci in *main-2*,  
893 *mail1-1*, *pp7l-2* and *mail1-1 pp7l-2*. Fisher's exact test statistically confirmed the significance of Venn  
894 diagram overlaps (p-value <2.2.10e-16). (D) Relative expression analyses of upregulated TEs, genes  
895 and downregulated genes in the different genotypes assayed by RT-qPCR. RT-qPCR analyses were  
896 normalized using the housekeeping *RHIP1* gene, and transcript levels in the different mutants are  
897 represented relative to WT Col. Error bars indicate standard deviation based on three independent

898 biological replicates. (E-G) Boxplots analyses showing average RPKM values of upregulated TEs (E),  
899 upregulated genes (F) and downregulated genes (G) in *mail1-1 pp7l-2* in the indicated genotypes of  
900 RNA-seq Exp3. These analyses are based on the misregulated loci datasets defined by \*\* in panel B.  
901 P-values were calculated using a Wilcoxon test, and only significant p-values are shown. \*: p-value<  
902 1.10e-3; \*\*: p-value < 3.10-6; \*\*\*: p-value< 2.10e-16.

903

904 **Fig 7. Constitutive heterochromatin appears unaltered in *pp7l-2* mutant.**

905 Proportion of nuclei showing condensed, partially decondensed (intermediate), or decondensed  
906 chromocenters in the *pp7l-2* mutant in comparison to WT control (Col) based on H3K9me2  
907 immunostaining of nuclei. Representative pictures of nuclei displaying condensed, partially  
908 decondensed or decondensed chromocenters. DAPI: DNA stained with 4',6-diamidino-2-  
909 phenylindole.

910 **Fig 8. Evolutionary history of PMD-C and PP7 proteins in plants.**

911 (A) An alignment of the PMD-C motifs from 30 representative Eudicot species was used to construct  
912 a phylogenetic tree. The two major clades (MAIL2/MAIL2-like and MAIL3) are indicated. The species  
913 codes are given in S11 Table, and corresponding protein sequences in S12 Table). In red are genes  
914 presenting a fusion between a PMD-C and a PP7 motif. Statistical supports of key nodes calculated  
915 with the approximate likelihood-ratio test are indicated. Scale bar indicates one substitution/site. The  
916 tree was rooted using the *Amborella trichopoda* PMD-C motif (Atr1PMDC). (B) Phylogenetic tree  
917 constructed using an alignment of the PP7 motif from the same species as in (A). The two major clades  
918 (PP7 and PP7L) are indicated. In red are genes presenting a fusion between a PP7 and a PMD-C motif.  
919 Statistical supports of key nodes calculated with the approximate likelihood-ratio test are indicated.  
920 Scale bar indicates one substitution/site. The tree was rooted using the *A. thaliana* PP5 motif (AtPP5).

921

922

## 923 SUPPORTING INFORMATION CAPTIONS

924

925 **S1 Fig. MAIN is the mutated gene responsible for ATCOPIA28::GFP and TE overexpression in the *ddc***  
926 **#16 mutant.**

927 (A) Representative pictures of *ddc #18* (*ddc morc6-8*) and *ddc #344* (*ddc morc6-9*) mutants in  
928 comparison to *ATCOPIA28::GFP* WT and *ddc* control plants under UV light. Insets show plants under  
929 white light. (B) Enrichment in homozygote/heterozygote ratio of EMS over WT single nucleotide  
930 polymorphisms (SNPs), defining the linkage intervals for the populations *ddc #18* and *ddc #344*. Mb:  
931 megabase. Gray-shaded rectangles delimit the mapping intervals. (C) Location of the point mutations  
932 corresponding to the *morc6-8* and *morc6-9* alleles within the *MORC6* genomic sequence. Nucleotide  
933 and corresponding amino acid changes are indicated above the gene. Positions of the mutations are  
934 indicated relative to the transcription start site (+1). Grey boxes represent 5' and 3' UTR, blue boxes  
935 and lines represent exons and introns, respectively. (D) Enrichment in homozygote/heterozygote ratio  
936 of EMS over WT single nucleotide polymorphisms (SNPs), defining the linkage intervals for the  
937 population *ddc #16*. Gray-shaded rectangle delimits the mapping interval. (E) Location of the point  
938 mutation corresponding to the *main-3* mutant allele within the *MAIN* genomic sequence. (F) Genetic  
939 complementation analyses using the KO T-DNA insertion line *main-2*. *ddc #16* plants were crossed  
940 with *main-2* plants. F1 plants were self-crossed, and F2 plants were screened under UV light to select  
941 GFP-overexpressing plants. Western blotting using anti-GFP antibodies confirmed GFP overexpression  
942 in selected F2 plants. Coomassie staining of the large Rubisco subunit (rbL) is used as a loading  
943 control. KDa: kilodalton. Among the selected F2 plants, the presence of *main-3* EMS and *main-2* T-  
944 DNA mutant alleles were determined by dCAPS-PCR and PCR analyses, respectively. *DRM2* and *CMT3*  
945 genotyping were determined by PCR analyses. WT: Wild type, Ho: Homozygote mutant. He:  
946 Heterozygote. (G) Relative expression analyses of several TEs in the indicated genotypes assayed by  
947 RT-qPCR. RT-qPCR analyses were normalized using the housekeeping *RHIP1* gene, and transcript levels

948 in the different genotypes are represented relative to WT. Error bars indicate standard deviation  
949 based on two independent biological replicates. Screening of EMS mutant populations was done on  
950 MS plates to allow for visualization of GFP-positive individuals under UV light.

951 **S2 Fig. Combining the *drm2*, *cmt3* and *main-3* mutations exacerbate TE silencing defects.**

952 (A) Principal component analysis (PCA) performed after batch correction for first two components of  
953 the sixteen samples described in RNA-seq EMS Exp1 and Exp2. (B) Relative expression analyses of  
954 *ATCOPIA28* and *HELITRONY1D* (*AT5TE35950*) in *ddc*, *main-3* and *ddc main-3* assayed by RT-qPCR. RT-  
955 qPCR analyses were normalized using the housekeeping *RHIP1* gene, and transcript levels in the  
956 different genotypes are represented relative to WT. Error bars indicate standard deviation based on  
957 three independent biological replicates. (C) Venn diagrams analysis showing the overlaps between  
958 reproducibly upregulated TEs in *ddc*, *main-3* and *ddc main-3*. Fisher's exact test statistically confirmed  
959 the significance of Venn diagram overlaps ( $p$ -value  $< 2.2 \cdot 10^{-16}$ ). (D) Same as panel B for TEs defined  
960 as class I-IV TEs. Frames of RT-qPCR graphs are using the same color code as shown in panel C. (E)  
961 Venn diagrams analyses defining the overlaps between up- and downregulated genes in the different  
962 genotypes. Fisher's exact test statistically confirmed the significance of Venn diagram overlaps ( $p$ -  
963 value  $< 2.2 \cdot 10^{-16}$ ). (F) Fraction of misregulated genes in *ddc*, *main-3* and *ddc main-3* located in  
964 chromosome arms or in pericentromeric regions as defined in [50]. Asterisks indicate statistically  
965 significant enrichments of misregulated genes in chromosome arms or pericentromeric regions in  
966 comparison to the genomic distributions of all *A. thaliana* genes (Chi-Square test, \*\*:  $p$ -value  $\leq 0.01$ ).  
967 Percentages of genes targeted by DNA methylation and H3K9me2 were calculated based on  
968 enrichment in heterochromatin states 8 and 9 as defined in [51]. (G) Relative expression analyses of  
969 *DRM2* and *CMT3* in *ddc*, *main-3*, *ddc main-3*, *cmt3 main-3* and *dd main-3* assayed by RT-qPCR. RT-  
970 qPCR analyses were normalized using the housekeeping *RHIP1* gene, and transcript levels in the  
971 different genotypes are represented relative to WT. Error bars indicate standard deviation based on  
972 three independent biological replicates. Screening of EMS mutant populations was done on MS plates

973 to allow for visualization of GFP-positive individuals under UV light.

974 **S3 Fig. Identification of reproducibly misregulated loci in *main-2*, *mail1-1* and *main-3*.**

975 (A) Principal component analysis (PCA) performed after batch correction for first two components of  
976 the twenty-four *main-2*, *mail1-1* and WT Col samples described in RNA-seq Exp1, Exp2 and Exp3. (B-  
977 D) Relative expression analyses of several upregulated TEs (B), upregulated genes (C), and  
978 downregulated genes (D) in *main-2*, *mail1-1* and *main-3* assayed by RT-qPCR. RT-qPCR analyses were  
979 normalized using the housekeeping *RHIP1* gene, and transcript levels in the different genotypes are  
980 represented relative to respective WT controls. Error bars indicate standard deviation based on three  
981 independent biological replicates. (E) Venn diagrams analyses representing the overlaps between  
982 misregulated loci in *main-2*, *mail1-1*, *ddc* and *ddc main-3*. Fisher's exact test statistically confirmed the  
983 significance of Venn diagram overlaps (p-value <0.005).

984 **S4 Fig. DNA methylation analyses in the *main-2* mutant**

985 (A-B) Boxplot analyses in two *main-2* and WT Col biological replicates showing the DNA methylation  
986 levels at genomic sites previously defined as hypo CHG differentially methylated regions (DMR) in  
987 *cmt3* (A) and hypo CHH DMR in *drm1 drm2* (B) based on [26]. p-values were calculated using a  
988 Wilcoxon test. \*: p-value <5.10e-7, \*\*: p-value <5.10e-10, \*\*\*: p-value < 2.10e-16.

989 **S5 Fig. MAIN, MAIL1 and PP7L are required for the proper expression of similar loci, and commonly  
990 downregulated genes carry the 'DOWN' DNA motif in their promoter.**

991 (A) Principal component analysis (PCA) performed after batch correction for first two components of  
992 the thirty-two samples described in RNA-seq Exp1, Exp2 and Exp3. (B) Number of misregulated genes  
993 in the different genotypes in comparison to WT Col plants from RNA-seq Exp3 (four biological  
994 replicates, S3 and S6 Tables). (C) Number of upregulated TEs in *pp7l-2* and *mail1-1 pp7l-2*, and  
995 classified by TE superfamily. (D) Fraction of misregulated loci in *pp7l-2* and *mail1-1 pp7l-2* located in  
996 chromosome arms or in pericentromeric regions as defined in [50]. Asterisks indicate statistically

997 significant enrichments of downregulated genes, upregulated genes and TEs in chromosome arms and  
998 pericentromeric regions, respectively, in comparison to the genomic distributions of all *A. thaliana*  
999 genes and TEs (Chi-Square test, \*: p-value $\leq$  0.05, \*\*: p-value $\leq$  0.01, n.s: not significant). Percentages  
1000 of genes targeted by DNA methylation and H3K9me2 were calculated based on enrichment in  
1001 heterochromatin states 8 and 9 as defined in [51]. (E) Identification and proportions of the 'DOWN'  
1002 DNA motif among the promoters of downregulated genes and all *Arabidopsis* genes using the MEME  
1003 software. Promoter regions are defined as 1kb upstream of ATG. The list of all *Arabidopsis* genes used  
1004 to determine genomic distributions is based on the TAIR file:  
1005 TAIR10\_upstream\_1000\_translation\_start\_20101028. RNA-seq threshold: log<sub>2</sub> $\geq$ 2, or log<sub>2</sub> $\leq$ -2 ; p-adj<  
1006 0.01.

1007 **S6 Fig. Full size images of panels described in Fig 5G-I.**

1008

1009 **S1 Table. Lists of differentially expressed loci in *ddc*, *main-3* and *ddc main-3*.**

1010

1011 **S2 Table. Lists of differentially expressed loci in *main-2* and *mail1-1*.**

1012

1013 **S3 Table. Lists of loci commonly misregulated in *main-2*, *mail1-1* and *main-3*.**

1014

1015 **S4 Table. Lists of differentially expressed loci in *pp7l-2* and *mail1-1 pp7l-2*.**

1016

1017 **S5 Table. Lists of loci commonly misregulated in *main-2*, *mail1-1*, *pp7l-2* and *mail1-1 pp7l-2*.**

1018

1019 **S6 Table. Lists of loci commonly misregulated in all mutant backgrounds (except *ddc*) analyzed in  
1020 this study.**

1021

1022 **S7 Table. Lists of commonly downregulated genes displaying the “DOWN” motif in their promoter**  
1023 **and random test analyses.**

1024

1025 **S8 Table. List of species used to construct the two trees of figure 8, their codes and the**  
1026 **presence/absence of the different PMD-C and PP7 motifs.**

1027

1028 **S9 Table. (A) PMD-C and (B) PP7/PP7L motifs used to construct the two phylogenetic trees of**  
1029 **Figure 8.**

1030

1031 **S10 Table. List of primers used in this study.**

1032

1033 **S11 Table. Next Generation Sequencing (NGS) mapping and coverage statistics.**

1034

Fig1

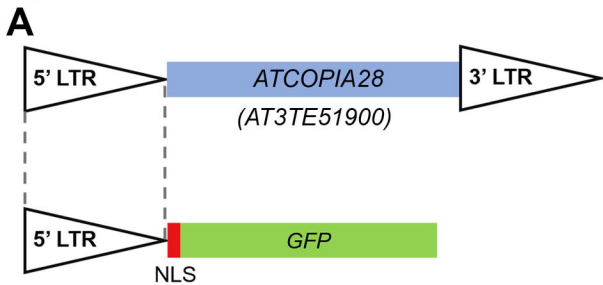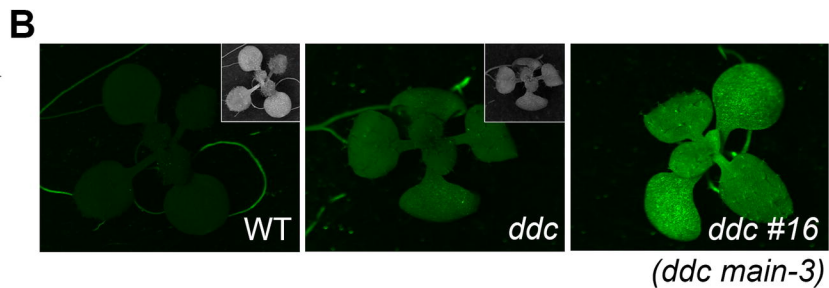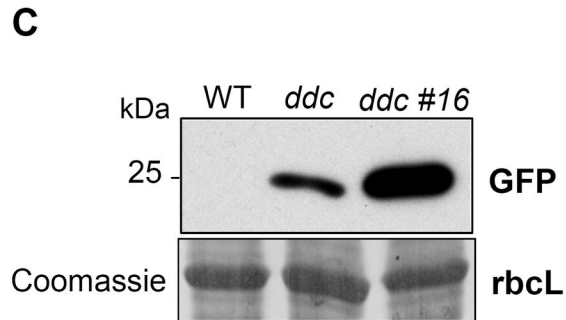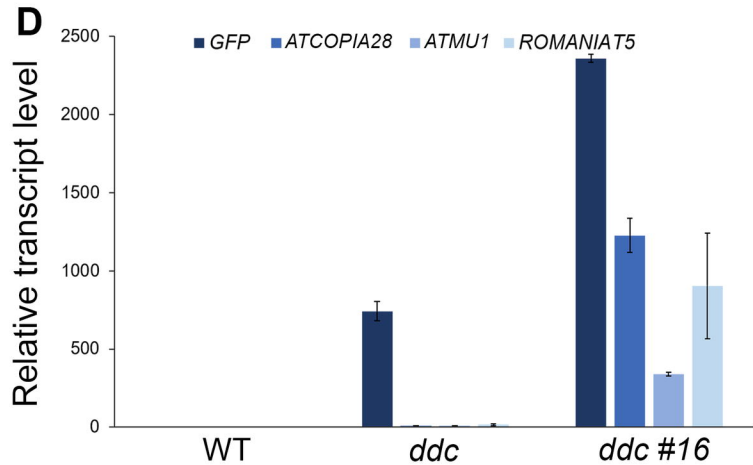



**Fig 2**

**A**

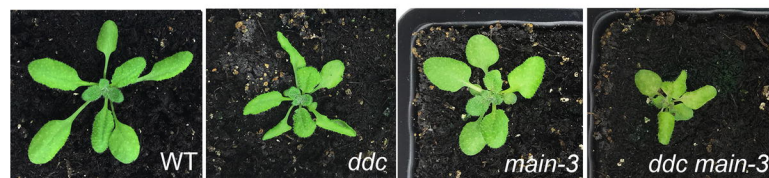

**B**

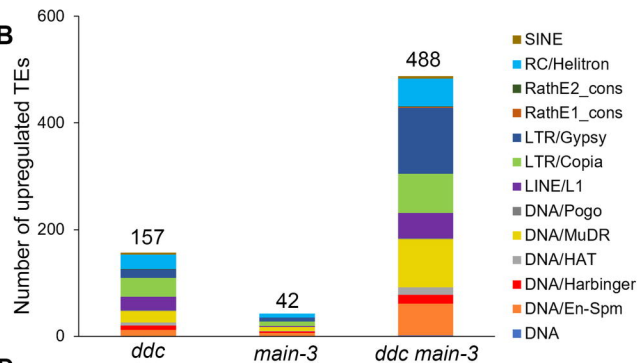

**C**

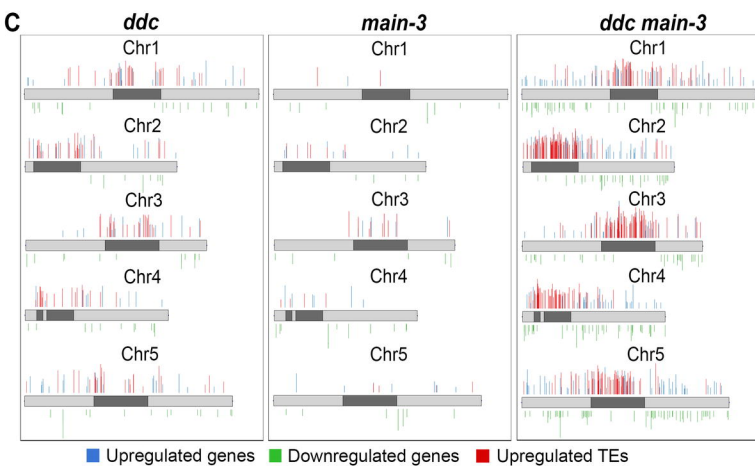

**D**

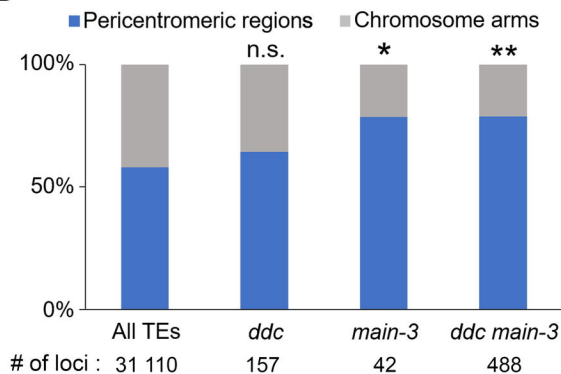

**E**

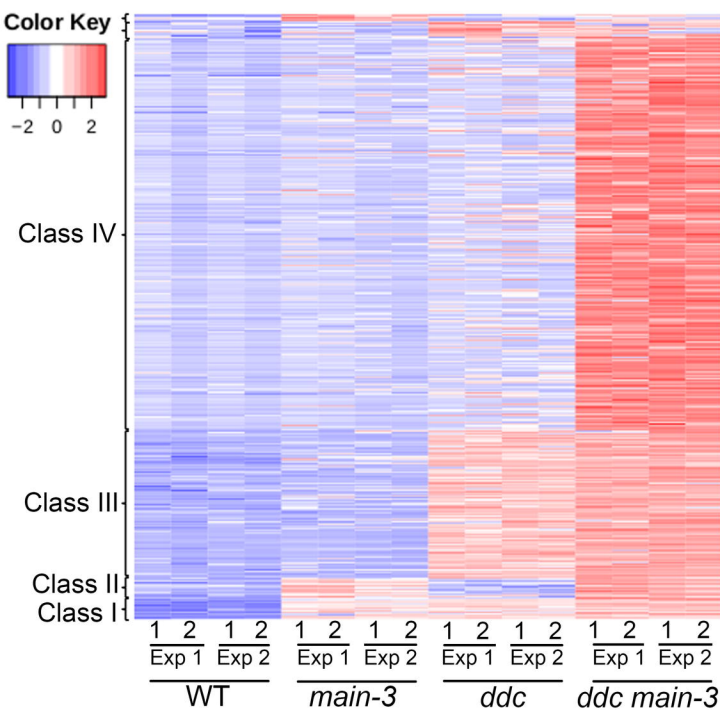

**F**

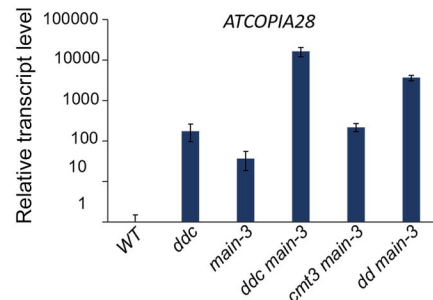

**G**

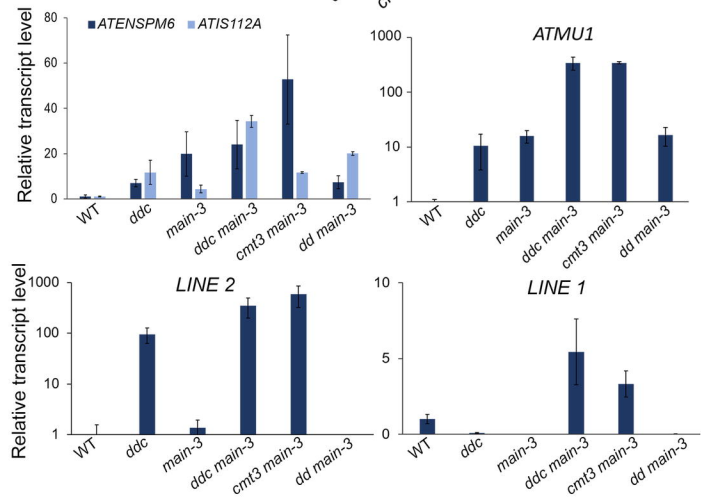

**Fig 3**

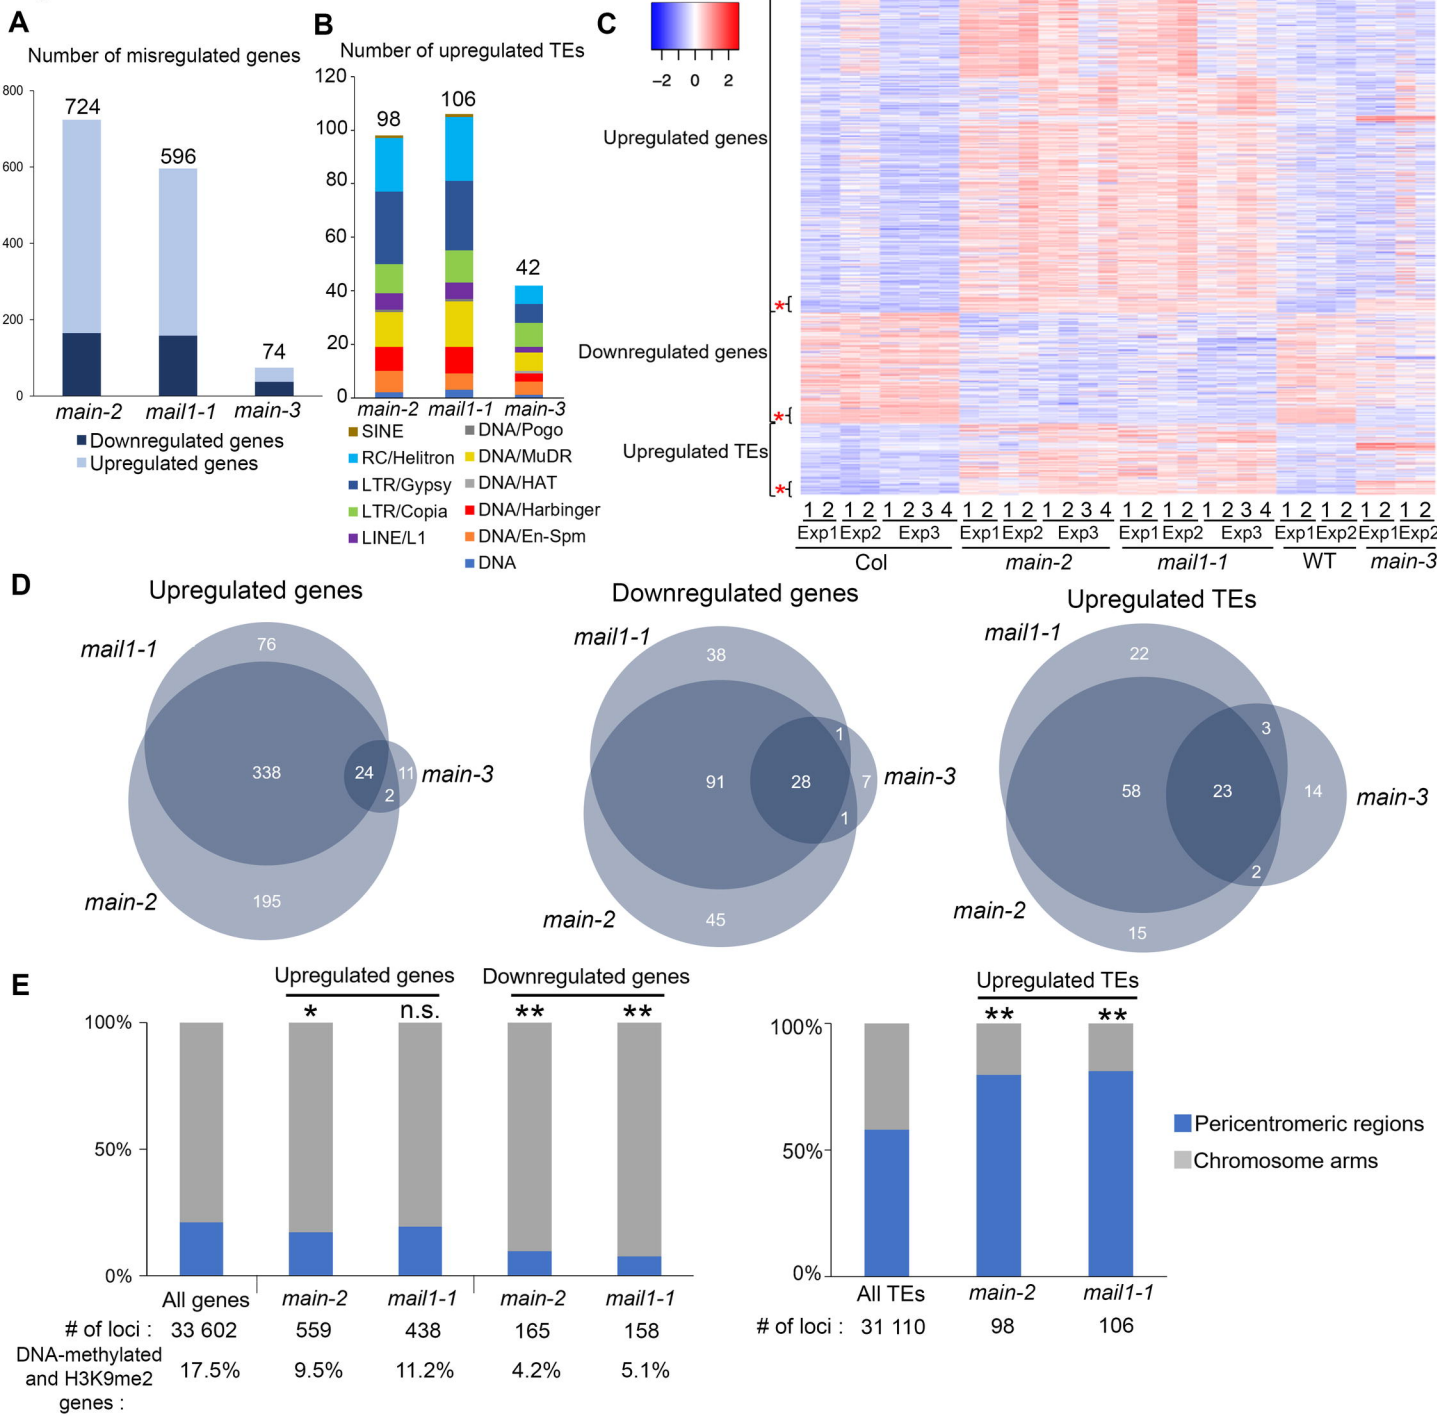

**Fig 4**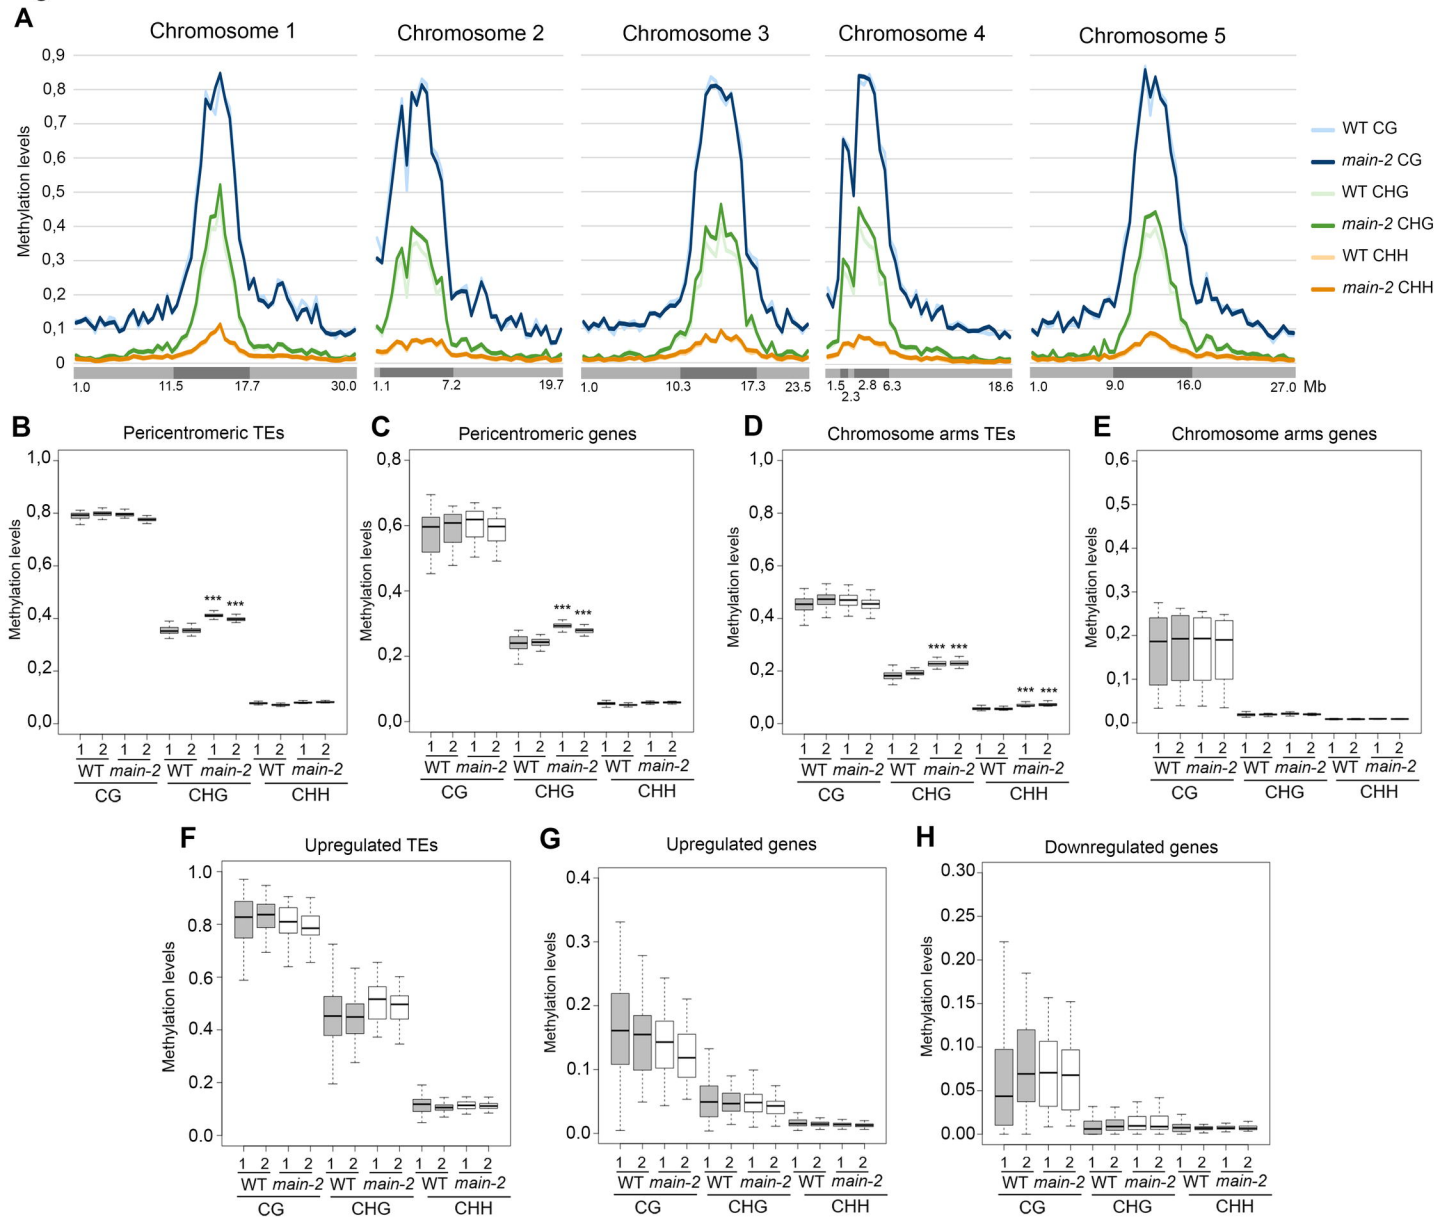

Fig 5

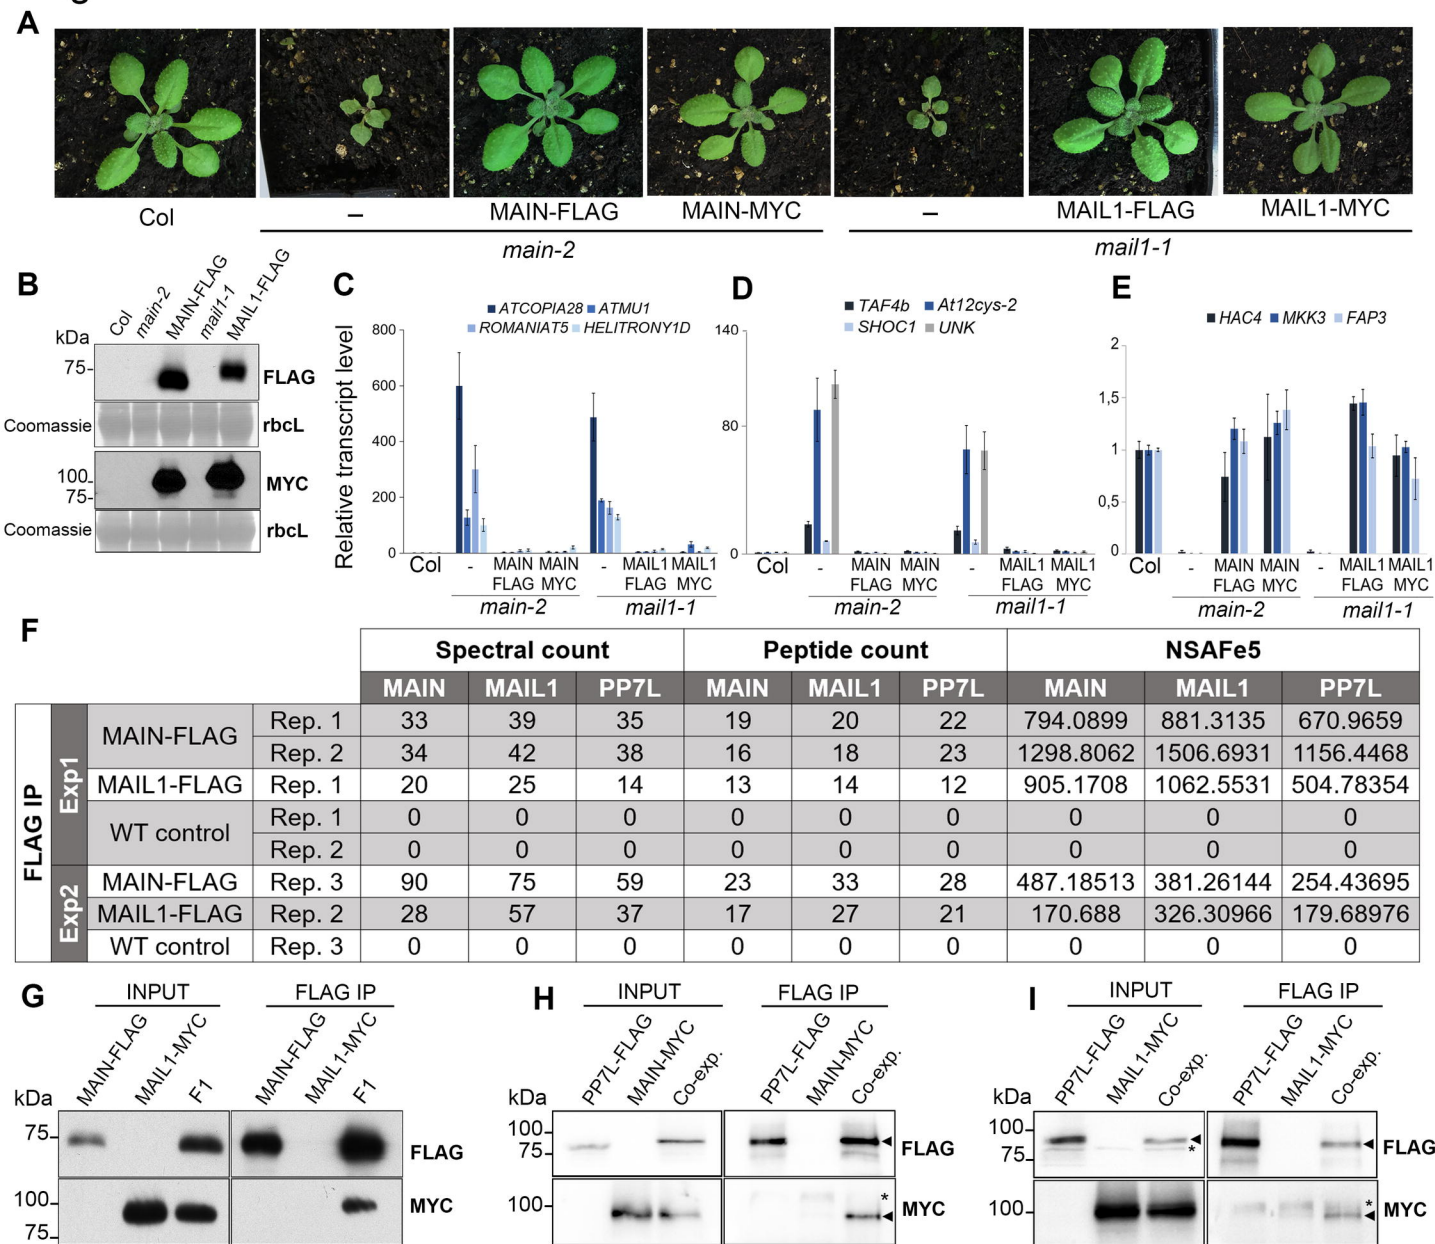



**Fig 6****A**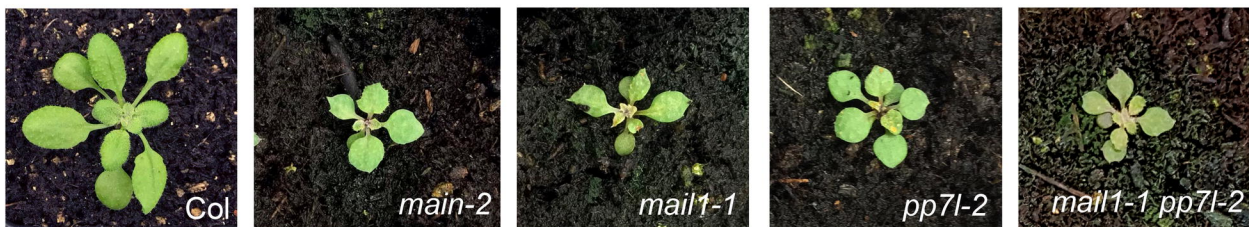**B Color Key**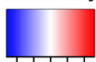

-2 0 2

Upregulated genes

\*\*

Downregulated genes

\*\*

Upregulated TEs

\*\*

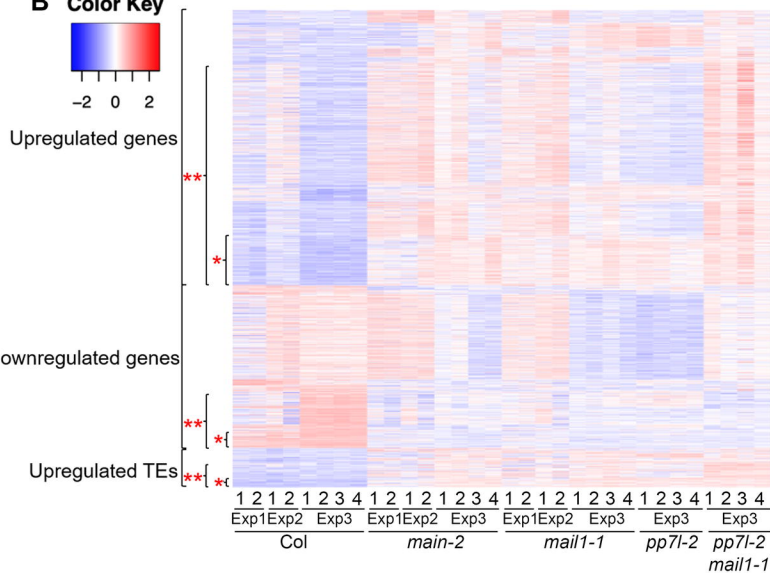**C**

Upregulated TEs

Upregulated genes

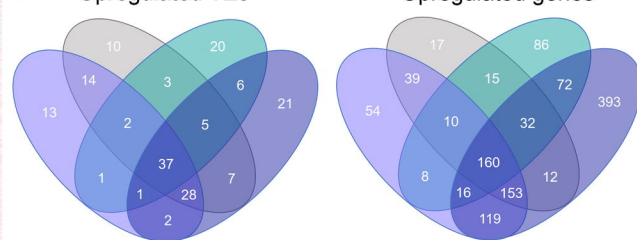

Downregulated genes

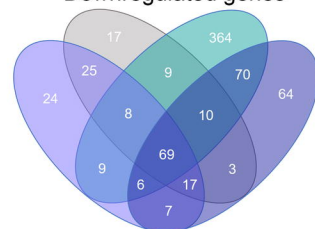

● *main-2*    ● *mail1-1*    ● *pp7l-2*    ● *mail1-1 pp7l-2*

**D**

Upregulated TEs

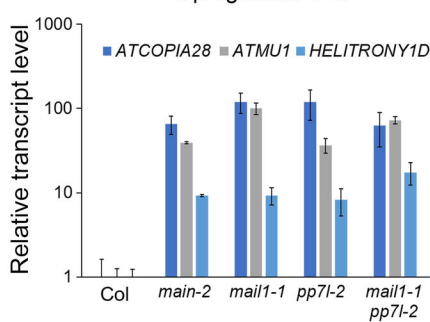

Upregulated genes

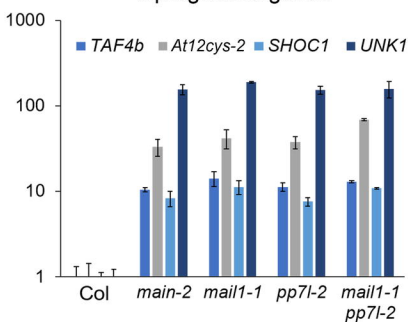

Downregulated genes

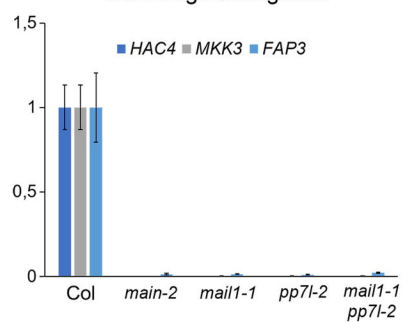**E**

Upregulated TEs

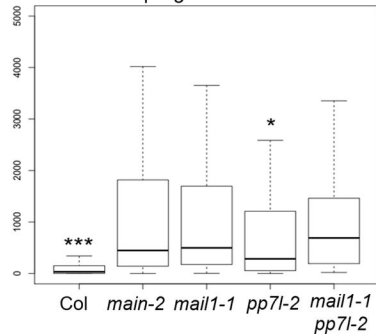**F**

Upregulated genes

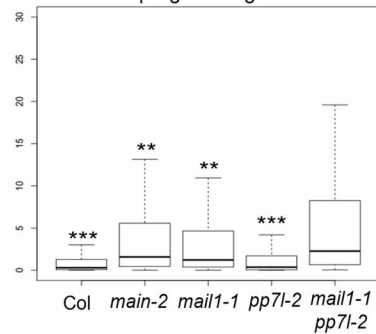**G**

Downregulated genes

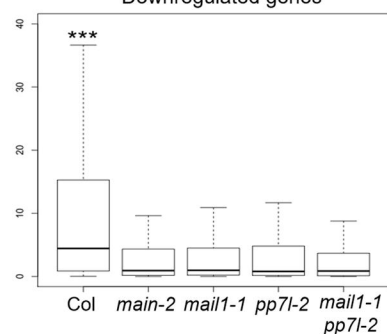

**Fig 7**

- Condensed chromocenters
- Intermediate chromocenters
- Decondensed chromocenters

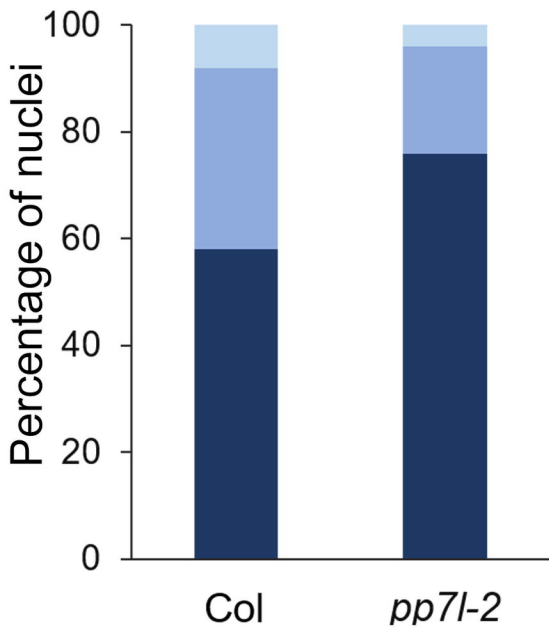

Condensed

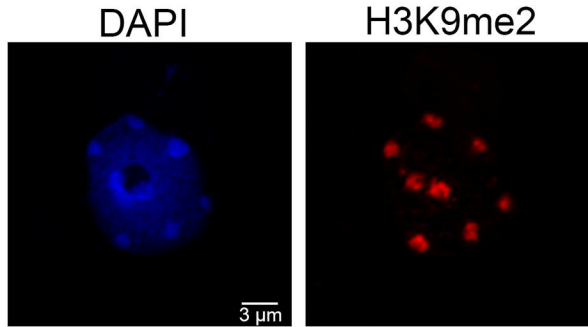

Intermediate

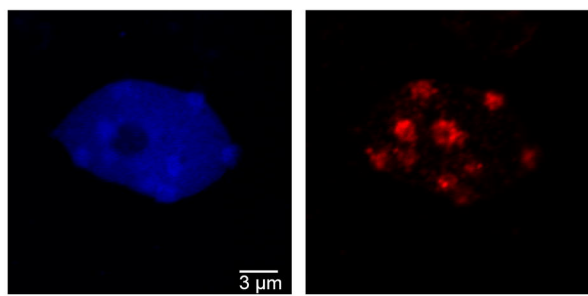

Decondensed

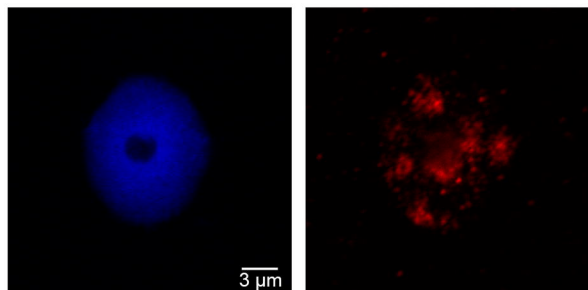

Source: https://www.biorxiv.org/content/10.1101/710905v3.full.pdf
